# Supplementary material for: Impact of two field preservation methods on genotyping success of feces
Source: PeerJ journal article supplement (doi:10.7717/peerj.20154), 2025-10-08
Supplement: SupFigs_250811.pdf [file SupFigs_250811.pdf]

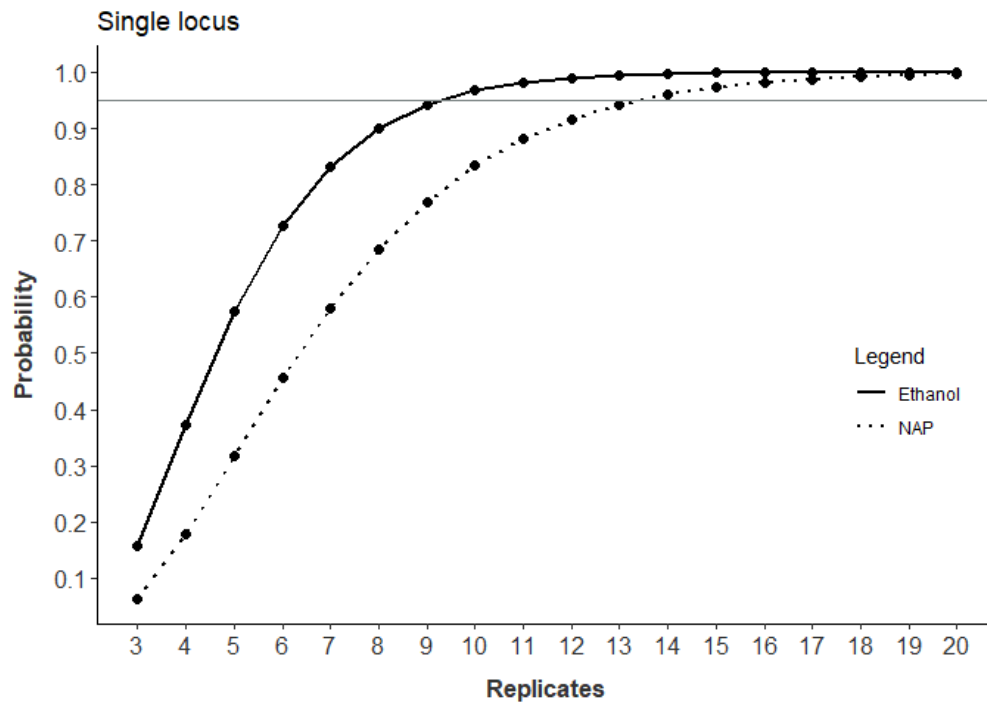

**Figure S1. Probability of obtaining the correct genotype at 3 or more replicates for a homozygous locus. using Ethanol and NAP as a preservation method.** Calculations are based on the amplification success (AS) and the genotyping success (GS) calculated for each preservation method (**Table 1**). Horizontal line marks probability of 0.95.

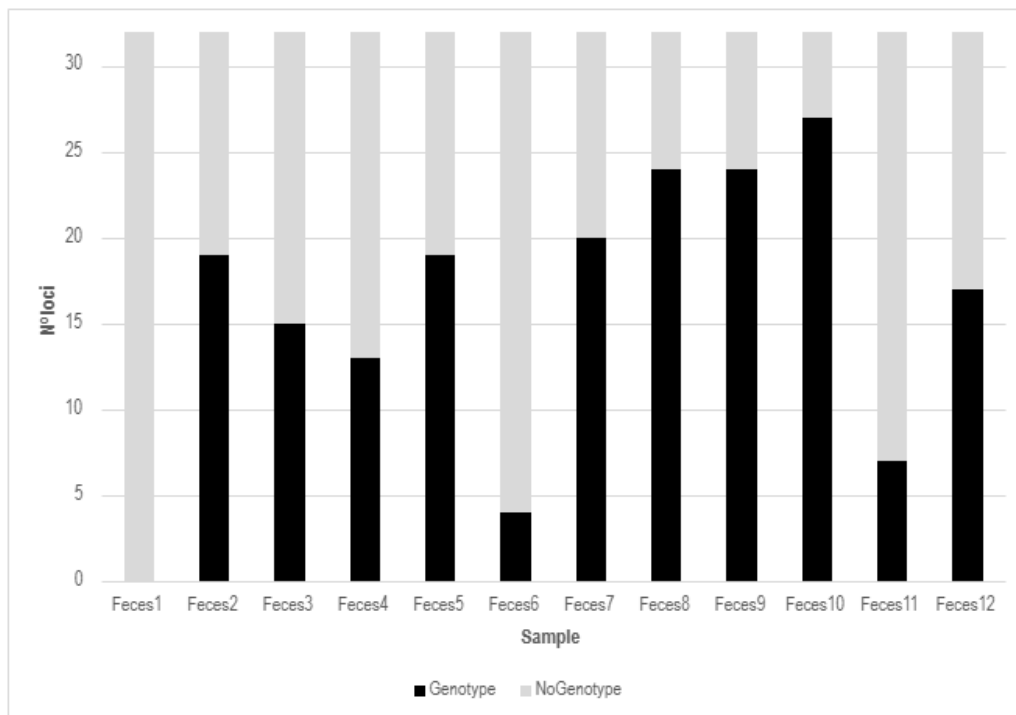

**Figure S2. Completeness of the reference genotype obtained for the microsatellite panel for each fecal sample.** Number of loci with a genotype out of the 32 microsatellite loci in the panel for each sample is indicated with the black bar (**Table S4**). Loci without a genotype, marked in grey, were those with no data or considered as 'ambiguous' (see Methods).
