# Supplementary material for: Impact of two field preservation methods on genotyping success of feces
Source: PeerJ. 2025 Oct 8;13:e20154. doi: 10.7717/peerj.20154 (PMC12514995; doi:10.7717/peerj.20154)
Supplement: Supplemental Information 2 [file peerj-13-20154-s002.xlsx]

## Sheet: Table S1.samples
Table S1. Sample metadata. Sample names used in the manuscript; field, lab and extraction identification number; geographic coordinates (WGS84); collection, shipping and DNA extraction dates.
Sample_name	Field_ID	Lab_ID	Extract_ID (NAP/Ethanol)	Longitude	Latitude	collection_date	shipping_date	DNAextraction_date
Feces1	20200628-1-AFG	JAL9095	TFE12/TFE25	-6.26659	43.494	2020-06-28	25/07/2020	21/02/2021
Feces2	20200628-2-AFG	JAL9103	TFE9/TFE22	-6.26142	43.4926	2020-06-28	25/07/2020	21/02/2021
Feces3	20200704-1-AFG	JAL9094	TFE11/TFE24	-4.87164	42.3923	2020-07-04	25/07/2020	21/02/2021
Feces4	20200704-2-AFG	JAL9093	TFE10/TFE23	-4.87161	42.3923	2020-07-04	25/07/2020	21/02/2021
Feces5	20200704-3-AFG	JAL9092	TFE1/TFE14	-4.86695	42.4691	2020-07-04	25/07/2020	21/02/2021
Feces6	20200704-4-AFG	JAL9096	TFE2/TFE15	-4.57977	42.6862	2020-07-04	25/07/2020	21/02/2021
Feces7	20200704-5-AFG	JAL9100	TFE6/TFE19	-4.59034	42.6811	2020-07-04	25/07/2020	21/02/2021
Feces8	20200705-1-AFG	JAL9102	TFE8/TFE21	-4.72083	42.6616	2020-07-05	25/07/2020	21/02/2021
Feces9	20200705-2-AFG	JAL9098	TFE4/TFE17	-4.74931	42.6568	2020-07-05	25/07/2020	21/02/2021
Feces10	20200705-3-AFG	JAL9097	TFE3/TFE16	-4.71051	42.7457	2020-07-05	25/07/2020	21/02/2021
Feces11	20200705-4-AFG	JAL9099	TFE5/TFE18	-4.69522	42.7466	2020-07-05	25/07/2020	21/02/2021
Feces12	20200706-1-AFG	JAL9101	TFE7/TFE20	-4.87169	42.5814	2020-07-06	25/07/2020	21/02/2021

## Sheet: Table S2.loci
Table S2. Loci information. Microsatellite name, type of repeat, allele size (asterisk shows size not reported in this study, but in Merllersh et al. (1997) or in the original reference; empty cells (-) show no information available), and primer sequences according to reference.
Locus name	Location	Repeat	Allele size (bp)	Forward primer (5' → 3')	Reverse primer (5'→3')	Reference
366	Autosomal	Di	124	ACATCCTCCCTCTAGCACCA	TCCCCACTGCTCATTCTCTT	Ostrander et al. 1995
377	Autosomal	Di	122 - 126	ACGTGTTGATGTACATTCCTGC	CCACCCAGTCACACAATCAG	Ostrander et al. 1995
410	Autosomal	Di	56 - 78	GAGGAAAACCAAGTGATTTTGG	ACCTGCAAGTGACCCTCTCT	Ostrander et al. 1995
442	Autosomal	Di	164*	CCAAGAACAGCCTAAGCTGG	ACACATACACGCCCAATTCA	Ostrander et al. 1995
459	Autosomal	Di	-	GGAGCTAGGTAGTGGGACAGG	TGGCATAGTCCCTCTTCCC	Ostrander et al. 1995
466	Autosomal	Di	105 - 113	TCTGGATTGTGGTCACAACC	ACTGGACACTTCTTTTCAGACG	Ostrander et al. 1995
474	Autosomal	Di	68 - 73	TTAAGCCTTATTTTGTGTTGGG	TCCAGGAAGTGTCTGCAGG	Ostrander et al. 1995
AHTH171	Autosomal	Di	82 - 88	CTCACCAGGCATAGACACTCAG	CTCATTTGTTCACGCACCC	Breen et al. 2001
c2096	Autosomal	Tetra	57 - 65	CCGTCTAAGAGCCTCCCAG	GACAAGGTTTCCTGGTTCCA	Francisco et al. 1996
c758	Autosomal	Di	228*	AAGCATCCAGAATCCCTGG	GTTGATTGGGAGATAATCCACA	Mellersh et al. 1997
CPH2	Autosomal	Di	52 - 58	TTCTGTTGTTATCGGCACCA	TTCTTGAGAACAGTGTCCTTCG	Fredholm & Winterø 1995
CPH3	Autosomal	Compound	154 - 182*	CAGGTTCAAATGATGTTTTCAG	TTGACTGAAGGAGATGTGGTAA	Fredholm & Winterø 1995
CPH4	Autosomal	Di	118 - 150*	ACTGGAGATGAAAACTGAAGATTATA	TTACAGGGGAAAGCCTCATT	Fredholm & Winterø 1995
CPH5	Autosomal	Di	74 - 88	TCCATAACAAGACCCCAAAC	GGAGGTAGGGGTCAAAAGTT	Fredholm & Winterø 1995
CPH6	Autosomal	Di	82	CATTGGCTGTTTGACTCTAGG	ACTGATGTGGGTGTCTCTGC	Fredholm & Winterø 1995
CPH7	Autosomal	Di	124 - 128	ACACAACTTTCCATAATACTTCCCA	ATCAATGCTCTCCTCCCCAG	Fredholm & Winterø 1995
CPH8	Autosomal	Di	186 - 204 *	AGGCTCACAATCCCTCTCATA	TAGATTTGATACCTCCCTGAGTCC	Fredholm & Winterø 1995
FH2010	Autosomal	Tetra	228 *	AAATGGAACAGTTGCGCATGC	CCCCTTACAGCTTCATTTTCC	Francisco et al. 1996
FH2054	Autosomal	Tetra	151*	GCCTTATTCATTGCAGTTAGGG	ATGCTGAGTTTTGAACTTTCCC	Francisco et al. 1996
FH2109	Autosomal	Tetra	176*	CAATCCAGCAACCCTCATCT	CAGGGATTGAGTCCCACATC	Francisco et al. 1996
Ren46F22	Autosomal	Di	157*	GGGGCTCTGTTATTAGGTG	TCATAAGGCAAAGAAAACC	Jouquand et al. 2000
u109	Autosomal	Di	100 - 110	AACTTTAAGCCACACTTCTGCA	ACTTGCCTCTGGCTTTTAAGC	Ostrander et al. 1993
u140	Autosomal	Di	89 - 101	CAGAGGTGGCATAGGGTGAT	TCGAAGCCCAGAGAATGACT	Ostrander et al. 1993
u172	Autosomal	Di	114	CCTGTCTCCTGTGGACCAAT	ACATGCAAAAGGACACATTACG	Ostrander et al. 1993
u173	Autosomal	Di	65 - 73	ATCCAGGTCTGGAATACCCC	TCCTTTGAATTAGCACTTGGC	Ostrander et al. 1993
u20	Autosomal	Di	-	AGCAACCCCTCCCATTTACT	TTGATCTGAATAGTCCTCTGCG	Ostrander et al. 1993
u204	Autosomal	Di	164 - 172	CGAGAGCAACATAGGCATGA	CAAAGTGCTGTGGCAGGTC	Ostrander et al. 1993
u225	Autosomal	Di	120 - 124	AGCGACTATTATATGCCAGCG	CTCATTGGTGTAAAGTGGCG	Ostrander et al. 1993
u250	Autosomal	Compound	91 - 93	TTAGTTAACCCAGCTCCCCCA	TCACCCTGTTAGCTGCTCAA	Ostrander et al. 1993
u253	Autosomal	Compound	64 - 68	AATGGCAGGATTTTCTTTTGC	ATCTTTGGACGAATGGATAAGG	Ostrander et al. 1993
u279	Autosomal	Di	83 - 89	TGCTCAATGAAATAAGCCAGG	GGCGACCTTCATTCTCTGAC	Ostrander et al. 1993
vwf	Autosomal	Hexa	105	CTCCCCTTCTCTACCTCCACCTCTAA	CAGAGGTCAGCAAGGGTACTATTGTG	Shibuya et al. 1994

## Sheet: TableS3.genotypingPCRs
Table S3. Genotyping results. Per PCR reaction replicate, locus, sample and preservation method. 'Coverage', number of reads. For 'amplified', 'genotyped' and 'correct_genotype': 0 = no, 1 = yes. 'incorrect_genotype_type': type of genotyping error (see Methods)
sample	PCR_replicate	preservation_method	locus	genotype	coverage	amplified	genotyped	correct_genotype	incorrect_genotype_type
feces1	m1	Ethanol	366	X/X	0	0	0	NA	NA
feces1	m2	Ethanol	366	X/X	0	0	0	NA	NA
feces1	m3	Ethanol	366	0/0	1	1	0	0	insufficient_coverage
feces1	m4	Ethanol	366	X/X	0	0	0	NA	NA
feces1	m5	Ethanol	366	X/X	0	0	0	NA	NA
feces1	m6	Ethanol	366	X/X	0	0	0	NA	NA
feces1	m7	Ethanol	366	X/X	0	0	0	NA	NA
feces1	m1	Ethanol	377	X/X	0	0	0	NA	NA
feces1	m2	Ethanol	377	X/X	0	0	0	NA	NA
feces1	m3	Ethanol	377	X/X	0	0	0	NA	NA
feces1	m4	Ethanol	377	X/X	0	0	0	NA	NA
feces1	m5	Ethanol	377	120/122	51	1	1	NA	ambiguous_genotype
feces1	m6	Ethanol	377	X/X	0	0	0	NA	NA
feces1	m7	Ethanol	377	X/X	0	0	0	NA	NA
feces1	m1	Ethanol	410	0/0	1	1	0	0	insufficient_coverage
feces1	m2	Ethanol	410	0/0	10	1	0	0	insufficient_coverage
feces1	m3	Ethanol	410	X/X	0	0	0	NA	NA
feces1	m4	Ethanol	410	X/X	0	0	0	NA	NA
feces1	m5	Ethanol	410	X/X	0	0	0	NA	NA
feces1	m6	Ethanol	410	X/X	0	0	0	NA	NA
feces1	m7	Ethanol	410	X/X	0	0	0	NA	NA
feces1	m1	Ethanol	442	0/0	1	1	0	0	insufficient_coverage
feces1	m2	Ethanol	442	X/X	0	0	0	NA	NA
feces1	m3	Ethanol	442	X/X	0	0	0	NA	NA
feces1	m4	Ethanol	442	X/X	0	0	0	NA	NA
feces1	m5	Ethanol	442	X/X	0	0	0	NA	NA
feces1	m6	Ethanol	442	X/X	0	0	0	NA	NA
feces1	m7	Ethanol	442	X/X	0	0	0	NA	NA
feces1	m1	Ethanol	459	X/X	0	0	0	NA	NA
feces1	m2	Ethanol	459	X/X	0	0	0	NA	NA
feces1	m3	Ethanol	459	X/X	0	0	0	NA	NA
feces1	m4	Ethanol	459	98/98	63	1	1	NA	ambiguous_genotype
feces1	m5	Ethanol	459	98/98	44	1	1	NA	ambiguous_genotype
feces1	m6	Ethanol	459	X/X	0	0	0	NA	NA
feces1	m7	Ethanol	459	X/X	0	0	0	NA	NA
feces1	m1	Ethanol	466	X/X	0	0	0	NA	NA
feces1	m2	Ethanol	466	X/X	0	0	0	NA	NA
feces1	m3	Ethanol	466	X/X	0	0	0	NA	NA
feces1	m4	Ethanol	466	X/X	0	0	0	NA	NA
feces1	m5	Ethanol	466	0/0	2	1	0	0	insufficient_coverage
feces1	m6	Ethanol	466	X/X	0	0	0	NA	NA
feces1	m7	Ethanol	466	X/X	0	0	0	NA	NA
feces1	m1	Ethanol	474	X/X	0	0	0	NA	NA
feces1	m2	Ethanol	474	X/X	0	0	0	NA	NA
feces1	m3	Ethanol	474	X/X	0	0	0	NA	NA
feces1	m4	Ethanol	474	X/X	0	0	0	NA	NA
feces1	m5	Ethanol	474	X/X	0	0	0	NA	NA
feces1	m6	Ethanol	474	X/X	0	0	0	NA	NA
feces1	m7	Ethanol	474	X/X	0	0	0	NA	NA
feces1	m1	Ethanol	AHTH171	X/X	0	0	0	NA	NA
feces1	m2	Ethanol	AHTH171	X/X	0	0	0	NA	NA
feces1	m3	Ethanol	AHTH171	0/0	13	1	0	0	insufficient_coverage
feces1	m4	Ethanol	AHTH171	0/0	5	1	0	0	insufficient_coverage
feces1	m5	Ethanol	AHTH171	0/0	2	1	0	0	insufficient_coverage
feces1	m6	Ethanol	AHTH171	X/X	0	0	0	NA	NA
feces1	m7	Ethanol	AHTH171	X/X	0	0	0	NA	NA
feces1	m1	Ethanol	c2096	0/0	7	1	0	0	insufficient_coverage
feces1	m2	Ethanol	c2096	0/0	6	1	0	0	insufficient_coverage
feces1	m3	Ethanol	c2096	X/X	0	0	0	NA	NA
feces1	m4	Ethanol	c2096	X/X	0	0	0	NA	NA
feces1	m5	Ethanol	c2096	X/X	0	0	0	NA	NA
feces1	m6	Ethanol	c2096	X/X	0	0	0	NA	NA
feces1	m7	Ethanol	c2096	X/X	0	0	0	NA	NA
feces1	m1	Ethanol	c758	0/0	1	1	0	0	insufficient_coverage
feces1	m2	Ethanol	c758	0/0	1	1	0	0	insufficient_coverage
feces1	m3	Ethanol	c758	X/X	0	0	0	NA	NA
feces1	m4	Ethanol	c758	X/X	0	0	0	NA	NA
feces1	m5	Ethanol	c758	X/X	0	0	0	NA	NA
feces1	m6	Ethanol	c758	X/X	0	0	0	NA	NA
feces1	m7	Ethanol	c758	X/X	0	0	0	NA	NA
feces1	m1	Ethanol	CPH2	56/56	28	1	1	NA	ambiguous_genotype
feces1	m2	Ethanol	CPH2	0/0	2	1	0	0	insufficient_coverage
feces1	m3	Ethanol	CPH2	X/X	0	0	0	NA	NA
feces1	m4	Ethanol	CPH2	0/0	2	1	0	0	insufficient_coverage
feces1	m5	Ethanol	CPH2	X/X	0	0	0	NA	NA
feces1	m6	Ethanol	CPH2	X/X	0	0	0	NA	NA
feces1	m7	Ethanol	CPH2	X/X	0	0	0	NA	NA
feces1	m1	Ethanol	CPH3	X/X	0	0	0	NA	NA
feces1	m2	Ethanol	CPH3	X/X	0	0	0	NA	NA
feces1	m3	Ethanol	CPH3	X/X	0	0	0	NA	NA
feces1	m4	Ethanol	CPH3	X/X	0	0	0	NA	NA
feces1	m5	Ethanol	CPH3	X/X	0	0	0	NA	NA
feces1	m6	Ethanol	CPH3	X/X	0	0	0	NA	NA
feces1	m7	Ethanol	CPH3	X/X	0	0	0	NA	NA
feces1	m1	Ethanol	CPH4	0/0	1	1	0	0	insufficient_coverage
feces1	m2	Ethanol	CPH4	X/X	0	0	0	NA	NA
feces1	m3	Ethanol	CPH4	X/X	0	0	0	NA	NA
feces1	m4	Ethanol	CPH4	X/X	0	0	0	NA	NA
feces1	m5	Ethanol	CPH4	X/X	0	0	0	NA	NA
feces1	m6	Ethanol	CPH4	X/X	0	0	0	NA	NA
feces1	m7	Ethanol	CPH4	X/X	0	0	0	NA	NA
feces1	m1	Ethanol	CPH5	0/0	1	1	0	0	insufficient_coverage
feces1	m2	Ethanol	CPH5	X/X	0	0	0	NA	NA
feces1	m3	Ethanol	CPH5	X/X	0	0	0	NA	NA
feces1	m4	Ethanol	CPH5	X/X	0	0	0	NA	NA
feces1	m5	Ethanol	CPH5	X/X	0	0	0	NA	NA
feces1	m6	Ethanol	CPH5	X/X	0	0	0	NA	NA
feces1	m7	Ethanol	CPH5	X/X	0	0	0	NA	NA
feces1	m1	Ethanol	CPH6	X/X	0	0	0	NA	NA
feces1	m2	Ethanol	CPH6	X/X	0	0	0	NA	NA
feces1	m3	Ethanol	CPH6	X/X	0	0	0	NA	NA
feces1	m4	Ethanol	CPH6	0/0	2	1	0	0	insufficient_coverage
feces1	m5	Ethanol	CPH6	X/X	0	0	0	NA	NA
feces1	m6	Ethanol	CPH6	X/X	0	0	0	NA	NA
feces1	m7	Ethanol	CPH6	0/0	1	1	0	0	insufficient_coverage
feces1	m1	Ethanol	CPH7	X/X	0	0	0	NA	NA
feces1	m2	Ethanol	CPH7	X/X	0	0	0	NA	NA
feces1	m3	Ethanol	CPH7	0/0	9	1	0	0	insufficient_coverage
feces1	m4	Ethanol	CPH7	X/X	0	0	0	NA	NA
feces1	m5	Ethanol	CPH7	0/0	1	1	0	0	insufficient_coverage
feces1	m6	Ethanol	CPH7	X/X	0	0	0	NA	NA
feces1	m7	Ethanol	CPH7	X/X	0	0	0	NA	NA
feces1	m1	Ethanol	CPH8	X/X	0	0	0	NA	NA
feces1	m2	Ethanol	CPH8	X/X	0	0	0	NA	NA
feces1	m3	Ethanol	CPH8	X/X	0	0	0	NA	NA
feces1	m4	Ethanol	CPH8	X/X	0	0	0	NA	NA
feces1	m5	Ethanol	CPH8	X/X	0	0	0	NA	NA
feces1	m6	Ethanol	CPH8	X/X	0	0	0	NA	NA
feces1	m7	Ethanol	CPH8	X/X	0	0	0	NA	NA
feces1	m1	Ethanol	FH2010	X/X	0	0	0	NA	NA
feces1	m2	Ethanol	FH2010	X/X	0	0	0	NA	NA
feces1	m3	Ethanol	FH2010	X/X	0	0	0	NA	NA
feces1	m4	Ethanol	FH2010	X/X	0	0	0	NA	NA
feces1	m5	Ethanol	FH2010	X/X	0	0	0	NA	NA
feces1	m6	Ethanol	FH2010	X/X	0	0	0	NA	NA
feces1	m7	Ethanol	FH2010	X/X	0	0	0	NA	NA
feces1	m1	Ethanol	FH2054	X/X	0	0	0	NA	NA
feces1	m2	Ethanol	FH2054	X/X	0	0	0	NA	NA
feces1	m3	Ethanol	FH2054	0/0	1	1	0	0	insufficient_coverage
feces1	m4	Ethanol	FH2054	X/X	0	0	0	NA	NA
feces1	m5	Ethanol	FH2054	X/X	0	0	0	NA	NA
feces1	m6	Ethanol	FH2054	X/X	0	0	0	NA	NA
feces1	m7	Ethanol	FH2054	X/X	0	0	0	NA	NA
feces1	m1	Ethanol	FH2109	X/X	0	0	0	NA	NA
feces1	m2	Ethanol	FH2109	X/X	0	0	0	NA	NA
feces1	m3	Ethanol	FH2109	X/X	0	0	0	NA	NA
feces1	m4	Ethanol	FH2109	X/X	0	0	0	NA	NA
feces1	m5	Ethanol	FH2109	X/X	0	0	0	NA	NA
feces1	m6	Ethanol	FH2109	X/X	0	0	0	NA	NA
feces1	m7	Ethanol	FH2109	X/X	0	0	0	NA	NA
feces1	m1	Ethanol	Ren49F22	X/X	0	0	0	NA	NA
feces1	m2	Ethanol	Ren49F22	X/X	0	0	0	NA	NA
feces1	m3	Ethanol	Ren49F22	X/X	0	0	0	NA	NA
feces1	m4	Ethanol	Ren49F22	X/X	0	0	0	NA	NA
feces1	m5	Ethanol	Ren49F22	X/X	0	0	0	NA	NA
feces1	m6	Ethanol	Ren49F22	X/X	0	0	0	NA	NA
feces1	m7	Ethanol	Ren49F22	X/X	0	0	0	NA	NA
feces1	m1	Ethanol	u109	X/X	0	0	0	NA	NA
feces1	m2	Ethanol	u109	X/X	0	0	0	NA	NA
feces1	m3	Ethanol	u109	X/X	0	0	0	NA	NA
feces1	m4	Ethanol	u109	X/X	0	0	0	NA	NA
feces1	m5	Ethanol	u109	X/X	0	0	0	NA	NA
feces1	m6	Ethanol	u109	X/X	0	0	0	NA	NA
feces1	m7	Ethanol	u109	X/X	0	0	0	NA	NA
feces1	m1	Ethanol	u140	0/0	2	1	0	0	insufficient_coverage
feces1	m2	Ethanol	u140	0/0	23	1	0	0	insufficient_coverage
feces1	m3	Ethanol	u140	X/X	0	0	0	NA	NA
feces1	m4	Ethanol	u140	X/X	0	0	0	NA	NA
feces1	m5	Ethanol	u140	X/X	0	0	0	NA	NA
feces1	m6	Ethanol	u140	X/X	0	0	0	NA	NA
feces1	m7	Ethanol	u140	0/0	6	1	0	0	insufficient_coverage
feces1	m1	Ethanol	u172	X/X	0	0	0	NA	NA
feces1	m2	Ethanol	u172	0/0	17	1	0	0	insufficient_coverage
feces1	m3	Ethanol	u172	X/X	0	0	0	NA	NA
feces1	m4	Ethanol	u172	X/X	0	0	0	NA	NA
feces1	m5	Ethanol	u172	X/X	0	0	0	NA	NA
feces1	m6	Ethanol	u172	X/X	0	0	0	NA	NA
feces1	m7	Ethanol	u172	0/0	2	1	0	0	insufficient_coverage
feces1	m1	Ethanol	u173	0/0	1	1	0	0	insufficient_coverage
feces1	m2	Ethanol	u173	X/X	0	0	0	NA	NA
feces1	m3	Ethanol	u173	0/0	1	1	0	0	insufficient_coverage
feces1	m4	Ethanol	u173	X/X	0	0	0	NA	NA
feces1	m5	Ethanol	u173	X/X	0	0	0	NA	NA
feces1	m6	Ethanol	u173	X/X	0	0	0	NA	NA
feces1	m7	Ethanol	u173	X/X	0	0	0	NA	NA
feces1	m1	Ethanol	u20	X/X	0	0	0	NA	NA
feces1	m2	Ethanol	u20	X/X	0	0	0	NA	NA
feces1	m3	Ethanol	u20	X/X	0	0	0	NA	NA
feces1	m4	Ethanol	u20	X/X	0	0	0	NA	NA
feces1	m5	Ethanol	u20	X/X	0	0	0	NA	NA
feces1	m6	Ethanol	u20	X/X	0	0	0	NA	NA
feces1	m7	Ethanol	u20	X/X	0	0	0	NA	NA
feces1	m1	Ethanol	u204	X/X	0	0	0	NA	NA
feces1	m2	Ethanol	u204	X/X	0	0	0	NA	NA
feces1	m3	Ethanol	u204	X/X	0	0	0	NA	NA
feces1	m4	Ethanol	u204	0/0	3	1	0	0	insufficient_coverage
feces1	m5	Ethanol	u204	X/X	0	0	0	NA	NA
feces1	m6	Ethanol	u204	X/X	0	0	0	NA	NA
feces1	m7	Ethanol	u204	X/X	0	0	0	NA	NA
feces1	m1	Ethanol	u225	124/124	75	1	1	NA	ambiguous_genotype
feces1	m2	Ethanol	u225	X/X	0	0	0	NA	NA
feces1	m3	Ethanol	u225	X/X	0	0	0	NA	NA
feces1	m4	Ethanol	u225	X/X	0	0	0	NA	NA
feces1	m5	Ethanol	u225	X/X	0	0	0	NA	NA
feces1	m6	Ethanol	u225	X/X	0	0	0	NA	NA
feces1	m7	Ethanol	u225	X/X	0	0	0	NA	NA
feces1	m1	Ethanol	u250	0/0	4	1	0	0	insufficient_coverage
feces1	m2	Ethanol	u250	X/X	0	0	0	NA	NA
feces1	m3	Ethanol	u250	0/0	1	1	0	0	insufficient_coverage
feces1	m4	Ethanol	u250	X/X	0	0	0	NA	NA
feces1	m5	Ethanol	u250	X/X	0	0	0	NA	NA
feces1	m6	Ethanol	u250	X/X	0	0	0	NA	NA
feces1	m7	Ethanol	u250	X/X	0	0	0	NA	NA
feces1	m1	Ethanol	u253	X/X	0	0	0	NA	NA
feces1	m2	Ethanol	u253	X/X	0	0	0	NA	NA
feces1	m3	Ethanol	u253	X/X	0	0	0	NA	NA
feces1	m4	Ethanol	u253	0/0	1	1	0	0	insufficient_coverage
feces1	m5	Ethanol	u253	0/0	5	1	0	0	insufficient_coverage
feces1	m6	Ethanol	u253	X/X	0	0	0	NA	NA
feces1	m7	Ethanol	u253	X/X	0	0	0	NA	NA
feces1	m1	Ethanol	u279	X/X	0	0	0	NA	NA
feces1	m2	Ethanol	u279	0/0	2	1	0	0	insufficient_coverage
feces1	m3	Ethanol	u279	X/X	0	0	0	NA	NA
feces1	m4	Ethanol	u279	0/0	7	1	0	0	insufficient_coverage
feces1	m5	Ethanol	u279	X/X	0	0	0	NA	NA
feces1	m6	Ethanol	u279	X/X	0	0	0	NA	NA
feces1	m7	Ethanol	u279	0/0	10	1	0	0	insufficient_coverage
feces1	m1	Ethanol	VWF	105/105	64	1	1	NA	ambiguous_genotype
feces1	m2	Ethanol	VWF	X/X	0	0	0	NA	NA
feces1	m3	Ethanol	VWF	0/0	1	1	0	0	insufficient_coverage
feces1	m4	Ethanol	VWF	X/X	0	0	0	NA	NA
feces1	m5	Ethanol	VWF	X/X	0	0	0	NA	NA
feces1	m6	Ethanol	VWF	X/X	0	0	0	NA	NA
feces1	m7	Ethanol	VWF	0/0	1	1	0	0	insufficient_coverage
feces1	m1	NAP	366	X/X	0	0	0	NA	NA
feces1	m2	NAP	366	X/X	0	0	0	NA	NA
feces1	m3	NAP	366	X/X	0	0	0	NA	NA
feces1	m4	NAP	366	X/X	0	0	0	NA	NA
feces1	m5	NAP	366	X/X	0	0	0	NA	NA
feces1	m6	NAP	366	X/X	0	0	0	NA	NA
feces1	m7	NAP	366	X/X	0	0	0	NA	NA
feces1	m1	NAP	377	X/X	0	0	0	NA	NA
feces1	m2	NAP	377	X/X	0	0	0	NA	NA
feces1	m3	NAP	377	X/X	0	0	0	NA	NA
feces1	m4	NAP	377	X/X	0	0	0	NA	NA
feces1	m5	NAP	377	X/X	0	0	0	NA	NA
feces1	m6	NAP	377	X/X	0	0	0	NA	NA
feces1	m7	NAP	377	X/X	0	0	0	NA	NA
feces1	m1	NAP	410	X/X	0	0	0	NA	NA
feces1	m2	NAP	410	0/0	2	1	0	0	insufficient_coverage
feces1	m3	NAP	410	X/X	0	0	0	NA	NA
feces1	m4	NAP	410	X/X	0	0	0	NA	NA
feces1	m5	NAP	410	X/X	0	0	0	NA	NA
feces1	m6	NAP	410	X/X	0	0	0	NA	NA
feces1	m7	NAP	410	X/X	0	0	0	NA	NA
feces1	m1	NAP	442	X/X	0	0	0	NA	NA
feces1	m2	NAP	442	X/X	0	0	0	NA	NA
feces1	m3	NAP	442	X/X	0	0	0	NA	NA
feces1	m4	NAP	442	X/X	0	0	0	NA	NA
feces1	m5	NAP	442	X/X	0	0	0	NA	NA
feces1	m6	NAP	442	X/X	0	0	0	NA	NA
feces1	m7	NAP	442	X/X	0	0	0	NA	NA
feces1	m1	NAP	459	X/X	0	0	0	NA	NA
feces1	m2	NAP	459	X/X	0	0	0	NA	NA
feces1	m3	NAP	459	X/X	0	0	0	NA	NA
feces1	m4	NAP	459	X/X	0	0	0	NA	NA
feces1	m5	NAP	459	X/X	0	0	0	NA	NA
feces1	m6	NAP	459	X/X	0	0	0	NA	NA
feces1	m7	NAP	459	X/X	0	0	0	NA	NA
feces1	m1	NAP	466	X/X	0	0	0	NA	NA
feces1	m2	NAP	466	X/X	0	0	0	NA	NA
feces1	m3	NAP	466	X/X	0	0	0	NA	NA
feces1	m4	NAP	466	X/X	0	0	0	NA	NA
feces1	m5	NAP	466	X/X	0	0	0	NA	NA
feces1	m6	NAP	466	X/X	0	0	0	NA	NA
feces1	m7	NAP	466	X/X	0	0	0	NA	NA
feces1	m1	NAP	474	X/X	0	0	0	NA	NA
feces1	m2	NAP	474	X/X	0	0	0	NA	NA
feces1	m3	NAP	474	X/X	0	0	0	NA	NA
feces1	m4	NAP	474	X/X	0	0	0	NA	NA
feces1	m5	NAP	474	X/X	0	0	0	NA	NA
feces1	m6	NAP	474	X/X	0	0	0	NA	NA
feces1	m7	NAP	474	X/X	0	0	0	NA	NA
feces1	m1	NAP	AHTH171	X/X	0	0	0	NA	NA
feces1	m2	NAP	AHTH171	X/X	0	0	0	NA	NA
feces1	m3	NAP	AHTH171	X/X	0	0	0	NA	NA
feces1	m4	NAP	AHTH171	X/X	0	0	0	NA	NA
feces1	m5	NAP	AHTH171	X/X	0	0	0	NA	NA
feces1	m6	NAP	AHTH171	X/X	0	0	0	NA	NA
feces1	m7	NAP	AHTH171	X/X	0	0	0	NA	NA
feces1	m1	NAP	c2096	X/X	0	0	0	NA	NA
feces1	m2	NAP	c2096	0/0	14	1	0	0	insufficient_coverage
feces1	m3	NAP	c2096	X/X	0	0	0	NA	NA
feces1	m4	NAP	c2096	X/X	0	0	0	NA	NA
feces1	m5	NAP	c2096	X/X	0	0	0	NA	NA
feces1	m6	NAP	c2096	X/X	0	0	0	NA	NA
feces1	m7	NAP	c2096	0/0	1	1	0	0	insufficient_coverage
feces1	m1	NAP	c758	X/X	0	0	0	NA	NA
feces1	m2	NAP	c758	X/X	0	0	0	NA	NA
feces1	m3	NAP	c758	X/X	0	0	0	NA	NA
feces1	m4	NAP	c758	X/X	0	0	0	NA	NA
feces1	m5	NAP	c758	X/X	0	0	0	NA	NA
feces1	m6	NAP	c758	X/X	0	0	0	NA	NA
feces1	m7	NAP	c758	X/X	0	0	0	NA	NA
feces1	m1	NAP	CPH2	X/X	0	0	0	NA	NA
feces1	m2	NAP	CPH2	X/X	0	0	0	NA	NA
feces1	m3	NAP	CPH2	X/X	0	0	0	NA	NA
feces1	m4	NAP	CPH2	X/X	0	0	0	NA	NA
feces1	m5	NAP	CPH2	X/X	0	0	0	NA	NA
feces1	m6	NAP	CPH2	X/X	0	0	0	NA	NA
feces1	m7	NAP	CPH2	X/X	0	0	0	NA	NA
feces1	m1	NAP	CPH3	X/X	0	0	0	NA	NA
feces1	m2	NAP	CPH3	X/X	0	0	0	NA	NA
feces1	m3	NAP	CPH3	X/X	0	0	0	NA	NA
feces1	m4	NAP	CPH3	X/X	0	0	0	NA	NA
feces1	m5	NAP	CPH3	X/X	0	0	0	NA	NA
feces1	m6	NAP	CPH3	X/X	0	0	0	NA	NA
feces1	m7	NAP	CPH3	X/X	0	0	0	NA	NA
feces1	m1	NAP	CPH4	X/X	0	0	0	NA	NA
feces1	m2	NAP	CPH4	X/X	0	0	0	NA	NA
feces1	m3	NAP	CPH4	X/X	0	0	0	NA	NA
feces1	m4	NAP	CPH4	X/X	0	0	0	NA	NA
feces1	m5	NAP	CPH4	X/X	0	0	0	NA	NA
feces1	m6	NAP	CPH4	X/X	0	0	0	NA	NA
feces1	m7	NAP	CPH4	X/X	0	0	0	NA	NA
feces1	m1	NAP	CPH5	X/X	0	0	0	NA	NA
feces1	m2	NAP	CPH5	0/0	4	1	0	0	insufficient_coverage
feces1	m3	NAP	CPH5	X/X	0	0	0	NA	NA
feces1	m4	NAP	CPH5	X/X	0	0	0	NA	NA
feces1	m5	NAP	CPH5	X/X	0	0	0	NA	NA
feces1	m6	NAP	CPH5	X/X	0	0	0	NA	NA
feces1	m7	NAP	CPH5	X/X	0	0	0	NA	NA
feces1	m1	NAP	CPH6	X/X	0	0	0	NA	NA
feces1	m2	NAP	CPH6	X/X	0	0	0	NA	NA
feces1	m3	NAP	CPH6	X/X	0	0	0	NA	NA
feces1	m4	NAP	CPH6	X/X	0	0	0	NA	NA
feces1	m5	NAP	CPH6	X/X	0	0	0	NA	NA
feces1	m6	NAP	CPH6	0/0	1	1	0	0	insufficient_coverage
feces1	m7	NAP	CPH6	X/X	0	0	0	NA	NA
feces1	m1	NAP	CPH7	X/X	0	0	0	NA	NA
feces1	m2	NAP	CPH7	X/X	0	0	0	NA	NA
feces1	m3	NAP	CPH7	X/X	0	0	0	NA	NA
feces1	m4	NAP	CPH7	X/X	0	0	0	NA	NA
feces1	m5	NAP	CPH7	X/X	0	0	0	NA	NA
feces1	m6	NAP	CPH7	X/X	0	0	0	NA	NA
feces1	m7	NAP	CPH7	X/X	0	0	0	NA	NA
feces1	m1	NAP	CPH8	X/X	0	0	0	NA	NA
feces1	m2	NAP	CPH8	X/X	0	0	0	NA	NA
feces1	m3	NAP	CPH8	X/X	0	0	0	NA	NA
feces1	m4	NAP	CPH8	X/X	0	0	0	NA	NA
feces1	m5	NAP	CPH8	X/X	0	0	0	NA	NA
feces1	m6	NAP	CPH8	X/X	0	0	0	NA	NA
feces1	m7	NAP	CPH8	X/X	0	0	0	NA	NA
feces1	m1	NAP	FH2010	X/X	0	0	0	NA	NA
feces1	m2	NAP	FH2010	X/X	0	0	0	NA	NA
feces1	m3	NAP	FH2010	X/X	0	0	0	NA	NA
feces1	m4	NAP	FH2010	X/X	0	0	0	NA	NA
feces1	m5	NAP	FH2010	X/X	0	0	0	NA	NA
feces1	m6	NAP	FH2010	X/X	0	0	0	NA	NA
feces1	m7	NAP	FH2010	X/X	0	0	0	NA	NA
feces1	m1	NAP	FH2054	X/X	0	0	0	NA	NA
feces1	m2	NAP	FH2054	X/X	0	0	0	NA	NA
feces1	m3	NAP	FH2054	X/X	0	0	0	NA	NA
feces1	m4	NAP	FH2054	X/X	0	0	0	NA	NA
feces1	m5	NAP	FH2054	X/X	0	0	0	NA	NA
feces1	m6	NAP	FH2054	X/X	0	0	0	NA	NA
feces1	m7	NAP	FH2054	X/X	0	0	0	NA	NA
feces1	m1	NAP	FH2109	X/X	0	0	0	NA	NA
feces1	m2	NAP	FH2109	X/X	0	0	0	NA	NA
feces1	m3	NAP	FH2109	X/X	0	0	0	NA	NA
feces1	m4	NAP	FH2109	X/X	0	0	0	NA	NA
feces1	m5	NAP	FH2109	X/X	0	0	0	NA	NA
feces1	m6	NAP	FH2109	X/X	0	0	0	NA	NA
feces1	m7	NAP	FH2109	X/X	0	0	0	NA	NA
feces1	m1	NAP	Ren49F22	X/X	0	0	0	NA	NA
feces1	m2	NAP	Ren49F22	X/X	0	0	0	NA	NA
feces1	m3	NAP	Ren49F22	X/X	0	0	0	NA	NA
feces1	m4	NAP	Ren49F22	X/X	0	0	0	NA	NA
feces1	m5	NAP	Ren49F22	X/X	0	0	0	NA	NA
feces1	m6	NAP	Ren49F22	X/X	0	0	0	NA	NA
feces1	m7	NAP	Ren49F22	X/X	0	0	0	NA	NA
feces1	m1	NAP	u109	X/X	0	0	0	NA	NA
feces1	m2	NAP	u109	X/X	0	0	0	NA	NA
feces1	m3	NAP	u109	X/X	0	0	0	NA	NA
feces1	m4	NAP	u109	X/X	0	0	0	NA	NA
feces1	m5	NAP	u109	X/X	0	0	0	NA	NA
feces1	m6	NAP	u109	X/X	0	0	0	NA	NA
feces1	m7	NAP	u109	X/X	0	0	0	NA	NA
feces1	m1	NAP	u140	X/X	0	0	0	NA	NA
feces1	m2	NAP	u140	X/X	0	0	0	NA	NA
feces1	m3	NAP	u140	X/X	0	0	0	NA	NA
feces1	m4	NAP	u140	X/X	0	0	0	NA	NA
feces1	m5	NAP	u140	X/X	0	0	0	NA	NA
feces1	m6	NAP	u140	0/0	4	1	0	0	insufficient_coverage
feces1	m7	NAP	u140	X/X	0	0	0	NA	NA
feces1	m1	NAP	u172	X/X	0	0	0	NA	NA
feces1	m2	NAP	u172	X/X	0	0	0	NA	NA
feces1	m3	NAP	u172	X/X	0	0	0	NA	NA
feces1	m4	NAP	u172	X/X	0	0	0	NA	NA
feces1	m5	NAP	u172	X/X	0	0	0	NA	NA
feces1	m6	NAP	u172	X/X	0	0	0	NA	NA
feces1	m7	NAP	u172	X/X	0	0	0	NA	NA
feces1	m1	NAP	u173	X/X	0	0	0	NA	NA
feces1	m2	NAP	u173	X/X	0	0	0	NA	NA
feces1	m3	NAP	u173	X/X	0	0	0	NA	NA
feces1	m4	NAP	u173	X/X	0	0	0	NA	NA
feces1	m5	NAP	u173	X/X	0	0	0	NA	NA
feces1	m6	NAP	u173	X/X	0	0	0	NA	NA
feces1	m7	NAP	u173	X/X	0	0	0	NA	NA
feces1	m1	NAP	u20	X/X	0	0	0	NA	NA
feces1	m2	NAP	u20	X/X	0	0	0	NA	NA
feces1	m3	NAP	u20	X/X	0	0	0	NA	NA
feces1	m4	NAP	u20	X/X	0	0	0	NA	NA
feces1	m5	NAP	u20	X/X	0	0	0	NA	NA
feces1	m6	NAP	u20	X/X	0	0	0	NA	NA
feces1	m7	NAP	u20	X/X	0	0	0	NA	NA
feces1	m1	NAP	u204	X/X	0	0	0	NA	NA
feces1	m2	NAP	u204	X/X	0	0	0	NA	NA
feces1	m3	NAP	u204	X/X	0	0	0	NA	NA
feces1	m4	NAP	u204	X/X	0	0	0	NA	NA
feces1	m5	NAP	u204	X/X	0	0	0	NA	NA
feces1	m6	NAP	u204	X/X	0	0	0	NA	NA
feces1	m7	NAP	u204	X/X	0	0	0	NA	NA
feces1	m1	NAP	u225	X/X	0	0	0	NA	NA
feces1	m2	NAP	u225	X/X	0	0	0	NA	NA
feces1	m3	NAP	u225	X/X	0	0	0	NA	NA
feces1	m4	NAP	u225	0/0	6	1	0	0	insufficient_coverage
feces1	m5	NAP	u225	0/0	1	1	0	0	insufficient_coverage
feces1	m6	NAP	u225	X/X	0	0	0	NA	NA
feces1	m7	NAP	u225	X/X	0	0	0	NA	NA
feces1	m1	NAP	u250	X/X	0	0	0	NA	NA
feces1	m2	NAP	u250	X/X	0	0	0	NA	NA
feces1	m3	NAP	u250	X/X	0	0	0	NA	NA
feces1	m4	NAP	u250	X/X	0	0	0	NA	NA
feces1	m5	NAP	u250	93/93	27	1	1	NA	ambiguous_genotype
feces1	m6	NAP	u250	X/X	0	0	0	NA	NA
feces1	m7	NAP	u250	0/0	1	1	0	0	insufficient_coverage
feces1	m1	NAP	u253	X/X	0	0	0	NA	NA
feces1	m2	NAP	u253	X/X	0	0	0	NA	NA
feces1	m3	NAP	u253	X/X	0	0	0	NA	NA
feces1	m4	NAP	u253	X/X	0	0	0	NA	NA
feces1	m5	NAP	u253	X/X	0	0	0	NA	NA
feces1	m6	NAP	u253	X/X	0	0	0	NA	NA
feces1	m7	NAP	u253	X/X	0	0	0	NA	NA
feces1	m1	NAP	u279	X/X	0	0	0	NA	NA
feces1	m2	NAP	u279	91/91	87	1	1	NA	ambiguous_genotype
feces1	m3	NAP	u279	X/X	0	0	0	NA	NA
feces1	m4	NAP	u279	X/X	0	0	0	NA	NA
feces1	m5	NAP	u279	X/X	0	0	0	NA	NA
feces1	m6	NAP	u279	X/X	0	0	0	NA	NA
feces1	m7	NAP	u279	0/0	1	1	0	0	insufficient_coverage
feces1	m1	NAP	VWF	X/X	0	0	0	NA	NA
feces1	m2	NAP	VWF	X/X	0	0	0	NA	NA
feces1	m3	NAP	VWF	X/X	0	0	0	NA	NA
feces1	m4	NAP	VWF	X/X	0	0	0	NA	NA
feces1	m5	NAP	VWF	X/X	0	0	0	NA	NA
feces1	m6	NAP	VWF	105/105	66	1	1	NA	ambiguous_genotype
feces1	m7	NAP	VWF	X/X	0	0	0	NA	NA
feces10	m1	Ethanol	366	120/136	415	1	1	1	NA
feces10	m2	Ethanol	366	120/136	1020	1	1	1	NA
feces10	m3	Ethanol	366	120/136	1060	1	1	1	NA
feces10	m4	Ethanol	366	X/X	0	0	0	NA	NA
feces10	m5	Ethanol	366	X/X	0	0	0	NA	NA
feces10	m6	Ethanol	366	X/X	0	0	0	NA	NA
feces10	m7	Ethanol	366	120/136	257	1	1	1	NA
feces10	m1	Ethanol	377	122/126	1053	1	1	1	NA
feces10	m2	Ethanol	377	122/126	3163	1	1	1	NA
feces10	m3	Ethanol	377	122/126	3136	1	1	1	NA
feces10	m4	Ethanol	377	X/X	0	0	0	NA	NA
feces10	m5	Ethanol	377	X/X	0	0	0	NA	NA
feces10	m6	Ethanol	377	X/X	0	0	0	NA	NA
feces10	m7	Ethanol	377	122/126	2670	1	1	1	NA
feces10	m1	Ethanol	410	56/56	563	1	1	1	NA
feces10	m2	Ethanol	410	56/56	1567	1	1	1	NA
feces10	m3	Ethanol	410	56/56	1871	1	1	1	NA
feces10	m4	Ethanol	410	X/X	0	0	0	NA	NA
feces10	m5	Ethanol	410	X/X	0	0	0	NA	NA
feces10	m6	Ethanol	410	X/X	0	0	0	NA	NA
feces10	m7	Ethanol	410	56/56	1962	1	1	1	NA
feces10	m1	Ethanol	442	119/123	67	1	1	1	NA
feces10	m2	Ethanol	442	119/123	145	1	1	1	NA
feces10	m3	Ethanol	442	119/123	135	1	1	1	NA
feces10	m4	Ethanol	442	X/X	0	0	0	NA	NA
feces10	m5	Ethanol	442	X/X	0	0	0	NA	NA
feces10	m6	Ethanol	442	X/X	0	0	0	NA	NA
feces10	m7	Ethanol	442	119/123	39	1	1	1	NA
feces10	m1	Ethanol	459	0/0	5	1	0	0	insufficient_coverage
feces10	m2	Ethanol	459	0/0	4	1	0	0	insufficient_coverage
feces10	m3	Ethanol	459	0/0	4	1	0	0	insufficient_coverage
feces10	m4	Ethanol	459	X/X	0	0	0	NA	NA
feces10	m5	Ethanol	459	X/X	0	0	0	NA	NA
feces10	m6	Ethanol	459	X/X	0	0	0	NA	NA
feces10	m7	Ethanol	459	0/0	1	1	0	0	insufficient_coverage
feces10	m1	Ethanol	466	113/113	76	1	1	1	NA
feces10	m2	Ethanol	466	113/113	335	1	1	1	NA
feces10	m3	Ethanol	466	113/113	286	1	1	1	NA
feces10	m4	Ethanol	466	X/X	0	0	0	NA	NA
feces10	m5	Ethanol	466	X/X	0	0	0	NA	NA
feces10	m6	Ethanol	466	X/X	0	0	0	NA	NA
feces10	m7	Ethanol	466	113/113	77	1	1	1	NA
feces10	m1	Ethanol	474	68/68	245	1	1	1	NA
feces10	m2	Ethanol	474	68/68	595	1	1	1	NA
feces10	m3	Ethanol	474	68/68	537	1	1	1	NA
feces10	m4	Ethanol	474	X/X	0	0	0	NA	NA
feces10	m5	Ethanol	474	X/X	0	0	0	NA	NA
feces10	m6	Ethanol	474	X/X	0	0	0	NA	NA
feces10	m7	Ethanol	474	68/68	250	1	1	1	NA
feces10	m1	Ethanol	AHTH171	82/88	1517	1	1	1	NA
feces10	m2	Ethanol	AHTH171	82/88	3018	1	1	1	NA
feces10	m3	Ethanol	AHTH171	82/88	3331	1	1	1	NA
feces10	m4	Ethanol	AHTH171	X/X	0	0	0	NA	NA
feces10	m5	Ethanol	AHTH171	X/X	0	0	0	NA	NA
feces10	m6	Ethanol	AHTH171	X/X	0	0	0	NA	NA
feces10	m7	Ethanol	AHTH171	82/88	3753	1	1	1	NA
feces10	m1	Ethanol	c2096	61/61	3785	1	1	1	NA
feces10	m2	Ethanol	c2096	61/61	7530	1	1	1	NA
feces10	m3	Ethanol	c2096	61/61	8150	1	1	1	NA
feces10	m4	Ethanol	c2096	X/X	0	0	0	NA	NA
feces10	m5	Ethanol	c2096	X/X	0	0	0	NA	NA
feces10	m6	Ethanol	c2096	X/X	0	0	0	NA	NA
feces10	m7	Ethanol	c2096	61/61	8680	1	1	1	NA
feces10	m1	Ethanol	c758	0/0	8	1	0	0	insufficient_coverage
feces10	m2	Ethanol	c758	181/187	43	1	1	1	NA
feces10	m3	Ethanol	c758	181/187	42	1	1	1	NA
feces10	m4	Ethanol	c758	X/X	0	0	0	NA	NA
feces10	m5	Ethanol	c758	X/X	0	0	0	NA	NA
feces10	m6	Ethanol	c758	X/X	0	0	0	NA	NA
feces10	m7	Ethanol	c758	0/0	3	1	0	0	insufficient_coverage
feces10	m1	Ethanol	CPH2	60/60	1659	1	1	1	NA
feces10	m2	Ethanol	CPH2	60/60	4344	1	1	1	NA
feces10	m3	Ethanol	CPH2	60/60	4696	1	1	1	NA
feces10	m4	Ethanol	CPH2	X/X	0	0	0	NA	NA
feces10	m5	Ethanol	CPH2	X/X	0	0	0	NA	NA
feces10	m6	Ethanol	CPH2	X/X	0	0	0	NA	NA
feces10	m7	Ethanol	CPH2	60/60	6063	1	1	1	NA
feces10	m1	Ethanol	CPH3	127/127	22	1	1	1	NA
feces10	m2	Ethanol	CPH3	127/127	39	1	1	1	NA
feces10	m3	Ethanol	CPH3	127/127	50	1	1	1	NA
feces10	m4	Ethanol	CPH3	X/X	0	0	0	NA	NA
feces10	m5	Ethanol	CPH3	X/X	0	0	0	NA	NA
feces10	m6	Ethanol	CPH3	X/X	0	0	0	NA	NA
feces10	m7	Ethanol	CPH3	0/0	8	1	0	0	insufficient_coverage
feces10	m1	Ethanol	CPH4	0/0	3	1	0	0	insufficient_coverage
feces10	m2	Ethanol	CPH4	0/0	2	1	0	0	insufficient_coverage
feces10	m3	Ethanol	CPH4	0/0	4	1	0	0	insufficient_coverage
feces10	m4	Ethanol	CPH4	X/X	0	0	0	NA	NA
feces10	m5	Ethanol	CPH4	X/X	0	0	0	NA	NA
feces10	m6	Ethanol	CPH4	X/X	0	0	0	NA	NA
feces10	m7	Ethanol	CPH4	X/X	0	0	0	NA	NA
feces10	m1	Ethanol	CPH5	78/78	160	1	1	1	NA
feces10	m2	Ethanol	CPH5	78/78	597	1	1	1	NA
feces10	m3	Ethanol	CPH5	78/78	540	1	1	1	NA
feces10	m4	Ethanol	CPH5	X/X	0	0	0	NA	NA
feces10	m5	Ethanol	CPH5	X/X	0	0	0	NA	NA
feces10	m6	Ethanol	CPH5	X/X	0	0	0	NA	NA
feces10	m7	Ethanol	CPH5	78/78	278	1	1	1	NA
feces10	m1	Ethanol	CPH6	86/88	1115	1	1	1	NA
feces10	m2	Ethanol	CPH6	86/88	2162	1	1	1	NA
feces10	m3	Ethanol	CPH6	86/88	2614	1	1	1	NA
feces10	m4	Ethanol	CPH6	X/X	0	0	0	NA	NA
feces10	m5	Ethanol	CPH6	X/X	0	0	0	NA	NA
feces10	m6	Ethanol	CPH6	X/X	0	0	0	NA	NA
feces10	m7	Ethanol	CPH6	86/88	2874	1	1	1	NA
feces10	m1	Ethanol	CPH7	126/128	228	1	1	1	NA
feces10	m2	Ethanol	CPH7	126/128	815	1	1	1	NA
feces10	m3	Ethanol	CPH7	126/128	699	1	1	1	NA
feces10	m4	Ethanol	CPH7	X/X	0	0	0	NA	NA
feces10	m5	Ethanol	CPH7	X/X	0	0	0	NA	NA
feces10	m6	Ethanol	CPH7	X/X	0	0	0	NA	NA
feces10	m7	Ethanol	CPH7	126/128	195	1	1	1	NA
feces10	m1	Ethanol	CPH8	162/162	91	1	1	1	NA
feces10	m2	Ethanol	CPH8	162/162	250	1	1	1	NA
feces10	m3	Ethanol	CPH8	162/162	185	1	1	1	NA
feces10	m4	Ethanol	CPH8	X/X	0	0	0	NA	NA
feces10	m5	Ethanol	CPH8	X/X	0	0	0	NA	NA
feces10	m6	Ethanol	CPH8	X/X	0	0	0	NA	NA
feces10	m7	Ethanol	CPH8	162/162	30	1	1	1	NA
feces10	m1	Ethanol	FH2010	X/X	0	0	0	NA	NA
feces10	m2	Ethanol	FH2010	0/0	1	1	0	0	insufficient_coverage
feces10	m3	Ethanol	FH2010	X/X	0	0	0	NA	NA
feces10	m4	Ethanol	FH2010	X/X	0	0	0	NA	NA
feces10	m5	Ethanol	FH2010	X/X	0	0	0	NA	NA
feces10	m6	Ethanol	FH2010	X/X	0	0	0	NA	NA
feces10	m7	Ethanol	FH2010	X/X	0	0	0	NA	NA
feces10	m1	Ethanol	FH2054	111/111	69	1	1	1	NA
feces10	m2	Ethanol	FH2054	111/111	195	1	1	1	NA
feces10	m3	Ethanol	FH2054	111/111	207	1	1	1	NA
feces10	m4	Ethanol	FH2054	X/X	0	0	0	NA	NA
feces10	m5	Ethanol	FH2054	X/X	0	0	0	NA	NA
feces10	m6	Ethanol	FH2054	X/X	0	0	0	NA	NA
feces10	m7	Ethanol	FH2054	111/111	20	1	1	1	NA
feces10	m1	Ethanol	FH2109	128/128	86	1	1	1	NA
feces10	m2	Ethanol	FH2109	128/128	106	1	1	1	NA
feces10	m3	Ethanol	FH2109	128/128	104	1	1	1	NA
feces10	m4	Ethanol	FH2109	X/X	0	0	0	NA	NA
feces10	m5	Ethanol	FH2109	X/X	0	0	0	NA	NA
feces10	m6	Ethanol	FH2109	X/X	0	0	0	NA	NA
feces10	m7	Ethanol	FH2109	0/0	5	1	0	0	insufficient_coverage
feces10	m1	Ethanol	Ren49F22	0/0	12	1	0	0	insufficient_coverage
feces10	m2	Ethanol	Ren49F22	0/0	19	1	0	0	insufficient_coverage
feces10	m3	Ethanol	Ren49F22	0/0	22	1	0	0	insufficient_coverage
feces10	m4	Ethanol	Ren49F22	X/X	0	0	0	NA	NA
feces10	m5	Ethanol	Ren49F22	X/X	0	0	0	NA	NA
feces10	m6	Ethanol	Ren49F22	X/X	0	0	0	NA	NA
feces10	m7	Ethanol	Ren49F22	0/0	2	1	0	0	insufficient_coverage
feces10	m1	Ethanol	u109	100/104	132	1	1	1	NA
feces10	m2	Ethanol	u109	100/104	352	1	1	1	NA
feces10	m3	Ethanol	u109	100/104	330	1	1	1	NA
feces10	m4	Ethanol	u109	X/X	0	0	0	NA	NA
feces10	m5	Ethanol	u109	X/X	0	0	0	NA	NA
feces10	m6	Ethanol	u109	X/X	0	0	0	NA	NA
feces10	m7	Ethanol	u109	100/104	50	1	1	1	NA
feces10	m1	Ethanol	u140	99/99	2678	1	1	1	NA
feces10	m2	Ethanol	u140	99/99	7485	1	1	1	NA
feces10	m3	Ethanol	u140	99/99	8428	1	1	1	NA
feces10	m4	Ethanol	u140	X/X	0	0	0	NA	NA
feces10	m5	Ethanol	u140	X/X	0	0	0	NA	NA
feces10	m6	Ethanol	u140	X/X	0	0	0	NA	NA
feces10	m7	Ethanol	u140	99/99	6572	1	1	1	NA
feces10	m1	Ethanol	u172	114/114	745	1	1	1	NA
feces10	m2	Ethanol	u172	114/114	2358	1	1	1	NA
feces10	m3	Ethanol	u172	114/114	2707	1	1	1	NA
feces10	m4	Ethanol	u172	X/X	0	0	0	NA	NA
feces10	m5	Ethanol	u172	X/X	0	0	0	NA	NA
feces10	m6	Ethanol	u172	X/X	0	0	0	NA	NA
feces10	m7	Ethanol	u172	114/114	1871	1	1	1	NA
feces10	m1	Ethanol	u173	63/65	933	1	1	1	NA
feces10	m2	Ethanol	u173	63/65	1968	1	1	1	NA
feces10	m3	Ethanol	u173	63/65	1910	1	1	1	NA
feces10	m4	Ethanol	u173	X/X	0	0	0	NA	NA
feces10	m5	Ethanol	u173	X/X	0	0	0	NA	NA
feces10	m6	Ethanol	u173	X/X	0	0	0	NA	NA
feces10	m7	Ethanol	u173	63/65	1092	1	1	1	NA
feces10	m1	Ethanol	u20	X/X	0	0	0	NA	NA
feces10	m2	Ethanol	u20	0/0	2	1	0	0	insufficient_coverage
feces10	m3	Ethanol	u20	X/X	0	0	0	NA	NA
feces10	m4	Ethanol	u20	X/X	0	0	0	NA	NA
feces10	m5	Ethanol	u20	X/X	0	0	0	NA	NA
feces10	m6	Ethanol	u20	X/X	0	0	0	NA	NA
feces10	m7	Ethanol	u20	0/0	1	1	0	0	insufficient_coverage
feces10	m1	Ethanol	u204	162/162	426	1	1	1	NA
feces10	m2	Ethanol	u204	162/162	1032	1	1	1	NA
feces10	m3	Ethanol	u204	162/162	906	1	1	1	NA
feces10	m4	Ethanol	u204	X/X	0	0	0	NA	NA
feces10	m5	Ethanol	u204	X/X	0	0	0	NA	NA
feces10	m6	Ethanol	u204	X/X	0	0	0	NA	NA
feces10	m7	Ethanol	u204	162/162	90	1	1	1	NA
feces10	m1	Ethanol	u225	120/120	3060	1	1	1	NA
feces10	m2	Ethanol	u225	120/120	10462	1	1	1	NA
feces10	m3	Ethanol	u225	120/120	9969	1	1	1	NA
feces10	m4	Ethanol	u225	X/X	0	0	0	NA	NA
feces10	m5	Ethanol	u225	X/X	0	0	0	NA	NA
feces10	m6	Ethanol	u225	X/X	0	0	0	NA	NA
feces10	m7	Ethanol	u225	120/120	6623	1	1	1	NA
feces10	m1	Ethanol	u250	93/93	2349	1	1	0	dropout_allele
feces10	m2	Ethanol	u250	93/93	5768	1	1	0	dropout_allele
feces10	m3	Ethanol	u250	93/93	6411	1	1	0	dropout_allele
feces10	m4	Ethanol	u250	X/X	0	0	0	NA	NA
feces10	m5	Ethanol	u250	X/X	0	0	0	NA	NA
feces10	m6	Ethanol	u250	X/X	0	0	0	NA	NA
feces10	m7	Ethanol	u250	91/93	5447	1	1	1	NA
feces10	m1	Ethanol	u253	60/62	245	1	1	1	NA
feces10	m2	Ethanol	u253	60/62	704	1	1	1	NA
feces10	m3	Ethanol	u253	60/62	775	1	1	1	NA
feces10	m4	Ethanol	u253	X/X	0	0	0	NA	NA
feces10	m5	Ethanol	u253	X/X	0	0	0	NA	NA
feces10	m6	Ethanol	u253	X/X	0	0	0	NA	NA
feces10	m7	Ethanol	u253	60/62	1121	1	1	1	NA
feces10	m1	Ethanol	u279	87/97	1709	1	1	1	NA
feces10	m2	Ethanol	u279	87/97	4645	1	1	1	NA
feces10	m3	Ethanol	u279	87/97	4642	1	1	1	NA
feces10	m4	Ethanol	u279	X/X	0	0	0	NA	NA
feces10	m5	Ethanol	u279	X/X	0	0	0	NA	NA
feces10	m6	Ethanol	u279	X/X	0	0	0	NA	NA
feces10	m7	Ethanol	u279	87/97	3061	1	1	1	NA
feces10	m1	Ethanol	VWF	87/111	8971	1	1	1	NA
feces10	m2	Ethanol	VWF	87/111	26808	1	1	1	NA
feces10	m3	Ethanol	VWF	87/111	25044	1	1	1	NA
feces10	m4	Ethanol	VWF	X/X	0	0	0	NA	NA
feces10	m5	Ethanol	VWF	X/X	0	0	0	NA	NA
feces10	m6	Ethanol	VWF	X/X	0	0	0	NA	NA
feces10	m7	Ethanol	VWF	87/111	25322	1	1	1	NA
feces10	m1	NAP	366	X/X	0	0	0	NA	NA
feces10	m2	NAP	366	0/0	1	1	0	0	insufficient_coverage
feces10	m3	NAP	366	X/X	0	0	0	NA	NA
feces10	m4	NAP	366	X/X	0	0	0	NA	NA
feces10	m5	NAP	366	X/X	0	0	0	NA	NA
feces10	m6	NAP	366	X/X	0	0	0	NA	NA
feces10	m7	NAP	366	0/0	3	1	0	0	insufficient_coverage
feces10	m1	NAP	377	122/122	160	1	1	0	dropout_allele
feces10	m2	NAP	377	122/122	32	1	1	0	dropout_allele
feces10	m3	NAP	377	X/X	0	0	0	NA	NA
feces10	m4	NAP	377	X/X	0	0	0	NA	NA
feces10	m5	NAP	377	X/X	0	0	0	NA	NA
feces10	m6	NAP	377	X/X	0	0	0	NA	NA
feces10	m7	NAP	377	0/0	30	1	0	0	insufficient_coverage
feces10	m1	NAP	410	56/56	70	1	1	1	NA
feces10	m2	NAP	410	56/56	23	1	1	1	NA
feces10	m3	NAP	410	56/56	79	1	1	1	NA
feces10	m4	NAP	410	X/X	0	0	0	NA	NA
feces10	m5	NAP	410	X/X	0	0	0	NA	NA
feces10	m6	NAP	410	X/X	0	0	0	NA	NA
feces10	m7	NAP	410	56/56	21	1	1	1	NA
feces10	m1	NAP	442	0/0	13	1	0	0	insufficient_coverage
feces10	m2	NAP	442	0/0	3	1	0	0	insufficient_coverage
feces10	m3	NAP	442	0/0	1	1	0	0	insufficient_coverage
feces10	m4	NAP	442	X/X	0	0	0	NA	NA
feces10	m5	NAP	442	X/X	0	0	0	NA	NA
feces10	m6	NAP	442	X/X	0	0	0	NA	NA
feces10	m7	NAP	442	X/X	0	0	0	NA	NA
feces10	m1	NAP	459	X/X	0	0	0	NA	NA
feces10	m2	NAP	459	X/X	0	0	0	NA	NA
feces10	m3	NAP	459	X/X	0	0	0	NA	NA
feces10	m4	NAP	459	X/X	0	0	0	NA	NA
feces10	m5	NAP	459	X/X	0	0	0	NA	NA
feces10	m6	NAP	459	X/X	0	0	0	NA	NA
feces10	m7	NAP	459	X/X	0	0	0	NA	NA
feces10	m1	NAP	466	X/X	0	0	0	NA	NA
feces10	m2	NAP	466	0/0	12	1	0	0	insufficient_coverage
feces10	m3	NAP	466	0/0	22	1	0	0	insufficient_coverage
feces10	m4	NAP	466	X/X	0	0	0	NA	NA
feces10	m5	NAP	466	X/X	0	0	0	NA	NA
feces10	m6	NAP	466	X/X	0	0	0	NA	NA
feces10	m7	NAP	466	X/X	0	0	0	NA	NA
feces10	m1	NAP	474	0/0	1	1	0	0	insufficient_coverage
feces10	m2	NAP	474	0/0	11	1	0	0	insufficient_coverage
feces10	m3	NAP	474	0/0	1	1	0	0	insufficient_coverage
feces10	m4	NAP	474	X/X	0	0	0	NA	NA
feces10	m5	NAP	474	X/X	0	0	0	NA	NA
feces10	m6	NAP	474	X/X	0	0	0	NA	NA
feces10	m7	NAP	474	0/0	1	1	0	0	insufficient_coverage
feces10	m1	NAP	AHTH171	0/0	4	1	0	0	insufficient_coverage
feces10	m2	NAP	AHTH171	0/0	3	1	0	0	insufficient_coverage
feces10	m3	NAP	AHTH171	0/0	1	1	0	0	insufficient_coverage
feces10	m4	NAP	AHTH171	X/X	0	0	0	NA	NA
feces10	m5	NAP	AHTH171	X/X	0	0	0	NA	NA
feces10	m6	NAP	AHTH171	X/X	0	0	0	NA	NA
feces10	m7	NAP	AHTH171	0/0	7	1	0	0	insufficient_coverage
feces10	m1	NAP	c2096	61/61	137	1	1	1	NA
feces10	m2	NAP	c2096	61/61	104	1	1	1	NA
feces10	m3	NAP	c2096	61/61	24	1	1	1	NA
feces10	m4	NAP	c2096	X/X	0	0	0	NA	NA
feces10	m5	NAP	c2096	X/X	0	0	0	NA	NA
feces10	m6	NAP	c2096	X/X	0	0	0	NA	NA
feces10	m7	NAP	c2096	61/61	43	1	1	1	NA
feces10	m1	NAP	c758	X/X	0	0	0	NA	NA
feces10	m2	NAP	c758	X/X	0	0	0	NA	NA
feces10	m3	NAP	c758	X/X	0	0	0	NA	NA
feces10	m4	NAP	c758	X/X	0	0	0	NA	NA
feces10	m5	NAP	c758	X/X	0	0	0	NA	NA
feces10	m6	NAP	c758	X/X	0	0	0	NA	NA
feces10	m7	NAP	c758	X/X	0	0	0	NA	NA
feces10	m1	NAP	CPH2	60/60	171	1	1	1	NA
feces10	m2	NAP	CPH2	60/60	80	1	1	1	NA
feces10	m3	NAP	CPH2	60/60	165	1	1	1	NA
feces10	m4	NAP	CPH2	X/X	0	0	0	NA	NA
feces10	m5	NAP	CPH2	X/X	0	0	0	NA	NA
feces10	m6	NAP	CPH2	X/X	0	0	0	NA	NA
feces10	m7	NAP	CPH2	0/0	26	1	0	0	insufficient_coverage
feces10	m1	NAP	CPH3	X/X	0	0	0	NA	NA
feces10	m2	NAP	CPH3	X/X	0	0	0	NA	NA
feces10	m3	NAP	CPH3	X/X	0	0	0	NA	NA
feces10	m4	NAP	CPH3	X/X	0	0	0	NA	NA
feces10	m5	NAP	CPH3	X/X	0	0	0	NA	NA
feces10	m6	NAP	CPH3	X/X	0	0	0	NA	NA
feces10	m7	NAP	CPH3	X/X	0	0	0	NA	NA
feces10	m1	NAP	CPH4	X/X	0	0	0	NA	NA
feces10	m2	NAP	CPH4	X/X	0	0	0	NA	NA
feces10	m3	NAP	CPH4	0/0	1	1	0	0	insufficient_coverage
feces10	m4	NAP	CPH4	X/X	0	0	0	NA	NA
feces10	m5	NAP	CPH4	X/X	0	0	0	NA	NA
feces10	m6	NAP	CPH4	X/X	0	0	0	NA	NA
feces10	m7	NAP	CPH4	X/X	0	0	0	NA	NA
feces10	m1	NAP	CPH5	0/0	2	1	0	0	insufficient_coverage
feces10	m2	NAP	CPH5	0/0	6	1	0	0	insufficient_coverage
feces10	m3	NAP	CPH5	76/78	32	1	1	0	false_allele
feces10	m4	NAP	CPH5	X/X	0	0	0	NA	NA
feces10	m5	NAP	CPH5	X/X	0	0	0	NA	NA
feces10	m6	NAP	CPH5	X/X	0	0	0	NA	NA
feces10	m7	NAP	CPH5	0/0	3	1	0	0	insufficient_coverage
feces10	m1	NAP	CPH6	86/88	35	1	1	1	NA
feces10	m2	NAP	CPH6	0/0	1	1	0	0	insufficient_coverage
feces10	m3	NAP	CPH6	0/0	18	1	0	0	insufficient_coverage
feces10	m4	NAP	CPH6	X/X	0	0	0	NA	NA
feces10	m5	NAP	CPH6	X/X	0	0	0	NA	NA
feces10	m6	NAP	CPH6	X/X	0	0	0	NA	NA
feces10	m7	NAP	CPH6	X/X	0	0	0	NA	NA
feces10	m1	NAP	CPH7	0/0	1	1	0	0	insufficient_coverage
feces10	m2	NAP	CPH7	0/0	12	1	0	0	insufficient_coverage
feces10	m3	NAP	CPH7	0/0	7	1	0	0	insufficient_coverage
feces10	m4	NAP	CPH7	X/X	0	0	0	NA	NA
feces10	m5	NAP	CPH7	X/X	0	0	0	NA	NA
feces10	m6	NAP	CPH7	X/X	0	0	0	NA	NA
feces10	m7	NAP	CPH7	X/X	0	0	0	NA	NA
feces10	m1	NAP	CPH8	X/X	0	0	0	NA	NA
feces10	m2	NAP	CPH8	X/X	0	0	0	NA	NA
feces10	m3	NAP	CPH8	X/X	0	0	0	NA	NA
feces10	m4	NAP	CPH8	X/X	0	0	0	NA	NA
feces10	m5	NAP	CPH8	X/X	0	0	0	NA	NA
feces10	m6	NAP	CPH8	X/X	0	0	0	NA	NA
feces10	m7	NAP	CPH8	0/0	8	1	0	0	insufficient_coverage
feces10	m1	NAP	FH2010	X/X	0	0	0	NA	NA
feces10	m2	NAP	FH2010	X/X	0	0	0	NA	NA
feces10	m3	NAP	FH2010	X/X	0	0	0	NA	NA
feces10	m4	NAP	FH2010	X/X	0	0	0	NA	NA
feces10	m5	NAP	FH2010	X/X	0	0	0	NA	NA
feces10	m6	NAP	FH2010	X/X	0	0	0	NA	NA
feces10	m7	NAP	FH2010	X/X	0	0	0	NA	NA
feces10	m1	NAP	FH2054	0/0	12	1	0	0	insufficient_coverage
feces10	m2	NAP	FH2054	X/X	0	0	0	NA	NA
feces10	m3	NAP	FH2054	0/0	6	1	0	0	insufficient_coverage
feces10	m4	NAP	FH2054	X/X	0	0	0	NA	NA
feces10	m5	NAP	FH2054	X/X	0	0	0	NA	NA
feces10	m6	NAP	FH2054	X/X	0	0	0	NA	NA
feces10	m7	NAP	FH2054	X/X	0	0	0	NA	NA
feces10	m1	NAP	FH2109	X/X	0	0	0	NA	NA
feces10	m2	NAP	FH2109	0/0	9	1	0	0	insufficient_coverage
feces10	m3	NAP	FH2109	X/X	0	0	0	NA	NA
feces10	m4	NAP	FH2109	X/X	0	0	0	NA	NA
feces10	m5	NAP	FH2109	X/X	0	0	0	NA	NA
feces10	m6	NAP	FH2109	X/X	0	0	0	NA	NA
feces10	m7	NAP	FH2109	0/0	3	1	0	0	insufficient_coverage
feces10	m1	NAP	Ren49F22	X/X	0	0	0	NA	NA
feces10	m2	NAP	Ren49F22	0/0	5	1	0	0	insufficient_coverage
feces10	m3	NAP	Ren49F22	X/X	0	0	0	NA	NA
feces10	m4	NAP	Ren49F22	X/X	0	0	0	NA	NA
feces10	m5	NAP	Ren49F22	X/X	0	0	0	NA	NA
feces10	m6	NAP	Ren49F22	X/X	0	0	0	NA	NA
feces10	m7	NAP	Ren49F22	X/X	0	0	0	NA	NA
feces10	m1	NAP	u109	100/100	44	1	1	0	dropout_allele
feces10	m2	NAP	u109	X/X	0	0	0	NA	NA
feces10	m3	NAP	u109	0/0	11	1	0	0	insufficient_coverage
feces10	m4	NAP	u109	X/X	0	0	0	NA	NA
feces10	m5	NAP	u109	X/X	0	0	0	NA	NA
feces10	m6	NAP	u109	X/X	0	0	0	NA	NA
feces10	m7	NAP	u109	0/0	1	1	0	0	insufficient_coverage
feces10	m1	NAP	u140	99/99	217	1	1	1	NA
feces10	m2	NAP	u140	99/99	106	1	1	1	NA
feces10	m3	NAP	u140	99/99	328	1	1	1	NA
feces10	m4	NAP	u140	X/X	0	0	0	NA	NA
feces10	m5	NAP	u140	X/X	0	0	0	NA	NA
feces10	m6	NAP	u140	X/X	0	0	0	NA	NA
feces10	m7	NAP	u140	99/99	59	1	1	1	NA
feces10	m1	NAP	u172	X/X	0	0	0	NA	NA
feces10	m2	NAP	u172	0/0	5	1	0	0	insufficient_coverage
feces10	m3	NAP	u172	0/0	1	1	0	0	insufficient_coverage
feces10	m4	NAP	u172	X/X	0	0	0	NA	NA
feces10	m5	NAP	u172	X/X	0	0	0	NA	NA
feces10	m6	NAP	u172	X/X	0	0	0	NA	NA
feces10	m7	NAP	u172	0/0	9	1	0	0	insufficient_coverage
feces10	m1	NAP	u173	63/65	52	1	1	1	NA
feces10	m2	NAP	u173	65/65	48	1	1	0	dropout_allele
feces10	m3	NAP	u173	63/65	54	1	1	1	NA
feces10	m4	NAP	u173	X/X	0	0	0	NA	NA
feces10	m5	NAP	u173	X/X	0	0	0	NA	NA
feces10	m6	NAP	u173	X/X	0	0	0	NA	NA
feces10	m7	NAP	u173	0/0	2	1	0	0	insufficient_coverage
feces10	m1	NAP	u20	X/X	0	0	0	NA	NA
feces10	m2	NAP	u20	X/X	0	0	0	NA	NA
feces10	m3	NAP	u20	X/X	0	0	0	NA	NA
feces10	m4	NAP	u20	X/X	0	0	0	NA	NA
feces10	m5	NAP	u20	X/X	0	0	0	NA	NA
feces10	m6	NAP	u20	X/X	0	0	0	NA	NA
feces10	m7	NAP	u20	X/X	0	0	0	NA	NA
feces10	m1	NAP	u204	162/162	56	1	1	1	NA
feces10	m2	NAP	u204	X/X	0	0	0	NA	NA
feces10	m3	NAP	u204	X/X	0	0	0	NA	NA
feces10	m4	NAP	u204	X/X	0	0	0	NA	NA
feces10	m5	NAP	u204	X/X	0	0	0	NA	NA
feces10	m6	NAP	u204	X/X	0	0	0	NA	NA
feces10	m7	NAP	u204	0/0	1	1	0	0	insufficient_coverage
feces10	m1	NAP	u225	120/120	22	1	1	1	NA
feces10	m2	NAP	u225	120/120	42	1	1	1	NA
feces10	m3	NAP	u225	120/120	407	1	1	1	NA
feces10	m4	NAP	u225	X/X	0	0	0	NA	NA
feces10	m5	NAP	u225	X/X	0	0	0	NA	NA
feces10	m6	NAP	u225	X/X	0	0	0	NA	NA
feces10	m7	NAP	u225	0/0	8	1	0	0	insufficient_coverage
feces10	m1	NAP	u250	93/93	589	1	1	0	dropout_allele
feces10	m2	NAP	u250	93/95	134	1	1	0	false_allele
feces10	m3	NAP	u250	91/93	254	1	1	1	NA
feces10	m4	NAP	u250	X/X	0	0	0	NA	NA
feces10	m5	NAP	u250	X/X	0	0	0	NA	NA
feces10	m6	NAP	u250	X/X	0	0	0	NA	NA
feces10	m7	NAP	u250	0/0	22	1	0	0	insufficient_coverage
feces10	m1	NAP	u253	60/62	22	1	1	1	NA
feces10	m2	NAP	u253	0/0	15	1	0	0	insufficient_coverage
feces10	m3	NAP	u253	0/0	3	1	0	0	insufficient_coverage
feces10	m4	NAP	u253	X/X	0	0	0	NA	NA
feces10	m5	NAP	u253	X/X	0	0	0	NA	NA
feces10	m6	NAP	u253	X/X	0	0	0	NA	NA
feces10	m7	NAP	u253	0/0	13	1	0	0	insufficient_coverage
feces10	m1	NAP	u279	0/0	5	1	0	0	insufficient_coverage
feces10	m2	NAP	u279	97/97	87	1	1	0	dropout_allele
feces10	m3	NAP	u279	87/87	78	1	1	0	dropout_allele
feces10	m4	NAP	u279	X/X	0	0	0	NA	NA
feces10	m5	NAP	u279	X/X	0	0	0	NA	NA
feces10	m6	NAP	u279	X/X	0	0	0	NA	NA
feces10	m7	NAP	u279	87/97	45	1	1	1	NA
feces10	m1	NAP	VWF	111/111	487	1	1	0	dropout_allele
feces10	m2	NAP	VWF	93/111	188	1	1	0	false_allele
feces10	m3	NAP	VWF	87/111	1166	1	1	1	NA
feces10	m4	NAP	VWF	X/X	0	0	0	NA	NA
feces10	m5	NAP	VWF	X/X	0	0	0	NA	NA
feces10	m6	NAP	VWF	X/X	0	0	0	NA	NA
feces10	m7	NAP	VWF	87/87	35	1	1	0	dropout_allele
feces11	m1	Ethanol	366	X/X	0	0	0	NA	NA
feces11	m2	Ethanol	366	0/0	4	1	0	0	insufficient_coverage
feces11	m3	Ethanol	366	0/0	5	1	0	0	insufficient_coverage
feces11	m4	Ethanol	366	0/0	3	1	0	0	insufficient_coverage
feces11	m5	Ethanol	366	0/0	2	1	0	0	insufficient_coverage
feces11	m6	Ethanol	366	0/0	10	1	0	0	insufficient_coverage
feces11	m7	Ethanol	366	124/124	128	1	1	NA	ambiguous_genotype
feces11	m1	Ethanol	377	0/0	18	1	0	0	insufficient_coverage
feces11	m2	Ethanol	377	0/0	23	1	0	0	insufficient_coverage
feces11	m3	Ethanol	377	0/0	6	1	0	0	insufficient_coverage
feces11	m4	Ethanol	377	0/0	11	1	0	0	insufficient_coverage
feces11	m5	Ethanol	377	0/0	7	1	0	0	insufficient_coverage
feces11	m6	Ethanol	377	0/0	13	1	0	0	insufficient_coverage
feces11	m7	Ethanol	377	104/104	108	1	1	NA	ambiguous_genotype
feces11	m1	Ethanol	410	56/56	47	1	1	NA	ambiguous_genotype
feces11	m2	Ethanol	410	0/0	7	1	0	0	insufficient_coverage
feces11	m3	Ethanol	410	0/0	15	1	0	0	insufficient_coverage
feces11	m4	Ethanol	410	0/0	7	1	0	0	insufficient_coverage
feces11	m5	Ethanol	410	0/0	1	1	0	0	insufficient_coverage
feces11	m6	Ethanol	410	0/0	5	1	0	0	insufficient_coverage
feces11	m7	Ethanol	410	56/72	78	1	1	NA	ambiguous_genotype
feces11	m1	Ethanol	442	X/X	0	0	0	NA	NA
feces11	m2	Ethanol	442	0/0	1	1	0	0	insufficient_coverage
feces11	m3	Ethanol	442	0/0	1	1	0	0	insufficient_coverage
feces11	m4	Ethanol	442	0/0	1	1	0	0	insufficient_coverage
feces11	m5	Ethanol	442	X/X	0	0	0	NA	NA
feces11	m6	Ethanol	442	X/X	0	0	0	NA	NA
feces11	m7	Ethanol	442	0/0	4	1	0	0	insufficient_coverage
feces11	m1	Ethanol	459	X/X	0	0	0	NA	NA
feces11	m2	Ethanol	459	X/X	0	0	0	NA	NA
feces11	m3	Ethanol	459	X/X	0	0	0	NA	NA
feces11	m4	Ethanol	459	X/X	0	0	0	NA	NA
feces11	m5	Ethanol	459	X/X	0	0	0	NA	NA
feces11	m6	Ethanol	459	X/X	0	0	0	NA	NA
feces11	m7	Ethanol	459	X/X	0	0	0	NA	NA
feces11	m1	Ethanol	466	0/0	1	1	0	0	insufficient_coverage
feces11	m2	Ethanol	466	0/0	2	1	0	0	insufficient_coverage
feces11	m3	Ethanol	466	0/0	6	1	0	0	insufficient_coverage
feces11	m4	Ethanol	466	X/X	0	0	0	NA	NA
feces11	m5	Ethanol	466	0/0	1	1	0	0	insufficient_coverage
feces11	m6	Ethanol	466	0/0	1	1	0	0	insufficient_coverage
feces11	m7	Ethanol	466	0/0	16	1	0	0	insufficient_coverage
feces11	m1	Ethanol	474	0/0	6	1	0	0	insufficient_coverage
feces11	m2	Ethanol	474	0/0	3	1	0	0	insufficient_coverage
feces11	m3	Ethanol	474	0/0	4	1	0	0	insufficient_coverage
feces11	m4	Ethanol	474	X/X	0	0	0	NA	NA
feces11	m5	Ethanol	474	X/X	0	0	0	NA	NA
feces11	m6	Ethanol	474	X/X	0	0	0	NA	NA
feces11	m7	Ethanol	474	68/68	117	1	1	NA	ambiguous_genotype
feces11	m1	Ethanol	AHTH171	88/88	121	1	1	NA	ambiguous_genotype
feces11	m2	Ethanol	AHTH171	0/0	5	1	0	0	insufficient_coverage
feces11	m3	Ethanol	AHTH171	0/0	10	1	0	0	insufficient_coverage
feces11	m4	Ethanol	AHTH171	0/0	6	1	0	0	insufficient_coverage
feces11	m5	Ethanol	AHTH171	0/0	3	1	0	0	insufficient_coverage
feces11	m6	Ethanol	AHTH171	0/0	3	1	0	0	insufficient_coverage
feces11	m7	Ethanol	AHTH171	0/0	18	1	0	0	insufficient_coverage
feces11	m1	Ethanol	c2096	61/61	28	1	1	1	NA
feces11	m2	Ethanol	c2096	61/61	29	1	1	1	NA
feces11	m3	Ethanol	c2096	61/61	22	1	1	1	NA
feces11	m4	Ethanol	c2096	0/0	14	1	0	0	insufficient_coverage
feces11	m5	Ethanol	c2096	0/0	14	1	0	0	insufficient_coverage
feces11	m6	Ethanol	c2096	0/0	10	1	0	0	insufficient_coverage
feces11	m7	Ethanol	c2096	61/61	434	1	1	1	NA
feces11	m1	Ethanol	c758	X/X	0	0	0	NA	NA
feces11	m2	Ethanol	c758	X/X	0	0	0	NA	NA
feces11	m3	Ethanol	c758	X/X	0	0	0	NA	NA
feces11	m4	Ethanol	c758	0/0	1	1	0	0	insufficient_coverage
feces11	m5	Ethanol	c758	X/X	0	0	0	NA	NA
feces11	m6	Ethanol	c758	0/0	2	1	0	0	insufficient_coverage
feces11	m7	Ethanol	c758	0/0	1	1	0	0	insufficient_coverage
feces11	m1	Ethanol	CPH2	56/56	402	1	1	NA	ambiguous_genotype
feces11	m2	Ethanol	CPH2	0/0	16	1	0	0	insufficient_coverage
feces11	m3	Ethanol	CPH2	0/0	11	1	0	0	insufficient_coverage
feces11	m4	Ethanol	CPH2	0/0	17	1	0	0	insufficient_coverage
feces11	m5	Ethanol	CPH2	0/0	6	1	0	0	insufficient_coverage
feces11	m6	Ethanol	CPH2	0/0	8	1	0	0	insufficient_coverage
feces11	m7	Ethanol	CPH2	56/56	103	1	1	NA	ambiguous_genotype
feces11	m1	Ethanol	CPH3	X/X	0	0	0	NA	NA
feces11	m2	Ethanol	CPH3	X/X	0	0	0	NA	NA
feces11	m3	Ethanol	CPH3	X/X	0	0	0	NA	NA
feces11	m4	Ethanol	CPH3	0/0	1	1	0	0	insufficient_coverage
feces11	m5	Ethanol	CPH3	X/X	0	0	0	NA	NA
feces11	m6	Ethanol	CPH3	X/X	0	0	0	NA	NA
feces11	m7	Ethanol	CPH3	0/0	5	1	0	0	insufficient_coverage
feces11	m1	Ethanol	CPH4	X/X	0	0	0	NA	NA
feces11	m2	Ethanol	CPH4	X/X	0	0	0	NA	NA
feces11	m3	Ethanol	CPH4	X/X	0	0	0	NA	NA
feces11	m4	Ethanol	CPH4	X/X	0	0	0	NA	NA
feces11	m5	Ethanol	CPH4	X/X	0	0	0	NA	NA
feces11	m6	Ethanol	CPH4	X/X	0	0	0	NA	NA
feces11	m7	Ethanol	CPH4	X/X	0	0	0	NA	NA
feces11	m1	Ethanol	CPH5	0/0	2	1	0	0	insufficient_coverage
feces11	m2	Ethanol	CPH5	0/0	2	1	0	0	insufficient_coverage
feces11	m3	Ethanol	CPH5	0/0	1	1	0	0	insufficient_coverage
feces11	m4	Ethanol	CPH5	0/0	5	1	0	0	insufficient_coverage
feces11	m5	Ethanol	CPH5	0/0	1	1	0	0	insufficient_coverage
feces11	m6	Ethanol	CPH5	0/0	1	1	0	0	insufficient_coverage
feces11	m7	Ethanol	CPH5	0/0	6	1	0	0	insufficient_coverage
feces11	m1	Ethanol	CPH6	86/88	67	1	1	NA	ambiguous_genotype
feces11	m2	Ethanol	CPH6	0/0	1	1	0	0	insufficient_coverage
feces11	m3	Ethanol	CPH6	0/0	2	1	0	0	insufficient_coverage
feces11	m4	Ethanol	CPH6	0/0	10	1	0	0	insufficient_coverage
feces11	m5	Ethanol	CPH6	0/0	1	1	0	0	insufficient_coverage
feces11	m6	Ethanol	CPH6	0/0	3	1	0	0	insufficient_coverage
feces11	m7	Ethanol	CPH6	88/88	64	1	1	NA	ambiguous_genotype
feces11	m1	Ethanol	CPH7	0/0	1	1	0	0	insufficient_coverage
feces11	m2	Ethanol	CPH7	0/0	11	1	0	0	insufficient_coverage
feces11	m3	Ethanol	CPH7	0/0	3	1	0	0	insufficient_coverage
feces11	m4	Ethanol	CPH7	0/0	7	1	0	0	insufficient_coverage
feces11	m5	Ethanol	CPH7	X/X	0	0	0	NA	NA
feces11	m6	Ethanol	CPH7	0/0	1	1	0	0	insufficient_coverage
feces11	m7	Ethanol	CPH7	120/120	21	1	1	NA	ambiguous_genotype
feces11	m1	Ethanol	CPH8	X/X	0	0	0	NA	NA
feces11	m2	Ethanol	CPH8	0/0	6	1	0	0	insufficient_coverage
feces11	m3	Ethanol	CPH8	X/X	0	0	0	NA	NA
feces11	m4	Ethanol	CPH8	0/0	1	1	0	0	insufficient_coverage
feces11	m5	Ethanol	CPH8	X/X	0	0	0	NA	NA
feces11	m6	Ethanol	CPH8	X/X	0	0	0	NA	NA
feces11	m7	Ethanol	CPH8	164/164	41	1	1	NA	ambiguous_genotype
feces11	m1	Ethanol	FH2010	X/X	0	0	0	NA	NA
feces11	m2	Ethanol	FH2010	X/X	0	0	0	NA	NA
feces11	m3	Ethanol	FH2010	X/X	0	0	0	NA	NA
feces11	m4	Ethanol	FH2010	X/X	0	0	0	NA	NA
feces11	m5	Ethanol	FH2010	X/X	0	0	0	NA	NA
feces11	m6	Ethanol	FH2010	X/X	0	0	0	NA	NA
feces11	m7	Ethanol	FH2010	X/X	0	0	0	NA	NA
feces11	m1	Ethanol	FH2054	X/X	0	0	0	NA	NA
feces11	m2	Ethanol	FH2054	X/X	0	0	0	NA	NA
feces11	m3	Ethanol	FH2054	0/0	4	1	0	0	insufficient_coverage
feces11	m4	Ethanol	FH2054	X/X	0	0	0	NA	NA
feces11	m5	Ethanol	FH2054	X/X	0	0	0	NA	NA
feces11	m6	Ethanol	FH2054	0/0	1	1	0	0	insufficient_coverage
feces11	m7	Ethanol	FH2054	0/0	6	1	0	0	insufficient_coverage
feces11	m1	Ethanol	FH2109	X/X	0	0	0	NA	NA
feces11	m2	Ethanol	FH2109	0/0	1	1	0	0	insufficient_coverage
feces11	m3	Ethanol	FH2109	X/X	0	0	0	NA	NA
feces11	m4	Ethanol	FH2109	0/0	1	1	0	0	insufficient_coverage
feces11	m5	Ethanol	FH2109	X/X	0	0	0	NA	NA
feces11	m6	Ethanol	FH2109	0/0	1	1	0	0	insufficient_coverage
feces11	m7	Ethanol	FH2109	0/0	14	1	0	0	insufficient_coverage
feces11	m1	Ethanol	Ren49F22	X/X	0	0	0	NA	NA
feces11	m2	Ethanol	Ren49F22	X/X	0	0	0	NA	NA
feces11	m3	Ethanol	Ren49F22	X/X	0	0	0	NA	NA
feces11	m4	Ethanol	Ren49F22	X/X	0	0	0	NA	NA
feces11	m5	Ethanol	Ren49F22	X/X	0	0	0	NA	NA
feces11	m6	Ethanol	Ren49F22	X/X	0	0	0	NA	NA
feces11	m7	Ethanol	Ren49F22	X/X	0	0	0	NA	NA
feces11	m1	Ethanol	u109	X/X	0	0	0	NA	NA
feces11	m2	Ethanol	u109	0/0	2	1	0	0	insufficient_coverage
feces11	m3	Ethanol	u109	0/0	1	1	0	0	insufficient_coverage
feces11	m4	Ethanol	u109	0/0	1	1	0	0	insufficient_coverage
feces11	m5	Ethanol	u109	0/0	1	1	0	0	insufficient_coverage
feces11	m6	Ethanol	u109	0/0	1	1	0	0	insufficient_coverage
feces11	m7	Ethanol	u109	0/0	1	1	0	0	insufficient_coverage
feces11	m1	Ethanol	u140	99/99	103	1	1	1	NA
feces11	m2	Ethanol	u140	99/99	40	1	1	1	NA
feces11	m3	Ethanol	u140	0/0	18	1	0	0	insufficient_coverage
feces11	m4	Ethanol	u140	97/99	26	1	1	0	false_allele
feces11	m5	Ethanol	u140	0/0	10	1	0	0	insufficient_coverage
feces11	m6	Ethanol	u140	0/0	14	1	0	0	insufficient_coverage
feces11	m7	Ethanol	u140	99/99	523	1	1	1	NA
feces11	m1	Ethanol	u172	0/0	1	1	0	0	insufficient_coverage
feces11	m2	Ethanol	u172	0/0	5	1	0	0	insufficient_coverage
feces11	m3	Ethanol	u172	0/0	2	1	0	0	insufficient_coverage
feces11	m4	Ethanol	u172	0/0	5	1	0	0	insufficient_coverage
feces11	m5	Ethanol	u172	0/0	1	1	0	0	insufficient_coverage
feces11	m6	Ethanol	u172	0/0	1	1	0	0	insufficient_coverage
feces11	m7	Ethanol	u172	114/114	28	1	1	NA	ambiguous_genotype
feces11	m1	Ethanol	u173	63/63	31	1	1	NA	ambiguous_genotype
feces11	m2	Ethanol	u173	0/0	9	1	0	0	insufficient_coverage
feces11	m3	Ethanol	u173	0/0	4	1	0	0	insufficient_coverage
feces11	m4	Ethanol	u173	0/0	7	1	0	0	insufficient_coverage
feces11	m5	Ethanol	u173	X/X	0	0	0	NA	NA
feces11	m6	Ethanol	u173	0/0	4	1	0	0	insufficient_coverage
feces11	m7	Ethanol	u173	63/63	180	1	1	NA	ambiguous_genotype
feces11	m1	Ethanol	u20	X/X	0	0	0	NA	NA
feces11	m2	Ethanol	u20	X/X	0	0	0	NA	NA
feces11	m3	Ethanol	u20	X/X	0	0	0	NA	NA
feces11	m4	Ethanol	u20	X/X	0	0	0	NA	NA
feces11	m5	Ethanol	u20	X/X	0	0	0	NA	NA
feces11	m6	Ethanol	u20	X/X	0	0	0	NA	NA
feces11	m7	Ethanol	u20	X/X	0	0	0	NA	NA
feces11	m1	Ethanol	u204	X/X	0	0	0	NA	NA
feces11	m2	Ethanol	u204	0/0	6	1	0	0	insufficient_coverage
feces11	m3	Ethanol	u204	0/0	3	1	0	0	insufficient_coverage
feces11	m4	Ethanol	u204	X/X	0	0	0	NA	NA
feces11	m5	Ethanol	u204	0/0	1	1	0	0	insufficient_coverage
feces11	m6	Ethanol	u204	0/0	1	1	0	0	insufficient_coverage
feces11	m7	Ethanol	u204	0/0	12	1	0	0	insufficient_coverage
feces11	m1	Ethanol	u225	0/0	5	1	0	0	insufficient_coverage
feces11	m2	Ethanol	u225	120/120	26	1	1	0	dropout_allele
feces11	m3	Ethanol	u225	120/124	35	1	1	1	NA
feces11	m4	Ethanol	u225	120/124	33	1	1	1	NA
feces11	m5	Ethanol	u225	0/0	9	1	0	0	insufficient_coverage
feces11	m6	Ethanol	u225	0/0	17	1	0	0	insufficient_coverage
feces11	m7	Ethanol	u225	120/124	244	1	1	1	NA
feces11	m1	Ethanol	u250	93/93	69	1	1	1	NA
feces11	m2	Ethanol	u250	91/93	31	1	1	0	false_allele
feces11	m3	Ethanol	u250	93/93	59	1	1	1	NA
feces11	m4	Ethanol	u250	0/0	22	1	0	0	insufficient_coverage
feces11	m5	Ethanol	u250	0/0	18	1	0	0	insufficient_coverage
feces11	m6	Ethanol	u250	93/93	22	1	1	1	NA
feces11	m7	Ethanol	u250	93/93	354	1	1	1	NA
feces11	m1	Ethanol	u253	60/64	36	1	1	1	NA
feces11	m2	Ethanol	u253	0/0	8	1	0	0	insufficient_coverage
feces11	m3	Ethanol	u253	0/0	1	1	0	0	insufficient_coverage
feces11	m4	Ethanol	u253	0/0	10	1	0	0	insufficient_coverage
feces11	m5	Ethanol	u253	0/0	1	1	0	0	insufficient_coverage
feces11	m6	Ethanol	u253	X/X	0	0	0	NA	NA
feces11	m7	Ethanol	u253	60/64	41	1	1	1	NA
feces11	m1	Ethanol	u279	83/83	29	1	1	1	NA
feces11	m2	Ethanol	u279	83/83	78	1	1	1	NA
feces11	m3	Ethanol	u279	83/83	34	1	1	1	NA
feces11	m4	Ethanol	u279	81/83	28	1	1	0	false_allele
feces11	m5	Ethanol	u279	0/0	14	1	0	0	insufficient_coverage
feces11	m6	Ethanol	u279	0/0	17	1	0	0	insufficient_coverage
feces11	m7	Ethanol	u279	83/83	468	1	1	1	NA
feces11	m1	Ethanol	VWF	87/105	59	1	1	1	NA
feces11	m2	Ethanol	VWF	87/105	52	1	1	1	NA
feces11	m3	Ethanol	VWF	87/105	54	1	1	1	NA
feces11	m4	Ethanol	VWF	105/105	51	1	1	0	dropout_allele
feces11	m5	Ethanol	VWF	87/105	40	1	1	1	NA
feces11	m6	Ethanol	VWF	87/105	48	1	1	1	NA
feces11	m7	Ethanol	VWF	105/105	671	1	1	0	dropout_allele
feces11	m1	NAP	366	X/X	0	0	0	NA	NA
feces11	m2	NAP	366	X/X	0	0	0	NA	NA
feces11	m3	NAP	366	X/X	0	0	0	NA	NA
feces11	m4	NAP	366	X/X	0	0	0	NA	NA
feces11	m5	NAP	366	X/X	0	0	0	NA	NA
feces11	m6	NAP	366	X/X	0	0	0	NA	NA
feces11	m7	NAP	366	X/X	0	0	0	NA	NA
feces11	m1	NAP	377	X/X	0	0	0	NA	NA
feces11	m2	NAP	377	X/X	0	0	0	NA	NA
feces11	m3	NAP	377	X/X	0	0	0	NA	NA
feces11	m4	NAP	377	X/X	0	0	0	NA	NA
feces11	m5	NAP	377	X/X	0	0	0	NA	NA
feces11	m6	NAP	377	X/X	0	0	0	NA	NA
feces11	m7	NAP	377	X/X	0	0	0	NA	NA
feces11	m1	NAP	410	X/X	0	0	0	NA	NA
feces11	m2	NAP	410	X/X	0	0	0	NA	NA
feces11	m3	NAP	410	X/X	0	0	0	NA	NA
feces11	m4	NAP	410	X/X	0	0	0	NA	NA
feces11	m5	NAP	410	X/X	0	0	0	NA	NA
feces11	m6	NAP	410	X/X	0	0	0	NA	NA
feces11	m7	NAP	410	X/X	0	0	0	NA	NA
feces11	m1	NAP	442	X/X	0	0	0	NA	NA
feces11	m2	NAP	442	X/X	0	0	0	NA	NA
feces11	m3	NAP	442	X/X	0	0	0	NA	NA
feces11	m4	NAP	442	X/X	0	0	0	NA	NA
feces11	m5	NAP	442	X/X	0	0	0	NA	NA
feces11	m6	NAP	442	X/X	0	0	0	NA	NA
feces11	m7	NAP	442	X/X	0	0	0	NA	NA
feces11	m1	NAP	459	X/X	0	0	0	NA	NA
feces11	m2	NAP	459	X/X	0	0	0	NA	NA
feces11	m3	NAP	459	X/X	0	0	0	NA	NA
feces11	m4	NAP	459	X/X	0	0	0	NA	NA
feces11	m5	NAP	459	X/X	0	0	0	NA	NA
feces11	m6	NAP	459	X/X	0	0	0	NA	NA
feces11	m7	NAP	459	X/X	0	0	0	NA	NA
feces11	m1	NAP	466	X/X	0	0	0	NA	NA
feces11	m2	NAP	466	X/X	0	0	0	NA	NA
feces11	m3	NAP	466	X/X	0	0	0	NA	NA
feces11	m4	NAP	466	X/X	0	0	0	NA	NA
feces11	m5	NAP	466	X/X	0	0	0	NA	NA
feces11	m6	NAP	466	X/X	0	0	0	NA	NA
feces11	m7	NAP	466	X/X	0	0	0	NA	NA
feces11	m1	NAP	474	X/X	0	0	0	NA	NA
feces11	m2	NAP	474	X/X	0	0	0	NA	NA
feces11	m3	NAP	474	X/X	0	0	0	NA	NA
feces11	m4	NAP	474	X/X	0	0	0	NA	NA
feces11	m5	NAP	474	X/X	0	0	0	NA	NA
feces11	m6	NAP	474	X/X	0	0	0	NA	NA
feces11	m7	NAP	474	X/X	0	0	0	NA	NA
feces11	m1	NAP	AHTH171	X/X	0	0	0	NA	NA
feces11	m2	NAP	AHTH171	X/X	0	0	0	NA	NA
feces11	m3	NAP	AHTH171	0/0	1	1	0	0	insufficient_coverage
feces11	m4	NAP	AHTH171	X/X	0	0	0	NA	NA
feces11	m5	NAP	AHTH171	0/0	3	1	0	0	insufficient_coverage
feces11	m6	NAP	AHTH171	X/X	0	0	0	NA	NA
feces11	m7	NAP	AHTH171	X/X	0	0	0	NA	NA
feces11	m1	NAP	c2096	X/X	0	0	0	NA	NA
feces11	m2	NAP	c2096	0/0	1	1	0	0	insufficient_coverage
feces11	m3	NAP	c2096	0/0	1	1	0	0	insufficient_coverage
feces11	m4	NAP	c2096	X/X	0	0	0	NA	NA
feces11	m5	NAP	c2096	0/0	4	1	0	0	insufficient_coverage
feces11	m6	NAP	c2096	0/0	12	1	0	0	insufficient_coverage
feces11	m7	NAP	c2096	X/X	0	0	0	NA	NA
feces11	m1	NAP	c758	X/X	0	0	0	NA	NA
feces11	m2	NAP	c758	X/X	0	0	0	NA	NA
feces11	m3	NAP	c758	X/X	0	0	0	NA	NA
feces11	m4	NAP	c758	X/X	0	0	0	NA	NA
feces11	m5	NAP	c758	X/X	0	0	0	NA	NA
feces11	m6	NAP	c758	X/X	0	0	0	NA	NA
feces11	m7	NAP	c758	X/X	0	0	0	NA	NA
feces11	m1	NAP	CPH2	X/X	0	0	0	NA	NA
feces11	m2	NAP	CPH2	0/0	1	1	0	0	insufficient_coverage
feces11	m3	NAP	CPH2	X/X	0	0	0	NA	NA
feces11	m4	NAP	CPH2	X/X	0	0	0	NA	NA
feces11	m5	NAP	CPH2	0/0	1	1	0	0	insufficient_coverage
feces11	m6	NAP	CPH2	0/0	1	1	0	0	insufficient_coverage
feces11	m7	NAP	CPH2	X/X	0	0	0	NA	NA
feces11	m1	NAP	CPH3	X/X	0	0	0	NA	NA
feces11	m2	NAP	CPH3	X/X	0	0	0	NA	NA
feces11	m3	NAP	CPH3	X/X	0	0	0	NA	NA
feces11	m4	NAP	CPH3	X/X	0	0	0	NA	NA
feces11	m5	NAP	CPH3	X/X	0	0	0	NA	NA
feces11	m6	NAP	CPH3	X/X	0	0	0	NA	NA
feces11	m7	NAP	CPH3	X/X	0	0	0	NA	NA
feces11	m1	NAP	CPH4	X/X	0	0	0	NA	NA
feces11	m2	NAP	CPH4	X/X	0	0	0	NA	NA
feces11	m3	NAP	CPH4	X/X	0	0	0	NA	NA
feces11	m4	NAP	CPH4	X/X	0	0	0	NA	NA
feces11	m5	NAP	CPH4	X/X	0	0	0	NA	NA
feces11	m6	NAP	CPH4	X/X	0	0	0	NA	NA
feces11	m7	NAP	CPH4	X/X	0	0	0	NA	NA
feces11	m1	NAP	CPH5	X/X	0	0	0	NA	NA
feces11	m2	NAP	CPH5	0/0	1	1	0	0	insufficient_coverage
feces11	m3	NAP	CPH5	X/X	0	0	0	NA	NA
feces11	m4	NAP	CPH5	X/X	0	0	0	NA	NA
feces11	m5	NAP	CPH5	X/X	0	0	0	NA	NA
feces11	m6	NAP	CPH5	X/X	0	0	0	NA	NA
feces11	m7	NAP	CPH5	X/X	0	0	0	NA	NA
feces11	m1	NAP	CPH6	0/0	2	1	0	0	insufficient_coverage
feces11	m2	NAP	CPH6	X/X	0	0	0	NA	NA
feces11	m3	NAP	CPH6	0/0	2	1	0	0	insufficient_coverage
feces11	m4	NAP	CPH6	X/X	0	0	0	NA	NA
feces11	m5	NAP	CPH6	0/0	1	1	0	0	insufficient_coverage
feces11	m6	NAP	CPH6	X/X	0	0	0	NA	NA
feces11	m7	NAP	CPH6	X/X	0	0	0	NA	NA
feces11	m1	NAP	CPH7	X/X	0	0	0	NA	NA
feces11	m2	NAP	CPH7	X/X	0	0	0	NA	NA
feces11	m3	NAP	CPH7	X/X	0	0	0	NA	NA
feces11	m4	NAP	CPH7	X/X	0	0	0	NA	NA
feces11	m5	NAP	CPH7	X/X	0	0	0	NA	NA
feces11	m6	NAP	CPH7	X/X	0	0	0	NA	NA
feces11	m7	NAP	CPH7	X/X	0	0	0	NA	NA
feces11	m1	NAP	CPH8	X/X	0	0	0	NA	NA
feces11	m2	NAP	CPH8	X/X	0	0	0	NA	NA
feces11	m3	NAP	CPH8	X/X	0	0	0	NA	NA
feces11	m4	NAP	CPH8	X/X	0	0	0	NA	NA
feces11	m5	NAP	CPH8	X/X	0	0	0	NA	NA
feces11	m6	NAP	CPH8	X/X	0	0	0	NA	NA
feces11	m7	NAP	CPH8	X/X	0	0	0	NA	NA
feces11	m1	NAP	FH2010	X/X	0	0	0	NA	NA
feces11	m2	NAP	FH2010	X/X	0	0	0	NA	NA
feces11	m3	NAP	FH2010	X/X	0	0	0	NA	NA
feces11	m4	NAP	FH2010	X/X	0	0	0	NA	NA
feces11	m5	NAP	FH2010	X/X	0	0	0	NA	NA
feces11	m6	NAP	FH2010	X/X	0	0	0	NA	NA
feces11	m7	NAP	FH2010	X/X	0	0	0	NA	NA
feces11	m1	NAP	FH2054	X/X	0	0	0	NA	NA
feces11	m2	NAP	FH2054	X/X	0	0	0	NA	NA
feces11	m3	NAP	FH2054	X/X	0	0	0	NA	NA
feces11	m4	NAP	FH2054	X/X	0	0	0	NA	NA
feces11	m5	NAP	FH2054	X/X	0	0	0	NA	NA
feces11	m6	NAP	FH2054	X/X	0	0	0	NA	NA
feces11	m7	NAP	FH2054	0/0	1	1	0	0	insufficient_coverage
feces11	m1	NAP	FH2109	X/X	0	0	0	NA	NA
feces11	m2	NAP	FH2109	X/X	0	0	0	NA	NA
feces11	m3	NAP	FH2109	X/X	0	0	0	NA	NA
feces11	m4	NAP	FH2109	X/X	0	0	0	NA	NA
feces11	m5	NAP	FH2109	X/X	0	0	0	NA	NA
feces11	m6	NAP	FH2109	X/X	0	0	0	NA	NA
feces11	m7	NAP	FH2109	X/X	0	0	0	NA	NA
feces11	m1	NAP	Ren49F22	X/X	0	0	0	NA	NA
feces11	m2	NAP	Ren49F22	X/X	0	0	0	NA	NA
feces11	m3	NAP	Ren49F22	X/X	0	0	0	NA	NA
feces11	m4	NAP	Ren49F22	X/X	0	0	0	NA	NA
feces11	m5	NAP	Ren49F22	X/X	0	0	0	NA	NA
feces11	m6	NAP	Ren49F22	X/X	0	0	0	NA	NA
feces11	m7	NAP	Ren49F22	X/X	0	0	0	NA	NA
feces11	m1	NAP	u109	X/X	0	0	0	NA	NA
feces11	m2	NAP	u109	X/X	0	0	0	NA	NA
feces11	m3	NAP	u109	X/X	0	0	0	NA	NA
feces11	m4	NAP	u109	X/X	0	0	0	NA	NA
feces11	m5	NAP	u109	X/X	0	0	0	NA	NA
feces11	m6	NAP	u109	X/X	0	0	0	NA	NA
feces11	m7	NAP	u109	X/X	0	0	0	NA	NA
feces11	m1	NAP	u140	X/X	0	0	0	NA	NA
feces11	m2	NAP	u140	0/0	1	1	0	0	insufficient_coverage
feces11	m3	NAP	u140	0/0	14	1	0	0	insufficient_coverage
feces11	m4	NAP	u140	X/X	0	0	0	NA	NA
feces11	m5	NAP	u140	0/0	2	1	0	0	insufficient_coverage
feces11	m6	NAP	u140	X/X	0	0	0	NA	NA
feces11	m7	NAP	u140	X/X	0	0	0	NA	NA
feces11	m1	NAP	u172	X/X	0	0	0	NA	NA
feces11	m2	NAP	u172	X/X	0	0	0	NA	NA
feces11	m3	NAP	u172	X/X	0	0	0	NA	NA
feces11	m4	NAP	u172	X/X	0	0	0	NA	NA
feces11	m5	NAP	u172	0/0	1	1	0	0	insufficient_coverage
feces11	m6	NAP	u172	X/X	0	0	0	NA	NA
feces11	m7	NAP	u172	X/X	0	0	0	NA	NA
feces11	m1	NAP	u173	X/X	0	0	0	NA	NA
feces11	m2	NAP	u173	X/X	0	0	0	NA	NA
feces11	m3	NAP	u173	0/0	1	1	0	0	insufficient_coverage
feces11	m4	NAP	u173	0/0	2	1	0	0	insufficient_coverage
feces11	m5	NAP	u173	X/X	0	0	0	NA	NA
feces11	m6	NAP	u173	X/X	0	0	0	NA	NA
feces11	m7	NAP	u173	X/X	0	0	0	NA	NA
feces11	m1	NAP	u20	X/X	0	0	0	NA	NA
feces11	m2	NAP	u20	X/X	0	0	0	NA	NA
feces11	m3	NAP	u20	X/X	0	0	0	NA	NA
feces11	m4	NAP	u20	X/X	0	0	0	NA	NA
feces11	m5	NAP	u20	X/X	0	0	0	NA	NA
feces11	m6	NAP	u20	X/X	0	0	0	NA	NA
feces11	m7	NAP	u20	X/X	0	0	0	NA	NA
feces11	m1	NAP	u204	X/X	0	0	0	NA	NA
feces11	m2	NAP	u204	X/X	0	0	0	NA	NA
feces11	m3	NAP	u204	X/X	0	0	0	NA	NA
feces11	m4	NAP	u204	X/X	0	0	0	NA	NA
feces11	m5	NAP	u204	X/X	0	0	0	NA	NA
feces11	m6	NAP	u204	X/X	0	0	0	NA	NA
feces11	m7	NAP	u204	X/X	0	0	0	NA	NA
feces11	m1	NAP	u225	X/X	0	0	0	NA	NA
feces11	m2	NAP	u225	0/0	7	1	0	0	insufficient_coverage
feces11	m3	NAP	u225	X/X	0	0	0	NA	NA
feces11	m4	NAP	u225	0/0	8	1	0	0	insufficient_coverage
feces11	m5	NAP	u225	X/X	0	0	0	NA	NA
feces11	m6	NAP	u225	X/X	0	0	0	NA	NA
feces11	m7	NAP	u225	X/X	0	0	0	NA	NA
feces11	m1	NAP	u250	0/0	1	1	0	0	insufficient_coverage
feces11	m2	NAP	u250	0/0	3	1	0	0	insufficient_coverage
feces11	m3	NAP	u250	X/X	0	0	0	NA	NA
feces11	m4	NAP	u250	0/0	21	1	0	0	insufficient_coverage
feces11	m5	NAP	u250	X/X	0	0	0	NA	NA
feces11	m6	NAP	u250	X/X	0	0	0	NA	NA
feces11	m7	NAP	u250	0/0	4	1	0	0	insufficient_coverage
feces11	m1	NAP	u253	X/X	0	0	0	NA	NA
feces11	m2	NAP	u253	X/X	0	0	0	NA	NA
feces11	m3	NAP	u253	X/X	0	0	0	NA	NA
feces11	m4	NAP	u253	X/X	0	0	0	NA	NA
feces11	m5	NAP	u253	X/X	0	0	0	NA	NA
feces11	m6	NAP	u253	0/0	1	1	0	0	insufficient_coverage
feces11	m7	NAP	u253	X/X	0	0	0	NA	NA
feces11	m1	NAP	u279	X/X	0	0	0	NA	NA
feces11	m2	NAP	u279	0/0	3	1	0	0	insufficient_coverage
feces11	m3	NAP	u279	X/X	0	0	0	NA	NA
feces11	m4	NAP	u279	X/X	0	0	0	NA	NA
feces11	m5	NAP	u279	X/X	0	0	0	NA	NA
feces11	m6	NAP	u279	0/0	4	1	0	0	insufficient_coverage
feces11	m7	NAP	u279	X/X	0	0	0	NA	NA
feces11	m1	NAP	VWF	105/105	33	1	1	0	dropout_allele
feces11	m2	NAP	VWF	0/0	1	1	0	0	insufficient_coverage
feces11	m3	NAP	VWF	0/0	1	1	0	0	insufficient_coverage
feces11	m4	NAP	VWF	X/X	0	0	0	NA	NA
feces11	m5	NAP	VWF	X/X	0	0	0	NA	NA
feces11	m6	NAP	VWF	X/X	0	0	0	NA	NA
feces11	m7	NAP	VWF	X/X	0	0	0	NA	NA
feces12	m1	Ethanol	366	0/0	12	1	0	0	insufficient_coverage
feces12	m2	Ethanol	366	136/136	32	1	1	1	NA
feces12	m3	Ethanol	366	136/136	32	1	1	1	NA
feces12	m4	Ethanol	366	136/136	58	1	1	1	NA
feces12	m5	Ethanol	366	0/0	4	1	0	0	insufficient_coverage
feces12	m6	Ethanol	366	0/0	17	1	0	0	insufficient_coverage
feces12	m7	Ethanol	366	0/0	8	1	0	0	insufficient_coverage
feces12	m1	Ethanol	377	122/126	108	1	1	1	NA
feces12	m2	Ethanol	377	122/126	68	1	1	1	NA
feces12	m3	Ethanol	377	120/124	44	1	1	0	false_allele
feces12	m4	Ethanol	377	Unscored/Unscored	110	1	0	0	Unscored
feces12	m5	Ethanol	377	0/0	6	1	0	0	insufficient_coverage
feces12	m6	Ethanol	377	Unscored/Unscored	70	1	0	0	Unscored
feces12	m7	Ethanol	377	120/122	105	1	1	0	false_allele
feces12	m1	Ethanol	410	72/78	101	1	1	1	NA
feces12	m2	Ethanol	410	0/0	30	1	0	0	insufficient_coverage
feces12	m3	Ethanol	410	0/0	21	1	0	0	insufficient_coverage
feces12	m4	Ethanol	410	72/78	46	1	1	1	NA
feces12	m5	Ethanol	410	0/0	2	1	0	0	insufficient_coverage
feces12	m6	Ethanol	410	0/0	21	1	0	0	insufficient_coverage
feces12	m7	Ethanol	410	Unscored/Unscored	59	1	0	0	Unscored
feces12	m1	Ethanol	442	0/0	1	1	0	0	insufficient_coverage
feces12	m2	Ethanol	442	0/0	4	1	0	0	insufficient_coverage
feces12	m3	Ethanol	442	0/0	3	1	0	0	insufficient_coverage
feces12	m4	Ethanol	442	123/123	26	1	1	NA	ambiguous_genotype
feces12	m5	Ethanol	442	X/X	0	0	0	NA	NA
feces12	m6	Ethanol	442	0/0	6	1	0	0	insufficient_coverage
feces12	m7	Ethanol	442	0/0	8	1	0	0	insufficient_coverage
feces12	m1	Ethanol	459	X/X	0	0	0	NA	NA
feces12	m2	Ethanol	459	X/X	0	0	0	NA	NA
feces12	m3	Ethanol	459	X/X	0	0	0	NA	NA
feces12	m4	Ethanol	459	X/X	0	0	0	NA	NA
feces12	m5	Ethanol	459	X/X	0	0	0	NA	NA
feces12	m6	Ethanol	459	X/X	0	0	0	NA	NA
feces12	m7	Ethanol	459	X/X	0	0	0	NA	NA
feces12	m1	Ethanol	466	113/113	38	1	1	1	NA
feces12	m2	Ethanol	466	0/0	19	1	0	0	insufficient_coverage
feces12	m3	Ethanol	466	113/113	26	1	1	1	NA
feces12	m4	Ethanol	466	113/113	56	1	1	1	NA
feces12	m5	Ethanol	466	0/0	3	1	0	0	insufficient_coverage
feces12	m6	Ethanol	466	113/113	39	1	1	1	NA
feces12	m7	Ethanol	466	0/0	19	1	0	0	insufficient_coverage
feces12	m1	Ethanol	474	0/0	15	1	0	0	insufficient_coverage
feces12	m2	Ethanol	474	0/0	18	1	0	0	insufficient_coverage
feces12	m3	Ethanol	474	0/0	17	1	0	0	insufficient_coverage
feces12	m4	Ethanol	474	0/0	10	1	0	0	insufficient_coverage
feces12	m5	Ethanol	474	X/X	0	0	0	NA	NA
feces12	m6	Ethanol	474	0/0	18	1	0	0	insufficient_coverage
feces12	m7	Ethanol	474	0/0	6	1	0	0	insufficient_coverage
feces12	m1	Ethanol	AHTH171	0/0	31	1	0	0	insufficient_coverage
feces12	m2	Ethanol	AHTH171	0/0	9	1	0	0	insufficient_coverage
feces12	m3	Ethanol	AHTH171	0/0	21	1	0	0	insufficient_coverage
feces12	m4	Ethanol	AHTH171	82/92	39	1	1	NA	ambiguous_genotype
feces12	m5	Ethanol	AHTH171	X/X	0	0	0	NA	NA
feces12	m6	Ethanol	AHTH171	0/0	11	1	0	0	insufficient_coverage
feces12	m7	Ethanol	AHTH171	0/0	24	1	0	0	insufficient_coverage
feces12	m1	Ethanol	c2096	57/61	76	1	1	1	NA
feces12	m2	Ethanol	c2096	57/61	23	1	1	1	NA
feces12	m3	Ethanol	c2096	0/0	10	1	0	0	insufficient_coverage
feces12	m4	Ethanol	c2096	57/61	50	1	1	1	NA
feces12	m5	Ethanol	c2096	X/X	0	0	0	NA	NA
feces12	m6	Ethanol	c2096	0/0	7	1	0	0	insufficient_coverage
feces12	m7	Ethanol	c2096	0/0	18	1	0	0	insufficient_coverage
feces12	m1	Ethanol	c758	X/X	0	0	0	NA	NA
feces12	m2	Ethanol	c758	X/X	0	0	0	NA	NA
feces12	m3	Ethanol	c758	X/X	0	0	0	NA	NA
feces12	m4	Ethanol	c758	0/0	1	1	0	0	insufficient_coverage
feces12	m5	Ethanol	c758	X/X	0	0	0	NA	NA
feces12	m6	Ethanol	c758	0/0	3	1	0	0	insufficient_coverage
feces12	m7	Ethanol	c758	X/X	0	0	0	NA	NA
feces12	m1	Ethanol	CPH2	56/60	217	1	1	1	NA
feces12	m2	Ethanol	CPH2	60/60	130	1	1	0	dropout_allele
feces12	m3	Ethanol	CPH2	56/60	54	1	1	1	NA
feces12	m4	Ethanol	CPH2	60/60	174	1	1	0	dropout_allele
feces12	m5	Ethanol	CPH2	0/0	3	1	0	0	insufficient_coverage
feces12	m6	Ethanol	CPH2	58/60	38	1	1	0	false_allele
feces12	m7	Ethanol	CPH2	60/60	130	1	1	0	dropout_allele
feces12	m1	Ethanol	CPH3	X/X	0	0	0	NA	NA
feces12	m2	Ethanol	CPH3	X/X	0	0	0	NA	NA
feces12	m3	Ethanol	CPH3	0/0	1	1	0	0	insufficient_coverage
feces12	m4	Ethanol	CPH3	X/X	0	0	0	NA	NA
feces12	m5	Ethanol	CPH3	X/X	0	0	0	NA	NA
feces12	m6	Ethanol	CPH3	0/0	1	1	0	0	insufficient_coverage
feces12	m7	Ethanol	CPH3	0/0	1	1	0	0	insufficient_coverage
feces12	m1	Ethanol	CPH4	X/X	0	0	0	NA	NA
feces12	m2	Ethanol	CPH4	0/0	1	1	0	0	insufficient_coverage
feces12	m3	Ethanol	CPH4	0/0	1	1	0	0	insufficient_coverage
feces12	m4	Ethanol	CPH4	0/0	6	1	0	0	insufficient_coverage
feces12	m5	Ethanol	CPH4	X/X	0	0	0	NA	NA
feces12	m6	Ethanol	CPH4	X/X	0	0	0	NA	NA
feces12	m7	Ethanol	CPH4	X/X	0	0	0	NA	NA
feces12	m1	Ethanol	CPH5	0/0	15	1	0	0	insufficient_coverage
feces12	m2	Ethanol	CPH5	88/88	28	1	1	NA	ambiguous_genotype
feces12	m3	Ethanol	CPH5	0/0	19	1	0	0	insufficient_coverage
feces12	m4	Ethanol	CPH5	86/88	47	1	1	NA	ambiguous_genotype
feces12	m5	Ethanol	CPH5	0/0	2	1	0	0	insufficient_coverage
feces12	m6	Ethanol	CPH5	0/0	22	1	0	0	insufficient_coverage
feces12	m7	Ethanol	CPH5	88/90	39	1	1	NA	ambiguous_genotype
feces12	m1	Ethanol	CPH6	82/86	59	1	1	1	NA
feces12	m2	Ethanol	CPH6	82/86	56	1	1	1	NA
feces12	m3	Ethanol	CPH6	82/86	79	1	1	1	NA
feces12	m4	Ethanol	CPH6	82/86	128	1	1	1	NA
feces12	m5	Ethanol	CPH6	0/0	4	1	0	0	insufficient_coverage
feces12	m6	Ethanol	CPH6	82/86	43	1	1	1	NA
feces12	m7	Ethanol	CPH6	82/86	56	1	1	1	NA
feces12	m1	Ethanol	CPH7	0/0	8	1	0	0	insufficient_coverage
feces12	m2	Ethanol	CPH7	126/128	42	1	1	NA	ambiguous_genotype
feces12	m3	Ethanol	CPH7	128/128	31	1	1	NA	ambiguous_genotype
feces12	m4	Ethanol	CPH7	0/0	24	1	0	0	insufficient_coverage
feces12	m5	Ethanol	CPH7	0/0	1	1	0	0	insufficient_coverage
feces12	m6	Ethanol	CPH7	0/0	18	1	0	0	insufficient_coverage
feces12	m7	Ethanol	CPH7	0/0	23	1	0	0	insufficient_coverage
feces12	m1	Ethanol	CPH8	0/0	1	1	0	0	insufficient_coverage
feces12	m2	Ethanol	CPH8	0/0	9	1	0	0	insufficient_coverage
feces12	m3	Ethanol	CPH8	0/0	11	1	0	0	insufficient_coverage
feces12	m4	Ethanol	CPH8	162/162	44	1	1	NA	ambiguous_genotype
feces12	m5	Ethanol	CPH8	X/X	0	0	0	NA	NA
feces12	m6	Ethanol	CPH8	0/0	13	1	0	0	insufficient_coverage
feces12	m7	Ethanol	CPH8	0/0	1	1	0	0	insufficient_coverage
feces12	m1	Ethanol	FH2010	X/X	0	0	0	NA	NA
feces12	m2	Ethanol	FH2010	X/X	0	0	0	NA	NA
feces12	m3	Ethanol	FH2010	X/X	0	0	0	NA	NA
feces12	m4	Ethanol	FH2010	0/0	1	1	0	0	insufficient_coverage
feces12	m5	Ethanol	FH2010	X/X	0	0	0	NA	NA
feces12	m6	Ethanol	FH2010	X/X	0	0	0	NA	NA
feces12	m7	Ethanol	FH2010	X/X	0	0	0	NA	NA
feces12	m1	Ethanol	FH2054	0/0	1	1	0	0	insufficient_coverage
feces12	m2	Ethanol	FH2054	0/0	5	1	0	0	insufficient_coverage
feces12	m3	Ethanol	FH2054	0/0	3	1	0	0	insufficient_coverage
feces12	m4	Ethanol	FH2054	0/0	1	1	0	0	insufficient_coverage
feces12	m5	Ethanol	FH2054	X/X	0	0	0	NA	NA
feces12	m6	Ethanol	FH2054	0/0	1	1	0	0	insufficient_coverage
feces12	m7	Ethanol	FH2054	X/X	0	0	0	NA	NA
feces12	m1	Ethanol	FH2109	X/X	0	0	0	NA	NA
feces12	m2	Ethanol	FH2109	0/0	9	1	0	0	insufficient_coverage
feces12	m3	Ethanol	FH2109	0/0	1	1	0	0	insufficient_coverage
feces12	m4	Ethanol	FH2109	0/0	8	1	0	0	insufficient_coverage
feces12	m5	Ethanol	FH2109	X/X	0	0	0	NA	NA
feces12	m6	Ethanol	FH2109	0/0	6	1	0	0	insufficient_coverage
feces12	m7	Ethanol	FH2109	X/X	0	0	0	NA	NA
feces12	m1	Ethanol	Ren49F22	0/0	2	1	0	0	insufficient_coverage
feces12	m2	Ethanol	Ren49F22	0/0	1	1	0	0	insufficient_coverage
feces12	m3	Ethanol	Ren49F22	X/X	0	0	0	NA	NA
feces12	m4	Ethanol	Ren49F22	0/0	2	1	0	0	insufficient_coverage
feces12	m5	Ethanol	Ren49F22	X/X	0	0	0	NA	NA
feces12	m6	Ethanol	Ren49F22	X/X	0	0	0	NA	NA
feces12	m7	Ethanol	Ren49F22	X/X	0	0	0	NA	NA
feces12	m1	Ethanol	u109	0/0	16	1	0	0	insufficient_coverage
feces12	m2	Ethanol	u109	100/104	66	1	1	1	NA
feces12	m3	Ethanol	u109	100/104	36	1	1	1	NA
feces12	m4	Ethanol	u109	100/104	158	1	1	1	NA
feces12	m5	Ethanol	u109	0/0	4	1	0	0	insufficient_coverage
feces12	m6	Ethanol	u109	100/104	43	1	1	1	NA
feces12	m7	Ethanol	u109	0/0	16	1	0	0	insufficient_coverage
feces12	m1	Ethanol	u140	89/89	374	1	1	1	NA
feces12	m2	Ethanol	u140	89/89	135	1	1	1	NA
feces12	m3	Ethanol	u140	89/89	155	1	1	1	NA
feces12	m4	Ethanol	u140	89/89	632	1	1	1	NA
feces12	m5	Ethanol	u140	0/0	15	1	0	0	insufficient_coverage
feces12	m6	Ethanol	u140	89/89	194	1	1	1	NA
feces12	m7	Ethanol	u140	89/89	204	1	1	1	NA
feces12	m1	Ethanol	u172	114/114	115	1	1	1	NA
feces12	m2	Ethanol	u172	114/114	63	1	1	1	NA
feces12	m3	Ethanol	u172	114/114	25	1	1	1	NA
feces12	m4	Ethanol	u172	114/114	143	1	1	1	NA
feces12	m5	Ethanol	u172	0/0	4	1	0	0	insufficient_coverage
feces12	m6	Ethanol	u172	114/114	46	1	1	1	NA
feces12	m7	Ethanol	u172	114/114	74	1	1	1	NA
feces12	m1	Ethanol	u173	63/65	159	1	1	1	NA
feces12	m2	Ethanol	u173	63/65	66	1	1	1	NA
feces12	m3	Ethanol	u173	63/65	110	1	1	1	NA
feces12	m4	Ethanol	u173	63/65	166	1	1	1	NA
feces12	m5	Ethanol	u173	0/0	3	1	0	0	insufficient_coverage
feces12	m6	Ethanol	u173	0/0	29	1	0	0	insufficient_coverage
feces12	m7	Ethanol	u173	63/65	35	1	1	1	NA
feces12	m1	Ethanol	u20	0/0	1	1	0	0	insufficient_coverage
feces12	m2	Ethanol	u20	X/X	0	0	0	NA	NA
feces12	m3	Ethanol	u20	0/0	5	1	0	0	insufficient_coverage
feces12	m4	Ethanol	u20	0/0	5	1	0	0	insufficient_coverage
feces12	m5	Ethanol	u20	X/X	0	0	0	NA	NA
feces12	m6	Ethanol	u20	0/0	1	1	0	0	insufficient_coverage
feces12	m7	Ethanol	u20	0/0	4	1	0	0	insufficient_coverage
feces12	m1	Ethanol	u204	0/0	7	1	0	0	insufficient_coverage
feces12	m2	Ethanol	u204	162/162	87	1	1	1	NA
feces12	m3	Ethanol	u204	162/162	26	1	1	1	NA
feces12	m4	Ethanol	u204	162/162	170	1	1	1	NA
feces12	m5	Ethanol	u204	0/0	2	1	0	0	insufficient_coverage
feces12	m6	Ethanol	u204	162/162	22	1	1	1	NA
feces12	m7	Ethanol	u204	0/0	15	1	0	0	insufficient_coverage
feces12	m1	Ethanol	u225	124/124	121	1	1	0	dropout_allele
feces12	m2	Ethanol	u225	124/124	91	1	1	0	dropout_allele
feces12	m3	Ethanol	u225	120/124	77	1	1	1	NA
feces12	m4	Ethanol	u225	0/0	33	1	0	0	insufficient_coverage
feces12	m5	Ethanol	u225	X/X	0	0	0	NA	NA
feces12	m6	Ethanol	u225	0/0	24	1	0	0	insufficient_coverage
feces12	m7	Ethanol	u225	120/120	33	1	1	0	dropout_allele
feces12	m1	Ethanol	u250	93/93	565	1	1	0	dropout_allele
feces12	m2	Ethanol	u250	91/93	270	1	1	1	NA
feces12	m3	Ethanol	u250	93/93	255	1	1	0	dropout_allele
feces12	m4	Ethanol	u250	93/93	397	1	1	0	dropout_allele
feces12	m5	Ethanol	u250	0/0	25	1	0	0	insufficient_coverage
feces12	m6	Ethanol	u250	91/93	169	1	1	1	NA
feces12	m7	Ethanol	u250	93/93	226	1	1	0	dropout_allele
feces12	m1	Ethanol	u253	64/64	58	1	1	1	NA
feces12	m2	Ethanol	u253	64/64	25	1	1	1	NA
feces12	m3	Ethanol	u253	0/0	9	1	0	0	insufficient_coverage
feces12	m4	Ethanol	u253	64/64	25	1	1	1	NA
feces12	m5	Ethanol	u253	0/0	3	1	0	0	insufficient_coverage
feces12	m6	Ethanol	u253	0/0	11	1	0	0	insufficient_coverage
feces12	m7	Ethanol	u253	64/64	25	1	1	1	NA
feces12	m1	Ethanol	u279	83/89	397	1	1	1	NA
feces12	m2	Ethanol	u279	Unscored/Unscored	256	1	0	0	Unscored
feces12	m3	Ethanol	u279	83/89	190	1	1	1	NA
feces12	m4	Ethanol	u279	83/89	419	1	1	1	NA
feces12	m5	Ethanol	u279	0/0	12	1	0	0	insufficient_coverage
feces12	m6	Ethanol	u279	89/89	156	1	1	0	dropout_allele
feces12	m7	Ethanol	u279	83/89	191	1	1	1	NA
feces12	m1	Ethanol	VWF	X/X	0	0	0	NA	NA
feces12	m2	Ethanol	VWF	87/111	66	1	1	1	NA
feces12	m3	Ethanol	VWF	111/111	67	1	1	0	dropout_allele
feces12	m4	Ethanol	VWF	87/111	139	1	1	1	NA
feces12	m5	Ethanol	VWF	X/X	0	0	0	NA	NA
feces12	m6	Ethanol	VWF	111/111	27	1	1	0	dropout_allele
feces12	m7	Ethanol	VWF	0/0	11	1	0	0	insufficient_coverage
feces12	m1	NAP	366	0/0	4	1	0	0	insufficient_coverage
feces12	m2	NAP	366	0/0	6	1	0	0	insufficient_coverage
feces12	m3	NAP	366	0/0	24	1	0	0	insufficient_coverage
feces12	m4	NAP	366	0/0	1	1	0	0	insufficient_coverage
feces12	m5	NAP	366	0/0	6	1	0	0	insufficient_coverage
feces12	m6	NAP	366	0/0	1	1	0	0	insufficient_coverage
feces12	m7	NAP	366	0/0	1	1	0	0	insufficient_coverage
feces12	m1	NAP	377	124/126	77	1	1	0	false_allele
feces12	m2	NAP	377	0/0	14	1	0	0	insufficient_coverage
feces12	m3	NAP	377	0/0	22	1	0	0	insufficient_coverage
feces12	m4	NAP	377	0/0	7	1	0	0	insufficient_coverage
feces12	m5	NAP	377	0/0	21	1	0	0	insufficient_coverage
feces12	m6	NAP	377	0/0	4	1	0	0	insufficient_coverage
feces12	m7	NAP	377	X/X	0	0	0	NA	NA
feces12	m1	NAP	410	0/0	9	1	0	0	insufficient_coverage
feces12	m2	NAP	410	0/0	14	1	0	0	insufficient_coverage
feces12	m3	NAP	410	0/0	7	1	0	0	insufficient_coverage
feces12	m4	NAP	410	0/0	7	1	0	0	insufficient_coverage
feces12	m5	NAP	410	0/0	5	1	0	0	insufficient_coverage
feces12	m6	NAP	410	0/0	5	1	0	0	insufficient_coverage
feces12	m7	NAP	410	0/0	5	1	0	0	insufficient_coverage
feces12	m1	NAP	442	0/0	3	1	0	0	insufficient_coverage
feces12	m2	NAP	442	X/X	0	0	0	NA	NA
feces12	m3	NAP	442	X/X	0	0	0	NA	NA
feces12	m4	NAP	442	X/X	0	0	0	NA	NA
feces12	m5	NAP	442	0/0	1	1	0	0	insufficient_coverage
feces12	m6	NAP	442	X/X	0	0	0	NA	NA
feces12	m7	NAP	442	0/0	1	1	0	0	insufficient_coverage
feces12	m1	NAP	459	X/X	0	0	0	NA	NA
feces12	m2	NAP	459	X/X	0	0	0	NA	NA
feces12	m3	NAP	459	X/X	0	0	0	NA	NA
feces12	m4	NAP	459	X/X	0	0	0	NA	NA
feces12	m5	NAP	459	X/X	0	0	0	NA	NA
feces12	m6	NAP	459	X/X	0	0	0	NA	NA
feces12	m7	NAP	459	0/0	1	1	0	0	insufficient_coverage
feces12	m1	NAP	466	X/X	0	0	0	NA	NA
feces12	m2	NAP	466	0/0	1	1	0	0	insufficient_coverage
feces12	m3	NAP	466	0/0	2	1	0	0	insufficient_coverage
feces12	m4	NAP	466	0/0	1	1	0	0	insufficient_coverage
feces12	m5	NAP	466	0/0	3	1	0	0	insufficient_coverage
feces12	m6	NAP	466	0/0	4	1	0	0	insufficient_coverage
feces12	m7	NAP	466	X/X	0	0	0	NA	NA
feces12	m1	NAP	474	0/0	4	1	0	0	insufficient_coverage
feces12	m2	NAP	474	0/0	3	1	0	0	insufficient_coverage
feces12	m3	NAP	474	0/0	14	1	0	0	insufficient_coverage
feces12	m4	NAP	474	0/0	3	1	0	0	insufficient_coverage
feces12	m5	NAP	474	0/0	1	1	0	0	insufficient_coverage
feces12	m6	NAP	474	0/0	2	1	0	0	insufficient_coverage
feces12	m7	NAP	474	0/0	8	1	0	0	insufficient_coverage
feces12	m1	NAP	AHTH171	82/82	37	1	1	NA	ambiguous_genotype
feces12	m2	NAP	AHTH171	0/0	17	1	0	0	insufficient_coverage
feces12	m3	NAP	AHTH171	0/0	7	1	0	0	insufficient_coverage
feces12	m4	NAP	AHTH171	0/0	4	1	0	0	insufficient_coverage
feces12	m5	NAP	AHTH171	0/0	10	1	0	0	insufficient_coverage
feces12	m6	NAP	AHTH171	0/0	10	1	0	0	insufficient_coverage
feces12	m7	NAP	AHTH171	0/0	7	1	0	0	insufficient_coverage
feces12	m1	NAP	c2096	57/61	43	1	1	1	NA
feces12	m2	NAP	c2096	61/61	21	1	1	0	dropout_allele
feces12	m3	NAP	c2096	0/0	7	1	0	0	insufficient_coverage
feces12	m4	NAP	c2096	0/0	11	1	0	0	insufficient_coverage
feces12	m5	NAP	c2096	0/0	14	1	0	0	insufficient_coverage
feces12	m6	NAP	c2096	0/0	9	1	0	0	insufficient_coverage
feces12	m7	NAP	c2096	0/0	6	1	0	0	insufficient_coverage
feces12	m1	NAP	c758	X/X	0	0	0	NA	NA
feces12	m2	NAP	c758	X/X	0	0	0	NA	NA
feces12	m3	NAP	c758	X/X	0	0	0	NA	NA
feces12	m4	NAP	c758	X/X	0	0	0	NA	NA
feces12	m5	NAP	c758	X/X	0	0	0	NA	NA
feces12	m6	NAP	c758	X/X	0	0	0	NA	NA
feces12	m7	NAP	c758	X/X	0	0	0	NA	NA
feces12	m1	NAP	CPH2	56/60	56	1	1	1	NA
feces12	m2	NAP	CPH2	0/0	11	1	0	0	insufficient_coverage
feces12	m3	NAP	CPH2	0/0	25	1	0	0	insufficient_coverage
feces12	m4	NAP	CPH2	0/0	7	1	0	0	insufficient_coverage
feces12	m5	NAP	CPH2	0/0	15	1	0	0	insufficient_coverage
feces12	m6	NAP	CPH2	0/0	15	1	0	0	insufficient_coverage
feces12	m7	NAP	CPH2	60/60	33	1	1	0	dropout_allele
feces12	m1	NAP	CPH3	0/0	2	1	0	0	insufficient_coverage
feces12	m2	NAP	CPH3	X/X	0	0	0	NA	NA
feces12	m3	NAP	CPH3	X/X	0	0	0	NA	NA
feces12	m4	NAP	CPH3	0/0	1	1	0	0	insufficient_coverage
feces12	m5	NAP	CPH3	X/X	0	0	0	NA	NA
feces12	m6	NAP	CPH3	X/X	0	0	0	NA	NA
feces12	m7	NAP	CPH3	X/X	0	0	0	NA	NA
feces12	m1	NAP	CPH4	X/X	0	0	0	NA	NA
feces12	m2	NAP	CPH4	X/X	0	0	0	NA	NA
feces12	m3	NAP	CPH4	X/X	0	0	0	NA	NA
feces12	m4	NAP	CPH4	0/0	1	1	0	0	insufficient_coverage
feces12	m5	NAP	CPH4	X/X	0	0	0	NA	NA
feces12	m6	NAP	CPH4	0/0	1	1	0	0	insufficient_coverage
feces12	m7	NAP	CPH4	X/X	0	0	0	NA	NA
feces12	m1	NAP	CPH5	0/0	15	1	0	0	insufficient_coverage
feces12	m2	NAP	CPH5	0/0	2	1	0	0	insufficient_coverage
feces12	m3	NAP	CPH5	0/0	3	1	0	0	insufficient_coverage
feces12	m4	NAP	CPH5	0/0	7	1	0	0	insufficient_coverage
feces12	m5	NAP	CPH5	0/0	2	1	0	0	insufficient_coverage
feces12	m6	NAP	CPH5	0/0	1	1	0	0	insufficient_coverage
feces12	m7	NAP	CPH5	0/0	10	1	0	0	insufficient_coverage
feces12	m1	NAP	CPH6	82/86	56	1	1	1	NA
feces12	m2	NAP	CPH6	0/0	17	1	0	0	insufficient_coverage
feces12	m3	NAP	CPH6	0/0	11	1	0	0	insufficient_coverage
feces12	m4	NAP	CPH6	0/0	21	1	0	0	insufficient_coverage
feces12	m5	NAP	CPH6	0/0	11	1	0	0	insufficient_coverage
feces12	m6	NAP	CPH6	0/0	23	1	0	0	insufficient_coverage
feces12	m7	NAP	CPH6	0/0	13	1	0	0	insufficient_coverage
feces12	m1	NAP	CPH7	128/128	29	1	1	NA	ambiguous_genotype
feces12	m2	NAP	CPH7	X/X	0	0	0	NA	NA
feces12	m3	NAP	CPH7	X/X	0	0	0	NA	NA
feces12	m4	NAP	CPH7	0/0	9	1	0	0	insufficient_coverage
feces12	m5	NAP	CPH7	X/X	0	0	0	NA	NA
feces12	m6	NAP	CPH7	0/0	1	1	0	0	insufficient_coverage
feces12	m7	NAP	CPH7	X/X	0	0	0	NA	NA
feces12	m1	NAP	CPH8	0/0	1	1	0	0	insufficient_coverage
feces12	m2	NAP	CPH8	0/0	1	1	0	0	insufficient_coverage
feces12	m3	NAP	CPH8	X/X	0	0	0	NA	NA
feces12	m4	NAP	CPH8	X/X	0	0	0	NA	NA
feces12	m5	NAP	CPH8	X/X	0	0	0	NA	NA
feces12	m6	NAP	CPH8	0/0	5	1	0	0	insufficient_coverage
feces12	m7	NAP	CPH8	0/0	2	1	0	0	insufficient_coverage
feces12	m1	NAP	FH2010	X/X	0	0	0	NA	NA
feces12	m2	NAP	FH2010	X/X	0	0	0	NA	NA
feces12	m3	NAP	FH2010	X/X	0	0	0	NA	NA
feces12	m4	NAP	FH2010	X/X	0	0	0	NA	NA
feces12	m5	NAP	FH2010	X/X	0	0	0	NA	NA
feces12	m6	NAP	FH2010	X/X	0	0	0	NA	NA
feces12	m7	NAP	FH2010	X/X	0	0	0	NA	NA
feces12	m1	NAP	FH2054	0/0	2	1	0	0	insufficient_coverage
feces12	m2	NAP	FH2054	X/X	0	0	0	NA	NA
feces12	m3	NAP	FH2054	X/X	0	0	0	NA	NA
feces12	m4	NAP	FH2054	0/0	2	1	0	0	insufficient_coverage
feces12	m5	NAP	FH2054	X/X	0	0	0	NA	NA
feces12	m6	NAP	FH2054	X/X	0	0	0	NA	NA
feces12	m7	NAP	FH2054	X/X	0	0	0	NA	NA
feces12	m1	NAP	FH2109	X/X	0	0	0	NA	NA
feces12	m2	NAP	FH2109	0/0	5	1	0	0	insufficient_coverage
feces12	m3	NAP	FH2109	X/X	0	0	0	NA	NA
feces12	m4	NAP	FH2109	X/X	0	0	0	NA	NA
feces12	m5	NAP	FH2109	0/0	3	1	0	0	insufficient_coverage
feces12	m6	NAP	FH2109	0/0	1	1	0	0	insufficient_coverage
feces12	m7	NAP	FH2109	X/X	0	0	0	NA	NA
feces12	m1	NAP	Ren49F22	X/X	0	0	0	NA	NA
feces12	m2	NAP	Ren49F22	X/X	0	0	0	NA	NA
feces12	m3	NAP	Ren49F22	X/X	0	0	0	NA	NA
feces12	m4	NAP	Ren49F22	X/X	0	0	0	NA	NA
feces12	m5	NAP	Ren49F22	X/X	0	0	0	NA	NA
feces12	m6	NAP	Ren49F22	X/X	0	0	0	NA	NA
feces12	m7	NAP	Ren49F22	X/X	0	0	0	NA	NA
feces12	m1	NAP	u109	0/0	20	1	0	0	insufficient_coverage
feces12	m2	NAP	u109	0/0	3	1	0	0	insufficient_coverage
feces12	m3	NAP	u109	0/0	5	1	0	0	insufficient_coverage
feces12	m4	NAP	u109	0/0	21	1	0	0	insufficient_coverage
feces12	m5	NAP	u109	0/0	5	1	0	0	insufficient_coverage
feces12	m6	NAP	u109	0/0	1	1	0	0	insufficient_coverage
feces12	m7	NAP	u109	0/0	2	1	0	0	insufficient_coverage
feces12	m1	NAP	u140	87/89	93	1	1	0	false_allele
feces12	m2	NAP	u140	89/89	34	1	1	1	NA
feces12	m3	NAP	u140	89/89	38	1	1	1	NA
feces12	m4	NAP	u140	89/89	34	1	1	1	NA
feces12	m5	NAP	u140	0/0	18	1	0	0	insufficient_coverage
feces12	m6	NAP	u140	89/89	70	1	1	1	NA
feces12	m7	NAP	u140	89/89	62	1	1	1	NA
feces12	m1	NAP	u172	0/0	7	1	0	0	insufficient_coverage
feces12	m2	NAP	u172	0/0	2	1	0	0	insufficient_coverage
feces12	m3	NAP	u172	0/0	10	1	0	0	insufficient_coverage
feces12	m4	NAP	u172	0/0	3	1	0	0	insufficient_coverage
feces12	m5	NAP	u172	0/0	14	1	0	0	insufficient_coverage
feces12	m6	NAP	u172	0/0	5	1	0	0	insufficient_coverage
feces12	m7	NAP	u172	0/0	9	1	0	0	insufficient_coverage
feces12	m1	NAP	u173	65/65	64	1	1	0	dropout_allele
feces12	m2	NAP	u173	0/0	10	1	0	0	insufficient_coverage
feces12	m3	NAP	u173	63/65	29	1	1	1	NA
feces12	m4	NAP	u173	0/0	1	1	0	0	insufficient_coverage
feces12	m5	NAP	u173	0/0	7	1	0	0	insufficient_coverage
feces12	m6	NAP	u173	63/65	28	1	1	1	NA
feces12	m7	NAP	u173	0/0	13	1	0	0	insufficient_coverage
feces12	m1	NAP	u20	0/0	1	1	0	0	insufficient_coverage
feces12	m2	NAP	u20	X/X	0	0	0	NA	NA
feces12	m3	NAP	u20	X/X	0	0	0	NA	NA
feces12	m4	NAP	u20	X/X	0	0	0	NA	NA
feces12	m5	NAP	u20	X/X	0	0	0	NA	NA
feces12	m6	NAP	u20	0/0	4	1	0	0	insufficient_coverage
feces12	m7	NAP	u20	0/0	1	1	0	0	insufficient_coverage
feces12	m1	NAP	u204	0/0	1	1	0	0	insufficient_coverage
feces12	m2	NAP	u204	X/X	0	0	0	NA	NA
feces12	m3	NAP	u204	X/X	0	0	0	NA	NA
feces12	m4	NAP	u204	X/X	0	0	0	NA	NA
feces12	m5	NAP	u204	0/0	1	1	0	0	insufficient_coverage
feces12	m6	NAP	u204	X/X	0	0	0	NA	NA
feces12	m7	NAP	u204	X/X	0	0	0	NA	NA
feces12	m1	NAP	u225	0/0	4	1	0	0	insufficient_coverage
feces12	m2	NAP	u225	120/124	40	1	1	1	NA
feces12	m3	NAP	u225	X/X	0	0	0	NA	NA
feces12	m4	NAP	u225	120/124	79	1	1	1	NA
feces12	m5	NAP	u225	124/124	44	1	1	0	dropout_allele
feces12	m6	NAP	u225	120/124	22	1	1	1	NA
feces12	m7	NAP	u225	120/120	28	1	1	0	dropout_allele
feces12	m1	NAP	u250	93/93	124	1	1	0	dropout_allele
feces12	m2	NAP	u250	93/93	65	1	1	0	dropout_allele
feces12	m3	NAP	u250	93/93	72	1	1	0	dropout_allele
feces12	m4	NAP	u250	93/93	34	1	1	0	dropout_allele
feces12	m5	NAP	u250	93/93	40	1	1	0	dropout_allele
feces12	m6	NAP	u250	93/93	46	1	1	0	dropout_allele
feces12	m7	NAP	u250	91/93	68	1	1	1	NA
feces12	m1	NAP	u253	0/0	5	1	0	0	insufficient_coverage
feces12	m2	NAP	u253	0/0	10	1	0	0	insufficient_coverage
feces12	m3	NAP	u253	0/0	2	1	0	0	insufficient_coverage
feces12	m4	NAP	u253	0/0	5	1	0	0	insufficient_coverage
feces12	m5	NAP	u253	0/0	4	1	0	0	insufficient_coverage
feces12	m6	NAP	u253	X/X	0	0	0	NA	NA
feces12	m7	NAP	u253	0/0	1	1	0	0	insufficient_coverage
feces12	m1	NAP	u279	89/89	148	1	1	0	dropout_allele
feces12	m2	NAP	u279	83/85	92	1	1	0	false_allele
feces12	m3	NAP	u279	87/89	77	1	1	0	false_allele
feces12	m4	NAP	u279	83/89	43	1	1	1	NA
feces12	m5	NAP	u279	83/83	54	1	1	0	dropout_allele
feces12	m6	NAP	u279	83/89	112	1	1	1	NA
feces12	m7	NAP	u279	83/89	98	1	1	1	NA
feces12	m1	NAP	VWF	111/111	141	1	1	0	dropout_allele
feces12	m2	NAP	VWF	87/111	101	1	1	1	NA
feces12	m3	NAP	VWF	87/111	101	1	1	1	NA
feces12	m4	NAP	VWF	111/111	20	1	1	0	dropout_allele
feces12	m5	NAP	VWF	87/87	39	1	1	0	dropout_allele
feces12	m6	NAP	VWF	87/87	74	1	1	0	dropout_allele
feces12	m7	NAP	VWF	0/0	19	1	0	0	insufficient_coverage
feces2	m1	Ethanol	366	120/124	75	1	1	1	NA
feces2	m2	Ethanol	366	124/124	33	1	1	0	dropout_allele
feces2	m3	Ethanol	366	124/124	44	1	1	0	dropout_allele
feces2	m4	Ethanol	366	124/124	76	1	1	0	dropout_allele
feces2	m5	Ethanol	366	120/124	47	1	1	1	NA
feces2	m6	Ethanol	366	0/0	17	1	0	0	insufficient_coverage
feces2	m7	Ethanol	366	0/0	14	1	0	0	insufficient_coverage
feces2	m1	Ethanol	377	Unscored/Unscored	158	1	0	0	Unscored
feces2	m2	Ethanol	377	122/124	49	1	1	0	false_allele
feces2	m3	Ethanol	377	122/126	60	1	1	1	NA
feces2	m4	Ethanol	377	Unscored/Unscored	94	1	0	0	Unscored
feces2	m5	Ethanol	377	120/122	81	1	1	0	false_allele
feces2	m6	Ethanol	377	0/0	28	1	0	0	insufficient_coverage
feces2	m7	Ethanol	377	Unscored/Unscored	44	1	0	0	Unscored
feces2	m1	Ethanol	410	72/72	44	1	1	1	NA
feces2	m2	Ethanol	410	0/0	14	1	0	0	insufficient_coverage
feces2	m3	Ethanol	410	0/0	18	1	0	0	insufficient_coverage
feces2	m4	Ethanol	410	72/72	21	1	1	1	NA
feces2	m5	Ethanol	410	0/0	16	1	0	0	insufficient_coverage
feces2	m6	Ethanol	410	0/0	16	1	0	0	insufficient_coverage
feces2	m7	Ethanol	410	0/0	19	1	0	0	insufficient_coverage
feces2	m1	Ethanol	442	0/0	9	1	0	0	insufficient_coverage
feces2	m2	Ethanol	442	0/0	4	1	0	0	insufficient_coverage
feces2	m3	Ethanol	442	0/0	6	1	0	0	insufficient_coverage
feces2	m4	Ethanol	442	0/0	4	1	0	0	insufficient_coverage
feces2	m5	Ethanol	442	0/0	5	1	0	0	insufficient_coverage
feces2	m6	Ethanol	442	0/0	3	1	0	0	insufficient_coverage
feces2	m7	Ethanol	442	0/0	4	1	0	0	insufficient_coverage
feces2	m1	Ethanol	459	X/X	0	0	0	NA	NA
feces2	m2	Ethanol	459	X/X	0	0	0	NA	NA
feces2	m3	Ethanol	459	X/X	0	0	0	NA	NA
feces2	m4	Ethanol	459	X/X	0	0	0	NA	NA
feces2	m5	Ethanol	459	X/X	0	0	0	NA	NA
feces2	m6	Ethanol	459	X/X	0	0	0	NA	NA
feces2	m7	Ethanol	459	X/X	0	0	0	NA	NA
feces2	m1	Ethanol	466	113/113	27	1	1	1	NA
feces2	m2	Ethanol	466	113/113	30	1	1	1	NA
feces2	m3	Ethanol	466	0/0	16	1	0	0	insufficient_coverage
feces2	m4	Ethanol	466	113/113	30	1	1	1	NA
feces2	m5	Ethanol	466	0/0	19	1	0	0	insufficient_coverage
feces2	m6	Ethanol	466	0/0	15	1	0	0	insufficient_coverage
feces2	m7	Ethanol	466	113/113	38	1	1	1	NA
feces2	m1	Ethanol	474	X/X	0	0	0	NA	NA
feces2	m2	Ethanol	474	X/X	0	0	0	NA	NA
feces2	m3	Ethanol	474	X/X	0	0	0	NA	NA
feces2	m4	Ethanol	474	X/X	0	0	0	NA	NA
feces2	m5	Ethanol	474	X/X	0	0	0	NA	NA
feces2	m6	Ethanol	474	X/X	0	0	0	NA	NA
feces2	m7	Ethanol	474	X/X	0	0	0	NA	NA
feces2	m1	Ethanol	AHTH171	82/82	65	1	1	1	NA
feces2	m2	Ethanol	AHTH171	82/82	151	1	1	1	NA
feces2	m3	Ethanol	AHTH171	82/82	169	1	1	1	NA
feces2	m4	Ethanol	AHTH171	82/82	67	1	1	1	NA
feces2	m5	Ethanol	AHTH171	82/82	55	1	1	1	NA
feces2	m6	Ethanol	AHTH171	82/82	27	1	1	1	NA
feces2	m7	Ethanol	AHTH171	82/82	25	1	1	1	NA
feces2	m1	Ethanol	c2096	65/65	188	1	1	0	dropout_allele
feces2	m2	Ethanol	c2096	65/65	174	1	1	0	dropout_allele
feces2	m3	Ethanol	c2096	61/65	196	1	1	1	NA
feces2	m4	Ethanol	c2096	65/65	212	1	1	0	dropout_allele
feces2	m5	Ethanol	c2096	65/65	98	1	1	0	dropout_allele
feces2	m6	Ethanol	c2096	65/65	41	1	1	0	dropout_allele
feces2	m7	Ethanol	c2096	65/65	73	1	1	0	dropout_allele
feces2	m1	Ethanol	c758	0/0	3	1	0	0	insufficient_coverage
feces2	m2	Ethanol	c758	X/X	0	0	0	NA	NA
feces2	m3	Ethanol	c758	X/X	0	0	0	NA	NA
feces2	m4	Ethanol	c758	X/X	0	0	0	NA	NA
feces2	m5	Ethanol	c758	X/X	0	0	0	NA	NA
feces2	m6	Ethanol	c758	X/X	0	0	0	NA	NA
feces2	m7	Ethanol	c758	0/0	4	1	0	0	insufficient_coverage
feces2	m1	Ethanol	CPH2	56/60	57	1	1	1	NA
feces2	m2	Ethanol	CPH2	58/60	68	1	1	0	false_allele
feces2	m3	Ethanol	CPH2	60/60	62	1	1	0	dropout_allele
feces2	m4	Ethanol	CPH2	56/60	126	1	1	1	NA
feces2	m5	Ethanol	CPH2	56/60	65	1	1	1	NA
feces2	m6	Ethanol	CPH2	0/0	13	1	0	0	insufficient_coverage
feces2	m7	Ethanol	CPH2	0/0	23	1	0	0	insufficient_coverage
feces2	m1	Ethanol	CPH3	0/0	1	1	0	0	insufficient_coverage
feces2	m2	Ethanol	CPH3	0/0	1	1	0	0	insufficient_coverage
feces2	m3	Ethanol	CPH3	0/0	1	1	0	0	insufficient_coverage
feces2	m4	Ethanol	CPH3	0/0	1	1	0	0	insufficient_coverage
feces2	m5	Ethanol	CPH3	X/X	0	0	0	NA	NA
feces2	m6	Ethanol	CPH3	X/X	0	0	0	NA	NA
feces2	m7	Ethanol	CPH3	X/X	0	0	0	NA	NA
feces2	m1	Ethanol	CPH4	X/X	0	0	0	NA	NA
feces2	m2	Ethanol	CPH4	X/X	0	0	0	NA	NA
feces2	m3	Ethanol	CPH4	X/X	0	0	0	NA	NA
feces2	m4	Ethanol	CPH4	X/X	0	0	0	NA	NA
feces2	m5	Ethanol	CPH4	X/X	0	0	0	NA	NA
feces2	m6	Ethanol	CPH4	0/0	1	1	0	0	insufficient_coverage
feces2	m7	Ethanol	CPH4	X/X	0	0	0	NA	NA
feces2	m1	Ethanol	CPH5	74/78	28	1	1	1	NA
feces2	m2	Ethanol	CPH5	0/0	8	1	0	0	insufficient_coverage
feces2	m3	Ethanol	CPH5	0/0	9	1	0	0	insufficient_coverage
feces2	m4	Ethanol	CPH5	0/0	16	1	0	0	insufficient_coverage
feces2	m5	Ethanol	CPH5	0/0	9	1	0	0	insufficient_coverage
feces2	m6	Ethanol	CPH5	0/0	6	1	0	0	insufficient_coverage
feces2	m7	Ethanol	CPH5	0/0	15	1	0	0	insufficient_coverage
feces2	m1	Ethanol	CPH6	86/88	115	1	1	1	NA
feces2	m2	Ethanol	CPH6	86/88	132	1	1	1	NA
feces2	m3	Ethanol	CPH6	86/88	129	1	1	1	NA
feces2	m4	Ethanol	CPH6	86/88	62	1	1	1	NA
feces2	m5	Ethanol	CPH6	86/88	82	1	1	1	NA
feces2	m6	Ethanol	CPH6	0/0	9	1	0	0	insufficient_coverage
feces2	m7	Ethanol	CPH6	88/88	53	1	1	0	dropout_allele
feces2	m1	Ethanol	CPH7	124/128	31	1	1	1	NA
feces2	m2	Ethanol	CPH7	0/0	28	1	0	0	insufficient_coverage
feces2	m3	Ethanol	CPH7	124/128	38	1	1	1	NA
feces2	m4	Ethanol	CPH7	0/0	30	1	0	0	insufficient_coverage
feces2	m5	Ethanol	CPH7	0/0	17	1	0	0	insufficient_coverage
feces2	m6	Ethanol	CPH7	0/0	10	1	0	0	insufficient_coverage
feces2	m7	Ethanol	CPH7	122/126	41	1	1	0	false_allele
feces2	m1	Ethanol	CPH8	0/0	8	1	0	0	insufficient_coverage
feces2	m2	Ethanol	CPH8	0/0	13	1	0	0	insufficient_coverage
feces2	m3	Ethanol	CPH8	0/0	6	1	0	0	insufficient_coverage
feces2	m4	Ethanol	CPH8	0/0	8	1	0	0	insufficient_coverage
feces2	m5	Ethanol	CPH8	X/X	0	0	0	NA	NA
feces2	m6	Ethanol	CPH8	0/0	3	1	0	0	insufficient_coverage
feces2	m7	Ethanol	CPH8	0/0	3	1	0	0	insufficient_coverage
feces2	m1	Ethanol	FH2010	X/X	0	0	0	NA	NA
feces2	m2	Ethanol	FH2010	X/X	0	0	0	NA	NA
feces2	m3	Ethanol	FH2010	X/X	0	0	0	NA	NA
feces2	m4	Ethanol	FH2010	X/X	0	0	0	NA	NA
feces2	m5	Ethanol	FH2010	X/X	0	0	0	NA	NA
feces2	m6	Ethanol	FH2010	X/X	0	0	0	NA	NA
feces2	m7	Ethanol	FH2010	X/X	0	0	0	NA	NA
feces2	m1	Ethanol	FH2054	0/0	10	1	0	0	insufficient_coverage
feces2	m2	Ethanol	FH2054	0/0	4	1	0	0	insufficient_coverage
feces2	m3	Ethanol	FH2054	0/0	3	1	0	0	insufficient_coverage
feces2	m4	Ethanol	FH2054	0/0	1	1	0	0	insufficient_coverage
feces2	m5	Ethanol	FH2054	0/0	6	1	0	0	insufficient_coverage
feces2	m6	Ethanol	FH2054	0/0	4	1	0	0	insufficient_coverage
feces2	m7	Ethanol	FH2054	0/0	1	1	0	0	insufficient_coverage
feces2	m1	Ethanol	FH2109	0/0	15	1	0	0	insufficient_coverage
feces2	m2	Ethanol	FH2109	0/0	9	1	0	0	insufficient_coverage
feces2	m3	Ethanol	FH2109	0/0	12	1	0	0	insufficient_coverage
feces2	m4	Ethanol	FH2109	X/X	0	0	0	NA	NA
feces2	m5	Ethanol	FH2109	0/0	5	1	0	0	insufficient_coverage
feces2	m6	Ethanol	FH2109	0/0	2	1	0	0	insufficient_coverage
feces2	m7	Ethanol	FH2109	0/0	11	1	0	0	insufficient_coverage
feces2	m1	Ethanol	Ren49F22	0/0	3	1	0	0	insufficient_coverage
feces2	m2	Ethanol	Ren49F22	0/0	2	1	0	0	insufficient_coverage
feces2	m3	Ethanol	Ren49F22	0/0	1	1	0	0	insufficient_coverage
feces2	m4	Ethanol	Ren49F22	X/X	0	0	0	NA	NA
feces2	m5	Ethanol	Ren49F22	0/0	1	1	0	0	insufficient_coverage
feces2	m6	Ethanol	Ren49F22	0/0	1	1	0	0	insufficient_coverage
feces2	m7	Ethanol	Ren49F22	X/X	0	0	0	NA	NA
feces2	m1	Ethanol	u109	0/0	12	1	0	0	insufficient_coverage
feces2	m2	Ethanol	u109	0/0	14	1	0	0	insufficient_coverage
feces2	m3	Ethanol	u109	0/0	8	1	0	0	insufficient_coverage
feces2	m4	Ethanol	u109	0/0	6	1	0	0	insufficient_coverage
feces2	m5	Ethanol	u109	0/0	9	1	0	0	insufficient_coverage
feces2	m6	Ethanol	u109	0/0	12	1	0	0	insufficient_coverage
feces2	m7	Ethanol	u109	0/0	13	1	0	0	insufficient_coverage
feces2	m1	Ethanol	u140	89/101	385	1	1	1	NA
feces2	m2	Ethanol	u140	89/101	265	1	1	1	NA
feces2	m3	Ethanol	u140	89/101	229	1	1	1	NA
feces2	m4	Ethanol	u140	89/101	262	1	1	1	NA
feces2	m5	Ethanol	u140	89/101	282	1	1	1	NA
feces2	m6	Ethanol	u140	89/101	128	1	1	1	NA
feces2	m7	Ethanol	u140	89/101	226	1	1	1	NA
feces2	m1	Ethanol	u172	114/114	69	1	1	1	NA
feces2	m2	Ethanol	u172	0/0	22	1	0	0	insufficient_coverage
feces2	m3	Ethanol	u172	114/114	59	1	1	1	NA
feces2	m4	Ethanol	u172	114/114	56	1	1	1	NA
feces2	m5	Ethanol	u172	114/114	76	1	1	1	NA
feces2	m6	Ethanol	u172	0/0	14	1	0	0	insufficient_coverage
feces2	m7	Ethanol	u172	0/0	17	1	0	0	insufficient_coverage
feces2	m1	Ethanol	u173	65/67	56	1	1	1	NA
feces2	m2	Ethanol	u173	67/67	59	1	1	0	dropout_allele
feces2	m3	Ethanol	u173	65/67	68	1	1	1	NA
feces2	m4	Ethanol	u173	65/67	38	1	1	1	NA
feces2	m5	Ethanol	u173	67/67	29	1	1	0	dropout_allele
feces2	m6	Ethanol	u173	0/0	14	1	0	0	insufficient_coverage
feces2	m7	Ethanol	u173	65/67	36	1	1	1	NA
feces2	m1	Ethanol	u20	0/0	1	1	0	0	insufficient_coverage
feces2	m2	Ethanol	u20	X/X	0	0	0	NA	NA
feces2	m3	Ethanol	u20	0/0	2	1	0	0	insufficient_coverage
feces2	m4	Ethanol	u20	0/0	1	1	0	0	insufficient_coverage
feces2	m5	Ethanol	u20	0/0	3	1	0	0	insufficient_coverage
feces2	m6	Ethanol	u20	X/X	0	0	0	NA	NA
feces2	m7	Ethanol	u20	0/0	5	1	0	0	insufficient_coverage
feces2	m1	Ethanol	u204	168/168	28	1	1	1	NA
feces2	m2	Ethanol	u204	168/168	54	1	1	1	NA
feces2	m3	Ethanol	u204	168/168	43	1	1	1	NA
feces2	m4	Ethanol	u204	168/168	28	1	1	1	NA
feces2	m5	Ethanol	u204	168/168	43	1	1	1	NA
feces2	m6	Ethanol	u204	168/168	24	1	1	1	NA
feces2	m7	Ethanol	u204	168/168	26	1	1	1	NA
feces2	m1	Ethanol	u225	124/124	270	1	1	1	NA
feces2	m2	Ethanol	u225	124/124	92	1	1	1	NA
feces2	m3	Ethanol	u225	124/124	419	1	1	1	NA
feces2	m4	Ethanol	u225	124/124	190	1	1	1	NA
feces2	m5	Ethanol	u225	124/124	288	1	1	1	NA
feces2	m6	Ethanol	u225	124/124	122	1	1	1	NA
feces2	m7	Ethanol	u225	124/124	219	1	1	1	NA
feces2	m1	Ethanol	u250	93/93	172	1	1	0	dropout_allele
feces2	m2	Ethanol	u250	93/103	239	1	1	1	NA
feces2	m3	Ethanol	u250	93/103	254	1	1	1	NA
feces2	m4	Ethanol	u250	Unscored/Unscored	229	1	0	0	Unscored
feces2	m5	Ethanol	u250	93/101	184	1	1	0	false_allele
feces2	m6	Ethanol	u250	91/103	55	1	1	0	false_allele
feces2	m7	Ethanol	u250	91/93	171	1	1	0	false_allele
feces2	m1	Ethanol	u253	0/0	26	1	0	0	insufficient_coverage
feces2	m2	Ethanol	u253	0/0	11	1	0	0	insufficient_coverage
feces2	m3	Ethanol	u253	0/0	11	1	0	0	insufficient_coverage
[truncated: 3,378 more rows]

## Sheet: Table S4.reference
Table S4. Reference genotypes. Most likely genotype based on the consensus of all 14 replicates across the two treatments (see Methods for criteria). (total number of possible genotypes: 12 feces * 32 loci = 384)
Sample#	Field#	366	377	410	442	459	466	474	AHTH171	c2096	c758	CPH2	CPH3	CPH4	CPH5	CPH6	CPH7	CPH8	FH2010	FH2054	FH2109	Ren49F22	u109	u140	u172	u173	u20	u204	u225	u250	u253	u279	VWF
Feces1	20200628-1-AFG	-	amb.	-	-	amb.	-	-	-	-	-	amb.	-	-	-	-	-	-	-	-	-	-	-	-	-	-	-	-	amb.	amb.	-	-	amb.
Feces2	20200628-2-AFG	120/124	122/126	72/72	-	-	113/113	-	82/82	61/65	-	56/60	-	-	74/78	86/88	124/128	-	-	-	amb.	-	amb.	89/101	114/114	65/67	-	168/168	124/124	93/103	60/64	89/91	105/111
Feces3	20200704-1-AFG	-	104/128	78/80	-	-	-	-	84/84	61/65	-	54/64	-	-	78/78	-	amb.	-	-	-	-	-	-	95/99	114/114	61/63	-	-	120/120	99/101	68/68	87/89	105/117
Feces4	20200704-2-AFG	amb.	126/128	amb.	-	118/120	-	-	amb.	65/65	-	54/54	-	-	-	-	122/124	-	-	-	-	-	amb.	95/99	114/114	61/63	-	174/174	120/124	97/99	-	81/87	105/117
Feces5	20200704-3-AFG	-	104/124	80/82	amb.	116/118	-	68/68	84/96	61/65	-	56/64	-	-	78/78	90/90	122/124	amb.	-	-	-	-	100/100	99/99	114/114	63/75	-	amb.	120/120	97/103	62/68	79/81	135/141
Feces6	20200704-4-AFG	amb.	amb.	-	amb.	amb.	-	-	amb.	amb.	-	amb.	-	-	-	amb.	amb.	-	-	-	-	-	amb.	amb.	114/114	amb.	-	amb.	120/120	91/93	-	amb.	111/111
Feces7	20200704-5-AFG	120/136	124/126	72/76	amb.	-	105/105	-	82/88	61/61	-	56/60	-	-	-	86/88	126/128	amb.	-	amb.	132/140	-	100/104	89/99	114/114	65/67	-	160/164	120/120	93/93	60/64	83/83	111/111
Feces8	20200705-1-AFG	124/136	120/122	56/72	119/123	-	113/113	68/68	92/92	57/57	-	56/60	-	-	88/88	82/82	126/128	162/162	-	111/111	amb.	-	100/100	89/95	114/114	65/65	-	160/162	120/120	93/93	64/64	83/89	87/105
Feces9	20200705-2-AFG	124/136	122/124	56/56	123/123	-	105/113	68/68	88/92	57/61	-	56/58	-	-	88/88	82/86	126/128	162/164	-	-	132/132	-	104/104	95/99	114/114	63/67	-	162/164	120/124	93/93	60/62	87/89	105/105
Feces10	20200705-3-AFG	120/136	122/126	56/56	119/123	-	113/113	68/68	82/88	61/61	181/187	60/60	127/127	-	78/78	86/88	126/128	162/162	-	111/111	128/128	-	100/104	99/99	114/114	63/65	-	162/162	120/120	91/93	60/62	87/97	87/111
Feces11	20200705-4-AFG	amb.	amb.	amb.	-	-	-	amb.	-	61/61	-	amb.	-	-	-	amb.	amb.	amb.	-	-	-	-	-	99/99	amb.	amb.	-	-	120/124	93/93	60/64	83/83	87/105
Feces12	20200706-1-AFG	136/136	122/126	72/78	amb.	-	113/113	-	amb.	57/61	-	56/60	-	-	amb.	82/86	amb.	amb.	-	-	-	-	100/104	89/89	114/114	63/65	-	162/162	120/124	91/93	64/64	83/89	87/111
75		Homozygotes		184	total genotypes
109		Heterozygotes
48	amb.	Ambiguous
144	-	No data

## Sheet: Table S5.reads
Table S5. Number of raw reads. Per sample and PCR replicate in both preservation methods.
FIELD ID	LAB ID	EXT ID	PCR replicate	strand	Method	Number of raw reads
20200704-3-AFG	JAL9092	TFE1	m1	R1	Ethanol	21976
20200704-3-AFG	JAL9092	TFE1	m1	R2	Ethanol	21976
20200704-3-AFG	JAL9092	TFE1	m2	R1	Ethanol	32141
20200704-3-AFG	JAL9092	TFE1	m2	R2	Ethanol	32141
20200704-3-AFG	JAL9092	TFE1	m3	R1	Ethanol	122143
20200704-3-AFG	JAL9092	TFE1	m3	R2	Ethanol	122143
20200704-3-AFG	JAL9092	TFE1	m4	R1	Ethanol	9
20200704-3-AFG	JAL9092	TFE1	m4	R2	Ethanol	9
20200704-3-AFG	JAL9092	TFE1	m5	R1	Ethanol	8
20200704-3-AFG	JAL9092	TFE1	m5	R2	Ethanol	8
20200704-3-AFG	JAL9092	TFE1	m6	R1	Ethanol	10
20200704-3-AFG	JAL9092	TFE1	m6	R2	Ethanol	10
20200704-3-AFG	JAL9092	TFE1	m7	R1	Ethanol	61
20200704-3-AFG	JAL9092	TFE1	m7	R2	Ethanol	61
20200704-4-AFG	JAL9096	TFE2	m1	R1	Ethanol	33539
20200704-4-AFG	JAL9096	TFE2	m1	R2	Ethanol	33539
20200704-4-AFG	JAL9096	TFE2	m2	R1	Ethanol	14165
20200704-4-AFG	JAL9096	TFE2	m2	R2	Ethanol	14165
20200704-4-AFG	JAL9096	TFE2	m3	R1	Ethanol	9210
20200704-4-AFG	JAL9096	TFE2	m3	R2	Ethanol	9210
20200704-4-AFG	JAL9096	TFE2	m4	R1	Ethanol	7
20200704-4-AFG	JAL9096	TFE2	m4	R2	Ethanol	7
20200704-4-AFG	JAL9096	TFE2	m5	R1	Ethanol	15
20200704-4-AFG	JAL9096	TFE2	m5	R2	Ethanol	15
20200704-4-AFG	JAL9096	TFE2	m6	R1	Ethanol	22
20200704-4-AFG	JAL9096	TFE2	m6	R2	Ethanol	22
20200704-4-AFG	JAL9096	TFE2	m7	R1	Ethanol	8389
20200704-4-AFG	JAL9096	TFE2	m7	R2	Ethanol	8389
20200705-3-AFG	JAL9097	TFE3	m1	R1	Ethanol	54667
20200705-3-AFG	JAL9097	TFE3	m1	R2	Ethanol	54667
20200705-3-AFG	JAL9097	TFE3	m2	R1	Ethanol	163095
20200705-3-AFG	JAL9097	TFE3	m2	R2	Ethanol	163095
20200705-3-AFG	JAL9097	TFE3	m3	R1	Ethanol	157399
20200705-3-AFG	JAL9097	TFE3	m3	R2	Ethanol	157399
20200705-3-AFG	JAL9097	TFE3	m4	R1	Ethanol	0
20200705-3-AFG	JAL9097	TFE3	m4	R2	Ethanol	0
20200705-3-AFG	JAL9097	TFE3	m5	R1	Ethanol	0
20200705-3-AFG	JAL9097	TFE3	m5	R1	Ethanol	0
20200705-3-AFG	JAL9097	TFE3	m6	R1	Ethanol	1
20200705-3-AFG	JAL9097	TFE3	m6	R2	Ethanol	1
20200705-3-AFG	JAL9097	TFE3	m7	R1	Ethanol	129713
20200705-3-AFG	JAL9097	TFE3	m7	R2	Ethanol	129713
20200705-2-AFG	JAL9098	TFE4	m1	R1	Ethanol	34713
20200705-2-AFG	JAL9098	TFE4	m1	R2	Ethanol	34713
20200705-2-AFG	JAL9098	TFE4	m2	R1	Ethanol	79857
20200705-2-AFG	JAL9098	TFE4	m2	R2	Ethanol	79857
20200705-2-AFG	JAL9098	TFE4	m3	R1	Ethanol	71930
20200705-2-AFG	JAL9098	TFE4	m3	R2	Ethanol	71930
20200705-2-AFG	JAL9098	TFE4	m4	R1	Ethanol	1
20200705-2-AFG	JAL9098	TFE4	m4	R2	Ethanol	1
20200705-2-AFG	JAL9098	TFE4	m5	R1	Ethanol	0
20200705-2-AFG	JAL9098	TFE4	m5	R2	Ethanol	0
20200705-2-AFG	JAL9098	TFE4	m6	R1	Ethanol	1
20200705-2-AFG	JAL9098	TFE4	m6	R2	Ethanol	1
20200705-2-AFG	JAL9098	TFE4	m7	R1	Ethanol	128711
20200705-2-AFG	JAL9098	TFE4	m7	R2	Ethanol	128711
20200705-4-AFG	JAL9099	TFE5	m1	R1	Ethanol	41457
20200705-4-AFG	JAL9099	TFE5	m1	R2	Ethanol	41457
20200705-4-AFG	JAL9099	TFE5	m2	R1	Ethanol	26270
20200705-4-AFG	JAL9099	TFE5	m2	R2	Ethanol	26270
20200705-4-AFG	JAL9099	TFE5	m3	R1	Ethanol	22231
20200705-4-AFG	JAL9099	TFE5	m3	R2	Ethanol	22231
20200705-4-AFG	JAL9099	TFE5	m4	R1	Ethanol	11747
20200705-4-AFG	JAL9099	TFE5	m4	R2	Ethanol	11747
20200705-4-AFG	JAL9099	TFE5	m5	R1	Ethanol	10720
20200705-4-AFG	JAL9099	TFE5	m5	R2	Ethanol	10720
20200705-4-AFG	JAL9099	TFE5	m6	R1	Ethanol	15582
20200705-4-AFG	JAL9099	TFE5	m6	R2	Ethanol	15582
20200705-4-AFG	JAL9099	TFE5	m7	R1	Ethanol	108560
20200705-4-AFG	JAL9099	TFE5	m7	R2	Ethanol	108560
20200704-5-AFG	JAL9100	TFE6	m1	R1	Ethanol	48208
20200704-5-AFG	JAL9100	TFE6	m1	R2	Ethanol	48208
20200704-5-AFG	JAL9100	TFE6	m2	R1	Ethanol	29121
20200704-5-AFG	JAL9100	TFE6	m2	R2	Ethanol	29121
20200704-5-AFG	JAL9100	TFE6	m3	R1	Ethanol	38602
20200704-5-AFG	JAL9100	TFE6	m3	R2	Ethanol	38602
20200704-5-AFG	JAL9100	TFE6	m4	R1	Ethanol	14638
20200704-5-AFG	JAL9100	TFE6	m4	R2	Ethanol	14638
20200704-5-AFG	JAL9100	TFE6	m5	R1	Ethanol	1062
20200704-5-AFG	JAL9100	TFE6	m5	R2	Ethanol	1062
20200704-5-AFG	JAL9100	TFE6	m6	R1	Ethanol	17525
20200704-5-AFG	JAL9100	TFE6	m6	R2	Ethanol	17525
20200704-5-AFG	JAL9100	TFE6	m7	R1	Ethanol	29535
20200704-5-AFG	JAL9100	TFE6	m7	R2	Ethanol	29535
20200706-1-AFG	JAL9101	TFE7	m1	R1	Ethanol	28310
20200706-1-AFG	JAL9101	TFE7	m1	R2	Ethanol	28310
20200706-1-AFG	JAL9101	TFE7	m2	R1	Ethanol	34906
20200706-1-AFG	JAL9101	TFE7	m2	R2	Ethanol	34906
20200706-1-AFG	JAL9101	TFE7	m3	R1	Ethanol	25987
20200706-1-AFG	JAL9101	TFE7	m3	R2	Ethanol	25987
20200706-1-AFG	JAL9101	TFE7	m4	R1	Ethanol	40641
20200706-1-AFG	JAL9101	TFE7	m4	R2	Ethanol	40641
20200706-1-AFG	JAL9101	TFE7	m5	R1	Ethanol	2595
20200706-1-AFG	JAL9101	TFE7	m5	R2	Ethanol	2595
20200706-1-AFG	JAL9101	TFE7	m6	R1	Ethanol	24324
20200706-1-AFG	JAL9101	TFE7	m6	R2	Ethanol	24324
20200706-1-AFG	JAL9101	TFE7	m7	R1	Ethanol	18480
20200706-1-AFG	JAL9101	TFE7	m7	R2	Ethanol	18480
20200705-1-AFG	JAL9101	TFE8	m1	R1	Ethanol	72205
20200705-1-AFG	JAL9101	TFE8	m1	R2	Ethanol	72205
20200705-1-AFG	JAL9101	TFE8	m2	R1	Ethanol	68831
20200705-1-AFG	JAL9101	TFE8	m2	R2	Ethanol	68831
20200705-1-AFG	JAL9101	TFE8	m3	R1	Ethanol	51390
20200705-1-AFG	JAL9101	TFE8	m3	R2	Ethanol	51390
20200705-1-AFG	JAL9101	TFE8	m4	R1	Ethanol	43337
20200705-1-AFG	JAL9101	TFE8	m4	R2	Ethanol	43337
20200705-1-AFG	JAL9101	TFE8	m5	R1	Ethanol	4585
20200705-1-AFG	JAL9101	TFE8	m5	R2	Ethanol	4585
20200705-1-AFG	JAL9101	TFE8	m6	R1	Ethanol	37079
20200705-1-AFG	JAL9101	TFE8	m6	R2	Ethanol	37079
20200705-1-AFG	JAL9101	TFE8	m7	R1	Ethanol	41470
20200705-1-AFG	JAL9101	TFE8	m7	R2	Ethanol	41470
20200628-2-AFG	JAL9103	TFE9	m1	R1	Ethanol	26080
20200628-2-AFG	JAL9103	TFE9	m1	R2	Ethanol	26080
20200628-2-AFG	JAL9103	TFE9	m2	R1	Ethanol	25633
20200628-2-AFG	JAL9103	TFE9	m2	R2	Ethanol	25633
20200628-2-AFG	JAL9103	TFE9	m3	R1	Ethanol	26375
20200628-2-AFG	JAL9103	TFE9	m3	R2	Ethanol	26375
20200628-2-AFG	JAL9103	TFE9	m4	R1	Ethanol	23226
20200628-2-AFG	JAL9103	TFE9	m4	R2	Ethanol	23226
20200628-2-AFG	JAL9103	TFE9	m5	R1	Ethanol	25991
20200628-2-AFG	JAL9103	TFE9	m5	R2	Ethanol	25991
20200628-2-AFG	JAL9103	TFE9	m6	R1	Ethanol	13353
20200628-2-AFG	JAL9103	TFE9	m6	R2	Ethanol	13353
20200628-2-AFG	JAL9103	TFE9	m7	R1	Ethanol	19209
20200628-2-AFG	JAL9103	TFE9	m7	R2	Ethanol	19209
20200704-2-AFG	JAL9093	TFE10	m1	R1	Ethanol	33011
20200704-2-AFG	JAL9093	TFE10	m1	R2	Ethanol	33011
20200704-2-AFG	JAL9093	TFE10	m2	R1	Ethanol	21754
20200704-2-AFG	JAL9093	TFE10	m2	R2	Ethanol	21754
20200704-2-AFG	JAL9093	TFE10	m3	R1	Ethanol	22488
20200704-2-AFG	JAL9093	TFE10	m3	R2	Ethanol	22488
20200704-2-AFG	JAL9093	TFE10	m4	R1	Ethanol	16560
20200704-2-AFG	JAL9093	TFE10	m4	R2	Ethanol	16560
20200704-2-AFG	JAL9093	TFE10	m5	R1	Ethanol	21732
20200704-2-AFG	JAL9093	TFE10	m5	R2	Ethanol	21732
20200704-2-AFG	JAL9093	TFE10	m6	R1	Ethanol	13000
20200704-2-AFG	JAL9093	TFE10	m6	R2	Ethanol	13000
20200704-2-AFG	JAL9093	TFE10	m7	R1	Ethanol	145
20200704-2-AFG	JAL9093	TFE10	m7	R2	Ethanol	145
20200704-1-AFG	JAL9094	TFE11	m1	R1	Ethanol	36129
20200704-1-AFG	JAL9094	TFE11	m1	R2	Ethanol	36129
20200704-1-AFG	JAL9094	TFE11	m2	R1	Ethanol	16973
20200704-1-AFG	JAL9094	TFE11	m2	R2	Ethanol	16973
20200704-1-AFG	JAL9094	TFE11	m3	R1	Ethanol	22390
20200704-1-AFG	JAL9094	TFE11	m3	R2	Ethanol	22390
20200704-1-AFG	JAL9094	TFE11	m4	R1	Ethanol	21274
20200704-1-AFG	JAL9094	TFE11	m4	R2	Ethanol	21274
20200704-1-AFG	JAL9094	TFE11	m5	R1	Ethanol	11044
20200704-1-AFG	JAL9094	TFE11	m5	R2	Ethanol	11044
20200704-1-AFG	JAL9094	TFE11	m6	R1	Ethanol	14115
20200704-1-AFG	JAL9094	TFE11	m6	R2	Ethanol	14115
20200704-1-AFG	JAL9094	TFE11	m7	R1	Ethanol	123
20200704-1-AFG	JAL9094	TFE11	m7	R2	Ethanol	123
20200628-1-AFG	JAL9094	TFE12	m1	R1	Ethanol	25618
20200628-1-AFG	JAL9095	TFE12	m1	R2	Ethanol	25618
20200628-1-AFG	JAL9095	TFE12	m2	R1	Ethanol	25880
20200628-1-AFG	JAL9095	TFE12	m2	R2	Ethanol	25880
20200628-1-AFG	JAL9095	TFE12	m3	R1	Ethanol	27249
20200628-1-AFG	JAL9095	TFE12	m3	R2	Ethanol	27249
20200628-1-AFG	JAL9095	TFE12	m4	R1	Ethanol	15677
20200628-1-AFG	JAL9095	TFE12	m4	R2	Ethanol	15677
20200628-1-AFG	JAL9095	TFE12	m5	R1	Ethanol	13725
20200628-1-AFG	JAL9095	TFE12	m5	R2	Ethanol	13725
20200628-1-AFG	JAL9095	TFE12	m6	R1	Ethanol	42
20200628-1-AFG	JAL9095	TFE12	m6	R2	Ethanol	42
20200628-1-AFG	JAL9095	TFE12	m7	R1	Ethanol	3919
20200628-1-AFG	JAL9095	TFE12	m7	R2	Ethanol	3919
20200704-3-AFG	JAL9092	TFE14	m1	R1	NAP	24761
20200704-3-AFG	JAL9092	TFE14	m1	R2	NAP	24761
20200704-3-AFG	JAL9092	TFE14	m2	R1	NAP	60741
20200704-3-AFG	JAL9092	TFE14	m2	R2	NAP	60741
20200704-3-AFG	JAL9092	TFE14	m3	R1	NAP	90558
20200704-3-AFG	JAL9092	TFE14	m3	R2	NAP	90558
20200704-3-AFG	JAL9092	TFE14	m4	R1	NAP	4
20200704-3-AFG	JAL9092	TFE14	m4	R2	NAP	4
20200704-3-AFG	JAL9092	TFE14	m5	R1	NAP	2
20200704-3-AFG	JAL9092	TFE14	m5	R2	NAP	2
20200704-3-AFG	JAL9092	TFE14	m6	R1	NAP	2
20200704-3-AFG	JAL9092	TFE14	m6	R2	NAP	2
20200704-3-AFG	JAL9092	TFE14	m7	R1	NAP	16639
20200704-3-AFG	JAL9092	TFE14	m7	R2	NAP	16639
20200704-4-AFG	JAL9096	TFE15	m1	R1	NAP	7865
20200704-4-AFG	JAL9096	TFE15	m1	R2	NAP	7865
20200704-4-AFG	JAL9096	TFE15	m2	R1	NAP	6662
20200704-4-AFG	JAL9096	TFE15	m2	R2	NAP	6662
20200704-4-AFG	JAL9096	TFE15	m3	R1	NAP	9510
20200704-4-AFG	JAL9096	TFE15	m3	R2	NAP	9510
20200704-4-AFG	JAL9096	TFE15	m4	R1	NAP	19
20200704-4-AFG	JAL9096	TFE15	m4	R2	NAP	19
20200704-4-AFG	JAL9096	TFE15	m5	R1	NAP	8
20200704-4-AFG	JAL9096	TFE15	m5	R2	NAP	8
20200704-4-AFG	JAL9096	TFE15	m6	R1	NAP	10
20200704-4-AFG	JAL9096	TFE15	m6	R2	NAP	10
20200704-4-AFG	JAL9096	TFE15	m7	R1	NAP	2359
20200704-4-AFG	JAL9096	TFE15	m7	R2	NAP	2359
20200705-3-AFG	JAL9097	TFE16	m1	R1	NAP	44957
20200705-3-AFG	JAL9097	TFE16	m1	R2	NAP	44957
20200705-3-AFG	JAL9097	TFE16	m2	R1	NAP	22804
20200705-3-AFG	JAL9097	TFE16	m2	R2	NAP	22804
20200705-3-AFG	JAL9097	TFE16	m3	R1	NAP	38797
20200705-3-AFG	JAL9097	TFE16	m3	R2	NAP	38797
20200705-3-AFG	JAL9097	TFE16	m4	R1	NAP	0
20200705-3-AFG	JAL9097	TFE16	m4	R2	NAP	0
20200705-3-AFG	JAL9097	TFE16	m5	R1	NAP	0
20200705-3-AFG	JAL9097	TFE16	m5	R2	NAP	0
20200705-3-AFG	JAL9097	TFE16	m6	R1	NAP	0
20200705-3-AFG	JAL9097	TFE16	m6	R2	NAP	0
20200705-3-AFG	JAL9097	TFE16	m7	R1	NAP	8726
20200705-3-AFG	JAL9097	TFE16	m7	R2	NAP	8726
20200705-2-AFG	JAL9098	TFE17	m1	R1	NAP	31648
20200705-2-AFG	JAL9098	TFE17	m1	R2	NAP	31648
20200705-2-AFG	JAL9098	TFE17	m2	R1	NAP	75277
20200705-2-AFG	JAL9098	TFE17	m2	R2	NAP	75277
20200705-2-AFG	JAL9098	TFE17	m3	R1	NAP	80285
20200705-2-AFG	JAL9098	TFE17	m3	R2	NAP	80285
20200705-2-AFG	JAL9098	TFE17	m4	R1	NAP	0
20200705-2-AFG	JAL9098	TFE17	m4	R2	NAP	0
20200705-2-AFG	JAL9098	TFE17	m5	R1	NAP	0
20200705-2-AFG	JAL9098	TFE17	m5	R2	NAP	0
20200705-2-AFG	JAL9098	TFE17	m6	R1	NAP	0
20200705-2-AFG	JAL9098	TFE17	m6	R2	NAP	0
20200705-2-AFG	JAL9098	TFE17	m7	R1	NAP	136632
20200705-2-AFG	JAL9098	TFE17	m7	R2	NAP	136632
20200705-4-AFG	JAL9099	TFE18	m1	R1	NAP	29831
20200705-4-AFG	JAL9099	TFE18	m1	R2	NAP	29831
20200705-4-AFG	JAL9099	TFE18	m2	R1	NAP	27098
20200705-4-AFG	JAL9099	TFE18	m2	R2	NAP	27098
20200705-4-AFG	JAL9099	TFE18	m3	R1	NAP	27320
20200705-4-AFG	JAL9099	TFE18	m3	R2	NAP	27320
20200705-4-AFG	JAL9099	TFE18	m4	R1	NAP	19055
20200705-4-AFG	JAL9099	TFE18	m4	R2	NAP	19055
20200705-4-AFG	JAL9099	TFE18	m5	R1	NAP	19466
20200705-4-AFG	JAL9099	TFE18	m5	R2	NAP	19466
20200705-4-AFG	JAL9099	TFE18	m6	R1	NAP	11169
20200705-4-AFG	JAL9099	TFE18	m6	R2	NAP	11169
20200705-4-AFG	JAL9099	TFE18	m7	R1	NAP	67777
20200705-4-AFG	JAL9099	TFE18	m7	R2	NAP	67777
20200704-5-AFG	JAL9100	TFE19	m1	R1	NAP	48103
20200704-5-AFG	JAL9100	TFE19	m1	R2	NAP	48103
20200704-5-AFG	JAL9100	TFE19	m2	R1	NAP	26522
20200704-5-AFG	JAL9100	TFE19	m2	R2	NAP	26522
20200704-5-AFG	JAL9100	TFE19	m3	R1	NAP	46829
20200704-5-AFG	JAL9100	TFE19	m3	R2	NAP	46829
20200704-5-AFG	JAL9100	TFE19	m4	R1	NAP	25691
20200704-5-AFG	JAL9100	TFE19	m4	R2	NAP	25691
20200704-5-AFG	JAL9100	TFE19	m5	R1	NAP	22232
20200704-5-AFG	JAL9100	TFE19	m5	R2	NAP	22232
20200704-5-AFG	JAL9100	TFE19	m6	R1	NAP	13356
20200704-5-AFG	JAL9100	TFE19	m6	R2	NAP	13356
20200704-5-AFG	JAL9100	TFE19	m7	R1	NAP	56454
20200704-5-AFG	JAL9100	TFE19	m7	R2	NAP	56454
20200706-1-AFG	JAL9101	TFE20	m1	R1	NAP	60968
20200706-1-AFG	JAL9101	TFE20	m1	R2	NAP	60968
20200706-1-AFG	JAL9101	TFE20	m2	R1	NAP	28682
20200706-1-AFG	JAL9101	TFE20	m2	R2	NAP	28682
20200706-1-AFG	JAL9101	TFE20	m3	R1	NAP	22649
20200706-1-AFG	JAL9101	TFE20	m3	R2	NAP	22649
20200706-1-AFG	JAL9101	TFE20	m4	R1	NAP	28568
20200706-1-AFG	JAL9101	TFE20	m4	R2	NAP	28568
20200706-1-AFG	JAL9101	TFE20	m5	R1	NAP	16747
20200706-1-AFG	JAL9101	TFE20	m5	R2	NAP	16747
20200706-1-AFG	JAL9101	TFE20	m6	R1	NAP	25210
20200706-1-AFG	JAL9101	TFE20	m6	R2	NAP	25210
20200706-1-AFG	JAL9101	TFE20	m7	R1	NAP	23482
20200706-1-AFG	JAL9101	TFE20	m7	R2	NAP	23482
20200705-1-AFG	JAL9101	TFE21	m1	R1	NAP	32445
20200705-1-AFG	JAL9101	TFE21	m1	R2	NAP	32445
20200705-1-AFG	JAL9101	TFE21	m2	R1	NAP	37950
20200705-1-AFG	JAL9101	TFE21	m2	R2	NAP	37950
20200705-1-AFG	JAL9101	TFE21	m3	R1	NAP	36071
20200705-1-AFG	JAL9101	TFE21	m3	R2	NAP	36071
20200705-1-AFG	JAL9101	TFE21	m4	R1	NAP	28772
20200705-1-AFG	JAL9101	TFE21	m4	R2	NAP	28772
20200705-1-AFG	JAL9101	TFE21	m5	R1	NAP	26396
20200705-1-AFG	JAL9101	TFE21	m5	R2	NAP	26396
20200705-1-AFG	JAL9101	TFE21	m6	R1	NAP	23517
20200705-1-AFG	JAL9101	TFE21	m6	R2	NAP	23517
20200705-1-AFG	JAL9101	TFE21	m7	R1	NAP	46868
20200705-1-AFG	JAL9101	TFE21	m7	R2	NAP	46868
20200628-2-AFG	JAL9103	TFE22	m1	R1	NAP	26432
20200628-2-AFG	JAL9103	TFE22	m1	R2	NAP	26432
20200628-2-AFG	JAL9103	TFE22	m2	R1	NAP	29098
20200628-2-AFG	JAL9103	TFE22	m2	R2	NAP	29098
20200628-2-AFG	JAL9103	TFE22	m3	R1	NAP	33550
20200628-2-AFG	JAL9103	TFE22	m3	R2	NAP	33550
20200628-2-AFG	JAL9103	TFE22	m4	R1	NAP	16998
20200628-2-AFG	JAL9103	TFE22	m4	R2	NAP	16998
20200628-2-AFG	JAL9103	TFE22	m5	R1	NAP	20162
20200628-2-AFG	JAL9103	TFE22	m5	R2	NAP	20162
20200628-2-AFG	JAL9103	TFE22	m6	R1	NAP	22855
20200628-2-AFG	JAL9103	TFE22	m6	R2	NAP	22855
20200628-2-AFG	JAL9103	TFE22	m7	R1	NAP	4242
20200628-2-AFG	JAL9103	TFE22	m7	R2	NAP	4242
20200704-2-AFG	JAL9093	TFE23	m1	R1	NAP	21948
20200704-2-AFG	JAL9093	TFE23	m1	R2	NAP	21948
20200704-2-AFG	JAL9093	TFE23	m2	R1	NAP	25580
20200704-2-AFG	JAL9093	TFE23	m2	R2	NAP	25580
20200704-2-AFG	JAL9093	TFE23	m3	R1	NAP	16026
20200704-2-AFG	JAL9093	TFE23	m3	R2	NAP	16026
20200704-2-AFG	JAL9093	TFE23	m4	R1	NAP	14345
20200704-2-AFG	JAL9093	TFE23	m4	R2	NAP	14345
20200704-2-AFG	JAL9093	TFE23	m5	R1	NAP	17279
20200704-2-AFG	JAL9093	TFE23	m5	R2	NAP	17279
20200704-2-AFG	JAL9093	TFE23	m6	R1	NAP	13561
20200704-2-AFG	JAL9093	TFE23	m6	R2	NAP	13561
20200704-2-AFG	JAL9093	TFE23	m7	R1	NAP	25939
20200704-2-AFG	JAL9093	TFE23	m7	R2	NAP	25939
20200704-1-AFG	JAL9094	TFE24	m1	R1	NAP	20649
20200704-1-AFG	JAL9094	TFE24	m1	R2	NAP	20649
20200704-1-AFG	JAL9094	TFE24	m2	R1	NAP	19273
20200704-1-AFG	JAL9094	TFE24	m2	R2	NAP	19273
20200704-1-AFG	JAL9094	TFE24	m3	R1	NAP	20187
20200704-1-AFG	JAL9094	TFE24	m3	R2	NAP	20187
20200704-1-AFG	JAL9094	TFE24	m4	R1	NAP	16988
20200704-1-AFG	JAL9094	TFE24	m4	R2	NAP	16988
20200704-1-AFG	JAL9094	TFE24	m5	R1	NAP	16515
20200704-1-AFG	JAL9094	TFE24	m5	R2	NAP	16515
20200704-1-AFG	JAL9094	TFE24	m6	R1	NAP	11573
20200704-1-AFG	JAL9094	TFE24	m6	R2	NAP	11573
20200704-1-AFG	JAL9094	TFE24	m7	R1	NAP	19372
20200704-1-AFG	JAL9094	TFE24	m7	R2	NAP	19372
20200628-1-AFG	JAL9095	TFE25	m1	R1	NAP	6267
20200628-1-AFG	JAL9095	TFE25	m1	R2	NAP	6267
20200628-1-AFG	JAL9095	TFE25	m2	R1	NAP	8754
20200628-1-AFG	JAL9095	TFE25	m2	R2	NAP	8754
20200628-1-AFG	JAL9095	TFE25	m3	R1	NAP	11945
20200628-1-AFG	JAL9095	TFE25	m3	R2	NAP	11945
20200628-1-AFG	JAL9095	TFE25	m4	R1	NAP	2407
20200628-1-AFG	JAL9095	TFE25	m4	R2	NAP	2407
20200628-1-AFG	JAL9095	TFE25	m5	R1	NAP	4222
20200628-1-AFG	JAL9095	TFE25	m5	R2	NAP	4222
20200628-1-AFG	JAL9095	TFE25	m6	R1	NAP	3140
20200628-1-AFG	JAL9095	TFE25	m6	R2	NAP	3140
20200628-1-AFG	JAL9095	TFE25	m7	R1	NAP	4545
20200628-1-AFG	JAL9095	TFE25	m7	R2	NAP	4545

## Sheet: Table S6.comparison.studies
Table S6. Review of previous studies using NAP buffer (or RNA later) or ethanol for preserving non-invasive samples which were genotyped using genomics or NGS tools.
AS, amplification success. GS, Genotyping succes. ADO, allelic dropout. FA, false alleles.
Species	Sample type	Preservation	AS	GS	ADO	FA	notes	Reference	DOI
Canis lupus	Feces (n=8)	Ethanol 70%	0.796	0.61	0.11	0.06	EM1-DNA extraction QIAmp, 10 STR loci, Illumina MiSeq	Sarabia et al. 2020	https://doi. org/10.32800/abc.2020.43.0271
Canis lupus	Feces (n=8)	Ethanol 70%	0.1	0.06	0.07	0.08	EM2-DNA extraction SPRI beads, 10 STR loci, Illumina MiSeq	Sarabia et al. 2020	https://doi. org/10.32800/abc.2020.43.0271
Ursus arctos	Feces (n=31)	Ethanol 95%	0.803	0.854	0.137	0.008	13 STR loci, Illumina MiSeq	De Barba et al. 2017	https://doi.org/10.1111/1755-0998.12594
Ursus arctos	Hair (n=51)	Paper envelopes in silica desiccant	0.817	0.839	0.106	0.008	13 STR loci, Illumina MiSeq	De Barba et al. 2017	https://doi.org/10.1111/1755-0998.12594
Pan troglodytes	Feces (n=19)	RNAlater (1:1 vol/vol)	-	-	0.07	0.00	8 STR loci, Illumina Miseq	Barbian et al. 2018	https://doi.org/10.1002/ece3.4302
Canis lupus	Feces (n=5)	Ethanol 70%	0.74	0.72	0.22	0.12	46 STR loci, Illumina MiSeq	Salado et al. 2021	https://doi.org/10.1371/journal.pone.0258906
